# Supplementary material
Source: PubMed Central journal article supplement (PMC3572231)
Supplement: NIHMS394042-supplement-supplement_1.pdf [file NIHMS394042-supplement-supplement_1.pdf]

## Supplementary Material to:

### **An unexpected role of semaphorin3A/neuropilin-1 signaling in lymphatic vessel maturation and valve formation**

<sup>\*1</sup>Giorgia Jurisic, <sup>\*2</sup>Hélène Maby-El Hajjami, <sup>1</sup>Sinem Karaman, <sup>1</sup>Alexandra M. Ochsenein, <sup>1</sup>Annamari Alitalo, <sup>1</sup>Shoib S. Siddiqui, <sup>1</sup>Carlos Ochoa Pereira, <sup>2</sup>Tatiana V. Petrova and <sup>1</sup>Michael Detmar

#### **Online methods:**

##### ***Ex vivo* isolation of colon LECs and BECs by high-speed cell sorting**

Eight-weeks-old C57BL/6J mice, maintained under conventional conditions, were used to obtain colon tissue for the *ex vivo* cell isolation of endothelial cells as previously described <sup>1</sup>. Briefly, the washed colon was cut into pieces and incubated in 8 mg/ml collagenase IV (Invitrogen, Carlsbad, CA), 0.5 mg/ml DnaseI (Roche, Rotkreuz, Switzerland), and 5 mM CaCl<sub>2</sub> in PBS at 37<sup>0</sup>C for 15 min. After passing through a cell strainer (BD Biosciences, Franklin Lakes, NJ), cell suspensions were centrifuged, resuspended and immunostained with allophycocyanin (APC)-conjugated rat anti-mouse CD31 antibody, fluorescein isothiocyanate (FITC)-conjugated rat anti-mouse CD45.2 antibody (BD Biosciences), or hamster anti-mouse podoplanin antibody (clone 8.1.1; Developmental Studies Hybridoma Bank, University of Iowa, Iowa City, IA) followed by anti-hamster phycoerythrin (PE)-conjugated secondary antibody (Invitrogen) or isotype control antibodies (BD Biosciences). FACS was performed using a FACS Aria and the FACSDiva software (BD Biosciences). Data were analyzed with FlowJo software (Treestar, Ashland, TN). Animal experiments were approved by the Kantonales Veterinaeramt Zurich.

##### **RNA extraction and amplification**

Colon LECs and BECs were sorted directly into 200 µl of 4<sup>0</sup>C RLT Plus lysis buffer (Qiagen, Basel, Switzerland) supplemented with β-mercaptoethanol for immediate cell lysis and RNA preservation. RNA was extracted from lysed cells with the RNeasy Plus Micro kit (Qiagen). Amplification of RNA was performed with the Whole Transcriptome-Ovation Pico RNA Amplification System (NuGEN Technologies, San

Carlos, CA). The primers had a DNA portion that hybridizes either to the 5' portion of the poly (A) sequence or randomly across the transcript. SPIA amplification, a linear isothermal DNA amplification process, was used to prepare single-stranded cDNA in the antisense direction of the mRNA starting material. The quantity and quality of amplified cDNA was determined with a NanoDrop ND 1000 (NanoDrop Technologies, Delaware, USA) and a Bioanalyzer 2100 (Agilent).

### **Microarray hybridization**

Amplified RNA samples with good Bioanalyzer profile (peak length around 500 nt) were chosen for the microarray experiments. Single-stranded cDNA (4 µg) obtained from 4 matched pairs of LECs and BECs was fragmented and biotin-labeled using the FL-Ovation cDNA Biotin Module V2 kit (NuGEN Technologies). Biotin-labeled cDNA targets were mixed in 220 µl of Hybridization Mix (Affymetrix Inc., Santa Clara, CA) containing hybridization controls and control oligonucleotide B2 (Affymetrix Inc.). Samples were hybridized to GeneChip Mouse Genome 430 2.0 arrays for 18h at 45°C at the Functional Genomics Center Zurich. Arrays were washed using an Affymetrix Fluidics Station 450 FS450 0004 protocol. An Affymetrix GeneChip Scanner 3000 was used to measure the fluorescence intensity emitted by the labeled target.

### **Data processing, quality control and analyses**

Quality control and summarization based on the MAS5.0 algorithm<sup>2,3</sup> were performed in R using the *simpleaffy* package of BioConductor<sup>4,5</sup>. Cell Intensity files (.CEL) were processed into expression values for all of the 45,101 probe sets (transcripts) on each array (n=8). Probe sets with a majority of absent detection calls in all groups were filtered out. Lists of differentially expressed probe sets were produced with pairwise comparisons with pairs defined as LECs and BECs from the same animal. Differentially expressed genes were selected if they passed t-test criteria ( $p \leq 0.01$ ) and showed at least 2-fold changes between the two groups. The Affymetrix probe sets were translated to gene symbols using both the *biomaRt* library and annotation files provided by Affymetrix<sup>6,7</sup>. All experiments were designed and all information was compiled in compliance with MIAME guidelines<sup>8</sup>. The array data have been deposited in the National Center for Biotechnology Information (NCBI) Gene Expression Omnibus (GEO) and are accessible through GEO Series accession no. GSE22034.

### **Quantitative real-time PCR**

Ten ng of cDNA per reaction obtained by amplifying the RNA from sorted cells was used per reaction of the real-time PCR experiments. Taqman Gene Expression Master Mix and assays (Applied Biosystems, Foster City, CA) were used to determine the expression levels of VEGFR1 (Mm\_01210866\_m1), podoplanin (Mm00494716\_m1), LYVE-1 (Mm01280692\_m1), Nrp-1 (Mm01253206\_m1) and Nrp-2 (Mm00803099\_m1). Duplex reactions with beta-actin (4352341E) as endogenous control were run under standard conditions (AmpliTaq Gold enzyme activation 95<sup>0</sup>C for 10 min, 40 cycles of denaturation at 95<sup>0</sup>C for 15 sec and annealing and extension at 60<sup>0</sup>C for 1 min). Power SYBR Green PCR Master Mix (Applied Biosystems) and QuantiTect Primer Assays (Qiagen) were used to determine the expression levels of Sema3A (QT00173971), Sema3D (QT00125874) and Sema3G (QT1160887) with beta-actin as endogenous control (QT01136772). RNA was also extracted from human LECs and BECs, isolated and cultured as previously described <sup>9</sup>, and from HUVEC cells (ScienCell, Carlsbad, USA) with the RNeasy Micro kit (Qiagen) including the on-column DNase treatment, and transcribed to cDNA using the High Capacity cDNA Reverse Transcription Kit (Applied Biosystems). QuantiTect Primer Assays (Qiagen) for human Sema3A (QT00040936), Sema3D (QT00037023) and beta-actin primers (forward: 5'-TCACCGAGCGCGGCT-3', reverse: 5'-TAATGTCACGCACGATTTCCC-3') were used with Power SYBR Green PCR Master Mix (Applied Biosystems), and PCR reactions were performed under standard conditions. A 7900HT Fast Real-Time PCR System (Applied Biosystems) was used for all qPCR experiments.

### **Immunohistochemistry**

Serial sections of paraffin-embedded mouse colon were incubated at 60<sup>0</sup> C for 4h, deparaffinized and boiled in citric buffer for antigen retrieval. After endogenous peroxidase block, sections were incubated in 1% Triton X-100 (Sigma Aldrich, Munich, Germany) and blocked with 1% BSA and 0.5% donkey serum in PBS. Immunostaining was performed with goat anti-Sema3A antibody (C-17, Santa Cruz, Santa Cruz, CA), rabbit anti-LYVE-1 antibody (kind gift from N. Gale, Regeneron Pharmaceuticals, Tarrytown NY) or goat IgG, followed by biotin-labeled secondary antibodies (Vector, Burlingame, CA). Streptavidin-conjugated peroxidase was used

with the AEC kit as a substrate (Vector). Hematoxylin was used for nuclear counterstains.

### ***In utero* treatment of mice**

Timed pregnancies were set up in FVB/N wild type mice. The morning when vaginal plugs were found was defined as day E0.5. On days E12.5, E14.4 and E16.5 the pregnant females (3 per group) received intraperitoneal injections of 1.2 mg of anti-Nrp-1A antibody, anti-Nrp-1B antibody<sup>10, 11</sup> or the control mouse IgG antibody (Sigma). Neonatal pups were collected for analysis at day P5.5.

### **Whole-mount staining**

Intestines with attached mesentery were collected from embryos or neonatal mice and fixed in 4% PFA. Intestines were pinned onto the silicon-coated 6-well-plates to expose the mesentery and were washed several times with PBS. Tissues were then incubated in immunomix solution (0.2% BSA, 5% donkey serum, 0.1% Triton X-100 and 0.05% sodium-azide in PBS) for 1h at room temperature. Primary antibodies were diluted in immunomix solution and were applied over night at room temperature, followed by washing with 0.1% Triton-X for 4h. Secondary antibodies were diluted in a 1:1 mixture of PBS and immunomix solution. Tissues were incubated at room temperature for 4h and washed with 0.1% Triton-X for 4h, followed by short postfixation with 4% PFA and several PBS washes. Thereafter, tissues were mounted in Vectashield (Vector) onto chambered coverglasses (Nunc, Rochester NY) for confocal imaging. Antibodies used were mouse Cy3-conjugated anti-SMA (Sigma), goat anti-VEGFR3 (AF743, R&D Systems Abingdon, United Kingdom), rabbit anti-Prox1 (kind gift from Dr. K. Alitalo), mouse anti-Nrp-1A<sup>10</sup>; goat anti-Nrp-1 (R&D Systems), hamster anti-CD31 (2H8 clone, Millipore, Billerica, MA, USA), goat anti-integrin-alpha 9 (R&D Systems), mouse anti-FNIIIIEA (clone FN-3E2, Sigma), rat anti-mouse CD31 (clone MEC 13.3, BD Biosciences), and AlexaFluor 488, 555, 594 or 647-conjugated secondary antibodies (Invitrogen). For some stainings ProLong® Gold antifade reagent with DAPI (Invitrogen) was used. For quantification of lymphatic valves, total number of valves identified by staining for integrin-alpha9 and FNEIIIA was counted on five mesenteric vessels in 2-3 mice subjected to each type of treatment. Whole-mount images were acquired with a LSM 710 FCS confocal

microscope and ZEN software (Zeiss, Jena, Germany) and processed with IMARIS software (Bitplane AG, Zürich, Switzerland).

### **Pericyte culture and migration**

Primary human pericytes (PromoCell, Heidelberg, Germany) were cultured according to the manufacturer's recommendations. Total RNA was isolated from pericytes and HUVECs (ScienCell), and real-time PCR was performed with TaqMan gene expression assays for Nrp-1 (Hs00826128\_m1) and CD31 (Hs00169777\_m1), using the Taqman Gene Expression Master Mix (Applied Biosystems). Pericytes seeded onto chambered coverglass (Nunc) were fixed in 4% PFA and permeabilized with 0.3% Triton-X. Thereafter, cells were blocked with goat serum and primary goat antibody to Nrp-1 (clone C-19, Santa Cruz) or control goat IgG (Abcam, Cambridge, UK) were applied, followed by an AlexaFluor 594 conjugated secondary antibody (Invitrogen) and Hoechst bisbenzimidazole (Invitrogen). Images were acquired with a LSM 710 FCS confocal microscope and ZEN software (Zeiss). Transwell migration assays were performed using polycarbonate, 8 µm pore size-membrane 24-well plates (Corning Life sciences). 40,000 pericytes at passage 6-7 were seeded in serum-free medium onto the upper side of the insert that was coated with 1 µg/ml fibronectin (Millipore) on the bottom side and blocked with 0.2% BSA. Cells were allowed to migrate for 3h to the lower chamber containing either 1% FCS alone or also recombinant Sema3A (50, 100 or 200 ng/ml; R&D Systems) and Nrp-1A, Nrp-1B or control mouse IgG antibodies (20 µg/ml). Non-migrated cells were mechanically removed, migrated cells were stained with Hoechst bisbenzimidazole and 5 random images were taken per insert. Nuclei from 3 wells per condition were counted using the ImageJ program (National Institutes of Health, Bethesda), and the unpaired t-test was used to calculate the p-values.

### **Lymphatic vessel tracing**

Approximately 3 µl of 5 mg/ml FITC-dextran (Mw ~2000 kDa; Invitrogen) was injected into the forelimb footpad of anaesthetized P5.5 mice (n=8 per group). After 2 min, forelimb lymphatic vessels were imaged noninvasively using a stereomicroscope Lumar.V12 and AxioCam digital camera (Zeiss). After 15 min, the pups were sacrificed, the overlaying skin was removed and the lymphatic vessels were imaged.

### **Immunofluorescence analysis**

Abdominal skin and small intestine were dissected from treated and control pups (n=3-5 per group) at day P5.5 and snap frozen in optimal cutting temperature compound (Sakura Fintek, Zoeterwoude, NE). Eight- $\mu$ m cryosections were immunostained with rat anti-mouse CD31 antibody (BD Biosciences) and rabbit LYVE-1 antibody (Angiobio, Del Mar, CA) as described <sup>1</sup>. The tissue area occupied by vessels was quantified using IP LAB software (Scanalytics, Fairfax, VA).

### **Analysis of retinal neovascularization**

Eyes from P5.5 pups (n=7-9 per group) were enucleated and retinas were dissected from the eyecup. After blocking and permeabilization in 0.5% BSA and 0.3% Triton X-100-containing PBS, staining with biotinylated isolectin B4 (Vector) diluted in PBLEC (0.1% Triton X-100, 0.1 mM CaCl<sub>2</sub>, 0.1 mM MgCl<sub>2</sub>, 0.1 mM MnCl<sub>2</sub>, in PBS [pH 6.8]) was performed overnight at 4<sup>0</sup>C. Retinas were then washed and Alexa 488-streptavidin (Invitrogen) was added. Stained retinas were flat-mounted in Vectashield for imaging with an Axioskop2 motplus microscope and an AxioCam MRc digital camera (Zeiss). Vascular extension was calculated by measuring the distance from the optic nerve head to the vascular edge and the distance from the optic nerve head to the edge of retinal cup. Quantification of vascular density was performed by determining the area covered by vessels in the region of vascular remodeling <sup>11</sup>. The analyses were performed using Adobe PhotoShop CS4 Extended software.

### **References:**

1. Jurisic G, Sundberg JP, Bleich A, Leiter EH, Broman KW, Buechler G, Alley L, Vestweber D, Detmar M. Quantitative lymphatic vessel trait analysis suggests *vcam1* as candidate modifier gene of inflammatory bowel disease. *Genes Immun.* 2010;11:219-231
2. Liu WM, Mei R, Di X, Ryder TB, Hubbell E, Dee S, Webster TA, Harrington CA, Ho MH, Baid J, Smeekens SP. Analysis of high density expression microarrays with signed-rank call algorithms. *Bioinformatics.* 2002;18:1593-1599

3. Pepper SD, Saunders EK, Edwards LE, Wilson CL, Miller CJ. The utility of mas5 expression summary and detection call algorithms. *BMC Bioinformatics*. 2007;8:273
4. Gentleman RC, Carey VJ, Bates DM, Bolstad B, Dettling M, Dudoit S, Ellis B, Gautier L, Ge Y, Gentry J, Hornik K, Hothorn T, Huber W, Iacus S, Irizarry R, Leisch F, Li C, Maechler M, Rossini AJ, Sawitzki G, Smith C, Smyth G, Tierney L, Yang JY, Zhang J. Bioconductor: Open software development for computational biology and bioinformatics. *Genome Biol*. 2004;5:R80
5. Wilson CL, Miller CJ. Simpleaffy: A bioconductor package for affymetrix quality control and data analysis. *Bioinformatics*. 2005;21:3683-3685
6. Smedley D, Haider S, Ballester B, Holland R, London D, Thorisson G, Kasprzyk A. Biomart--biological queries made easy. *BMC Genomics*. 2009;10:22
7. Liu G, Loraine AE, Shigeta R, Cline M, Cheng J, Valmeekam V, Sun S, Kulp D, Siani-Rose MA. Netaffx: Affymetrix probesets and annotations. *Nucleic Acids Res*. 2003;31:82-86
8. Brazma A, Hingamp P, Quackenbush J, Sherlock G, Spellman P, Stoeckert C, Aach J, Ansorge W, Ball CA, Causton HC, Gaasterland T, Glenisson P, Holstege FC, Kim IF, Markowitz V, Matese JC, Parkinson H, Robinson A, Sarkans U, Schulze-Kremer S, Stewart J, Taylor R, Vilo J, Vingron M. Minimum information about a microarray experiment (miame)-toward standards for microarray data. *Nat. Genet*. 2001;29:365-371
9. Hirakawa S, Hong YK, Harvey N, Schacht V, Matsuda K, Libermann T, Detmar M. Identification of vascular lineage-specific genes by transcriptional profiling of isolated blood vascular and lymphatic endothelial cells. *Am. J. Pathol*. 2003;162:575-586
10. Liang W-C, Dennis MS, Stawicki S, Chanthery Y, Pan Q, Chen Y, Eigenbrot C, Yin J, Koch AW, Wu X, Ferrara N, Bagri A, Tessier-Lavigne M, Watts RJ, Wu Y. Function blocking antibodies to neuropilin-1 generated from a designed human synthetic antibody phage library. *J. Mol. Biol*. 2007;366:815-829
11. Pan Q, Chanthery Y, Liang W-C, Stawicki S, Mak J, Rathore N, Tong RK, Kowalski J, Yee SF, Pacheco G, Ross S, Cheng Z, Le Couter J, Plowman G, Peale F, Koch AW, Wu Y, Bagri A, Tessier-Lavigne M, Watts RJ. Blocking

neuropilin-1 function has an additive effect with anti-vegf to inhibit tumor growth. *Cancer Cell*. 2007;11:53-67

**Online Figure legends:**

**Online Figure I. *In utero* blockade of Sema3A/Nrp-1 signaling leads to decreased body weight of mice at P5.5.** Treatment of mice *in utero* (E12.5-E16.5) with an antibody that blocks Sema3A binding to Nrp-1 (anti-Nrp-1A), but not with an antibody that blocks VEGFA binding to Nrp-1 (anti-Nrp1B), resulted in reduced body weight of mice at day P5.5 when compared to control mice (lines indicate the mean value, \*\*p<0.01, n=9-13).

**Online Figure II. Additional examples of defective lymphatic vessel morphology and aberrant SMC coverage in anti-Nrp-1A treated mice.** (A) Whole-mount preparations of mesenteries immunostained for CD31 (magenta), VEGFR3 (green) and Prox1 (red) were analyzed. When compared with control IgG-treated animals (first row), anti-Nrp-1A-treated animals (rows 2-4 representing 3 separate animals) showed defective collecting lymphatic vessels morphology in the mesentery (rows 2-4, arrowheads). CD31 staining differentiates lymphatic vessels (LV), veins (V) and arteries (A). Scale bars: 100  $\mu$ m. (B) Alpha-smooth muscle actin ( $\alpha$ -SMA) expressing SMCs densely cover the vein (V) and artery (A), but not the Prox1 (red)-positive lymphatic vessels (asterisks) in control mice. Treatment of mice with anti-Nrp-1A antibody resulted in excessive coverage of collecting lymphatic vessels by SMCs (arrowheads), as shown by differential  $\alpha$ -SMA (green) and Prox1 (red)



immunostaining of whole-mount prepared mesenteries at day P5.5. Scale bars: 50  $\mu\text{m}$ . All images were obtained by confocal microscopy.

**Online Figure III. (A) Fewer blood vessels are observed upon treatment with an antibody blocking VEGFA binding to Nrp-1 (anti-Nrp-1B).** Representative images of abdominal skin cryosections of P5 mice stained for CD31 (red) and LYVE-1 (green). Scale bars: 100  $\mu\text{m}$ . **(B)** Quantification of the area occupied by blood vessels (CD31-positive, LYVE-1-negative), expressed as the percentage of the area occupied by vessels in the whole skin area (\* $p=0.047$ ,  $n=3-5$ ). Bars represent mean value  $\pm$  standard deviation. **(C) Blockade of Sema3A binding to Nrp-1 does not affect vascular remodeling in the developing retina.** Representative images of P5.5 retina vasculature stained for isolectin B4. Scale bars: 500  $\mu\text{m}$ . **(D)** Quantification of the vascular extension into the retina measured by dividing the distance from the optic nerve head to the edge of the vasculature with the distance from the optic nerve head to the retinal cup edge. **(E)** Vascular density quantification by measuring the area covered by vessels in the region of vascular remodeling.  $N$  (control IgG)=7,  $n$  (anti-Nrp-1A)=9. Bars represent mean value  $\pm$  standard deviation. Changes are not significant.

**Online Table I.** Gene microarray analysis of *ex vivo* isolated mouse intestinal lymphatic vs. blood vascular endothelial cells revealed genes that are specifically expressed by lymphatic endothelium. Complete list of significantly differentially expressed genes ( $\log_2$  ratio  $\geq 2$ ,  $p$ -value  $\leq 0.01$ ,  $\log_2$  signal  $\geq 5$  in LEC group).

**Online Table II.** Gene microarray analysis of *ex vivo* isolated mouse intestinal blood vascular endothelial cells vs. lymphatic endothelial cells revealed genes that are

specifically expressed by blood vessel endothelium. Complete list of significantly differentially expressed genes ( $\log_2$  ratio  $\geq 2$ , p-value  $\leq 0.01$ ,  $\log_2$  signal  $\geq 5$  in BEC group).



# Online Figure II

## A

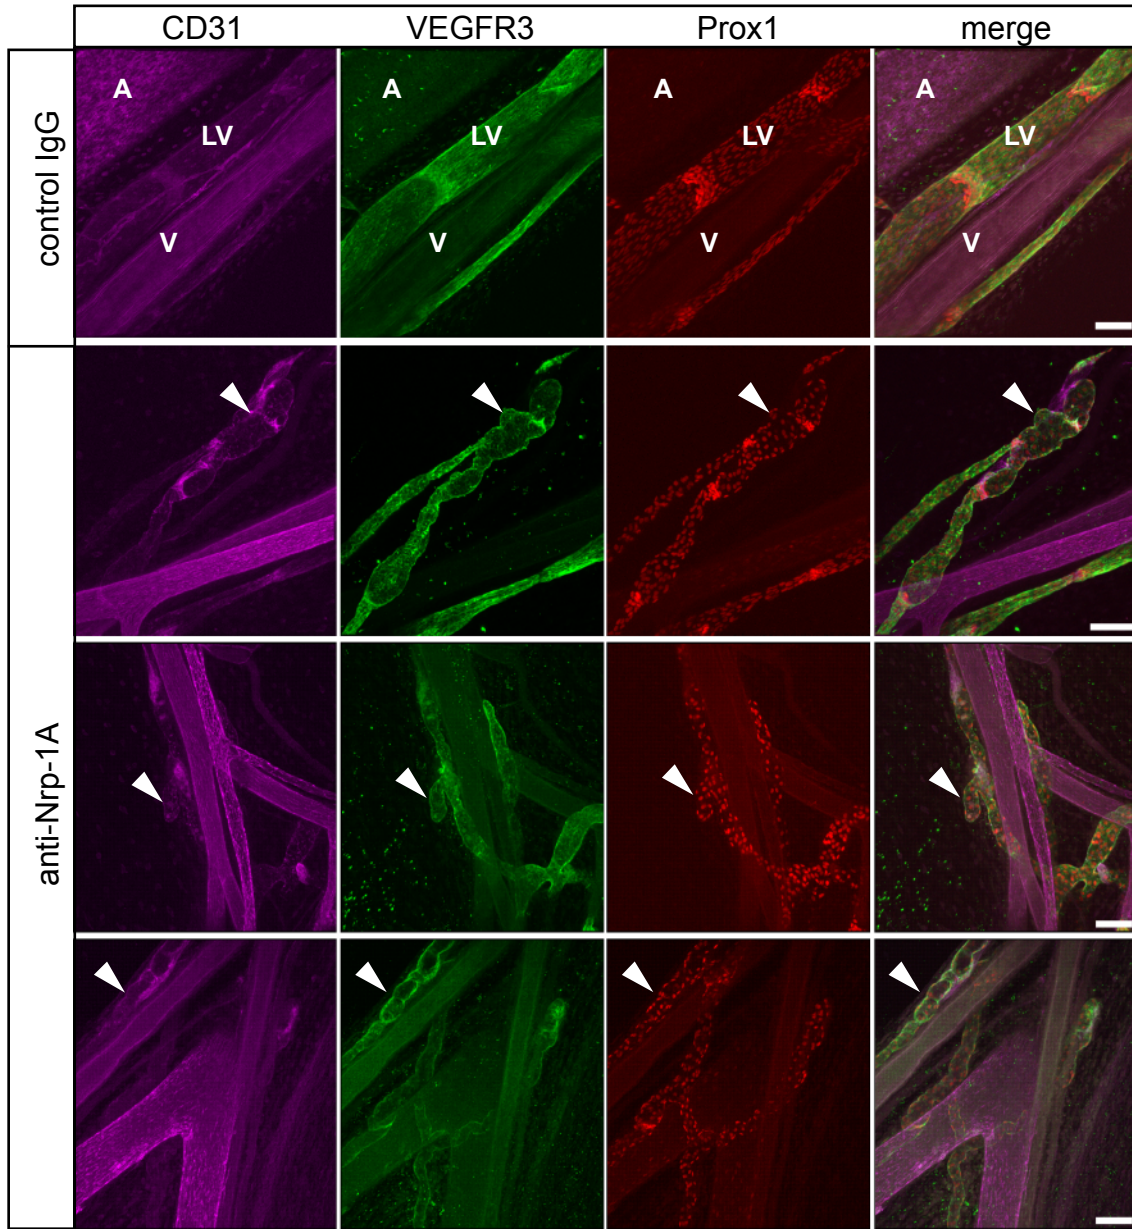

## B

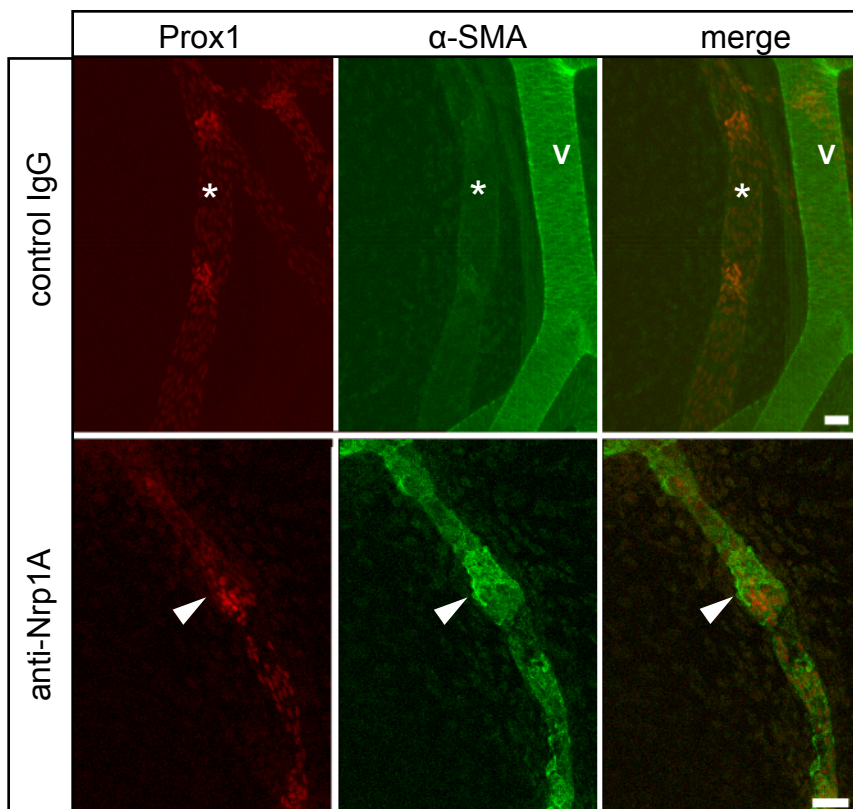

# Online Figure III

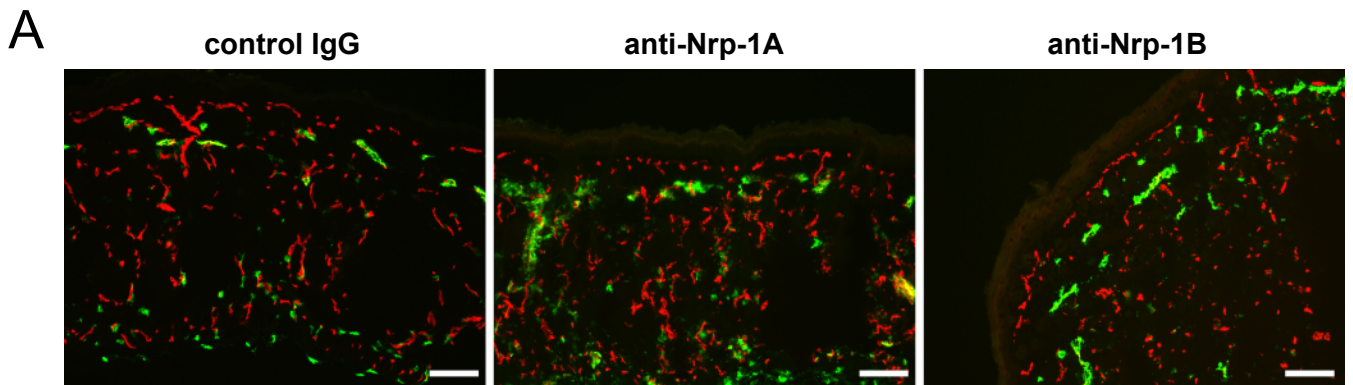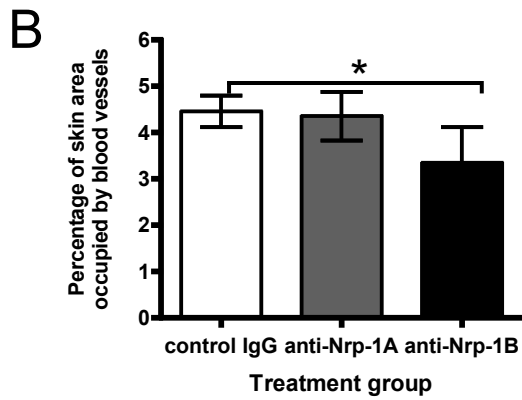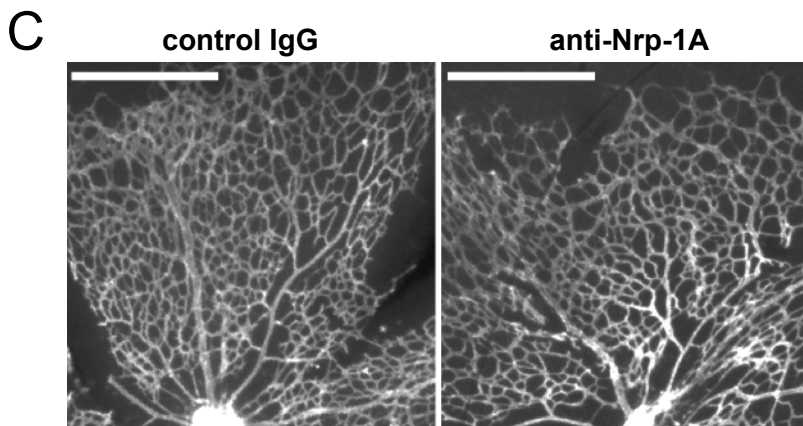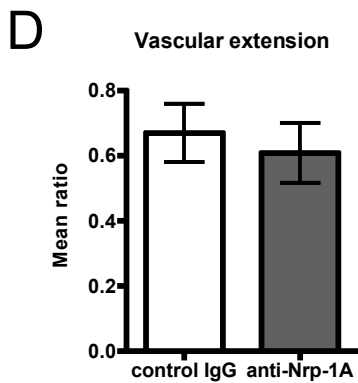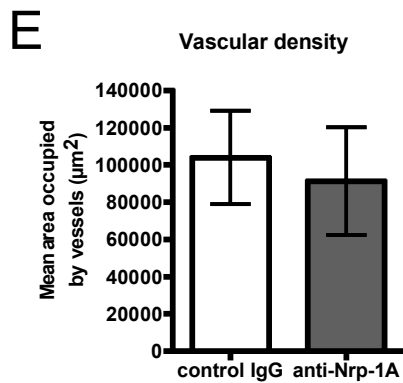

**Online Table I.** Gene microarray analysis of *ex vivo* isolated mouse intestinal lymphatic vs. blood vascular endothelial cells revealed genes that are specifically expressed by lymphatic endothelium. Complete list of significantly differentially expressed genes ( $\log_2$  ratio  $\geq 2$ ,  $p$ -value  $\leq 0.01$ ,  $\log_2$  signal  $\geq 5$  in LEC group).

| Probe ID     | Gene Symbol              | Gene Title                                                                             | Entrez Gene ID | median $\log_2$ signal contBEC | median $\log_2$ signal contLEC | fold change contLEC vs. contBEC | p-value  |
|--------------|--------------------------|----------------------------------------------------------------------------------------|----------------|--------------------------------|--------------------------------|---------------------------------|----------|
| 1417894_at   | Gpr97                    | G protein-coupled receptor 97                                                          | 54672          | 0.28                           | 10.45                          | 1105.10                         | 1.92E-04 |
| 1456060_at   | Mafb                     | v-maf musculoaponeurotic fibrosarcoma oncogene family, protein B (avian)               | 16658          | 3.76                           | 12.65                          | 833.69                          | 6.63E-03 |
| 1427747_a_at | Lcn2                     | lipocalin 2                                                                            | 16819          | 0.86                           | 10.06                          | 717.33                          | 4.36E-05 |
| 1416211_a_at | Ptn                      | pleiotrophin                                                                           | 19242          | 0.32                           | 9.63                           | 685.49                          | 6.49E-05 |
| 1428157_at   | Gng2                     | guanine nucleotide binding protein (G protein), gamma 2                                | 14702          | 0.13                           | 8.80                           | 513.98                          | 3.28E-04 |
| 1417455_at   | Tgfb3                    | transforming growth factor, beta 3                                                     | 21809          | 0.68                           | 9.38                           | 507.80                          | 1.18E-03 |
| 1429459_at   | Sema3d                   | sema domain, immunoglobulin domain (Ig), short basic domain, secreted, (semaphorin) 3D | 108151         | 0.58                           | 9.10                           | 484.27                          | 1.54E-04 |
| 1437260_at   | Mmrn1                    | multimerin 1                                                                           | 70945          | 4.10                           | 13.16                          | 475.31                          | 6.34E-05 |
| 1449465_at   | Reln                     | reelin                                                                                 | 19699          | 4.62                           | 12.98                          | 458.89                          | 3.14E-04 |
| 1419309_at   | Pdpn                     | podoplanin                                                                             | 14726          | 3.32                           | 12.24                          | 455.70                          | 1.83E-06 |
| 1429379_at   | Lyve1                    | lymphatic vessel endothelial hyaluronan receptor 1                                     | 114332         | 3.99                           | 12.90                          | 447.12                          | 6.53E-06 |
| 1419426_s_at | Ccl21                    | chemokine (C-C motif) ligand 21                                                        | 65956          | 5.12                           | 14.20                          | 422.31                          | 3.07E-03 |
| 1447849_s_at | Mafb                     | v-maf musculoaponeurotic fibrosarcoma oncogene family, protein B (avian)               | 16658          | -0.47                          | 8.80                           | 411.24                          | 3.12E-03 |
| 1422313_a_at | Igfbp5                   | insulin-like growth factor binding protein 5                                           | 16011          | 6.16                           | 13.35                          | 356.48                          | 4.90E-03 |
| 1422080_at   | Il7                      | interleukin 7                                                                          | 16196          | -0.79                          | 7.38                           | 354.30                          | 4.11E-05 |
| 1423135_at   | Thy1                     | thymus cell antigen 1, theta                                                           | 21838          | 3.97                           | 12.54                          | 323.70                          | 7.08E-05 |
| 1437473_at   | Mafb                     | v-maf musculoaponeurotic fibrosarcoma oncogene family, protein B (avian)               | 16658          | 4.16                           | 12.25                          | 314.57                          | 2.71E-03 |
| 1426664_x_at | Slc45a3                  | solute carrier family 45, member 3                                                     | 212980         | -0.14                          | 9.84                           | 310.19                          | 8.52E-03 |
| 1427054_s_at | Abi3bp                   | ABI gene family, member 3 (NESH) binding protein                                       | 320712         | 1.08                           | 8.99                           | 298.89                          | 1.41E-03 |
| 1429210_at   | Col23a1                  | collagen, type XXIII, alpha 1                                                          | 237759         | -0.58                          | 6.36                           | 231.45                          | 1.17E-04 |
| 1453128_at   | Lyve1                    | lymphatic vessel endothelial hyaluronan receptor 1                                     | 114332         | 5.44                           | 13.51                          | 227.20                          | 2.03E-04 |
| 1432103_a_at | Sh3gl3                   | SH3-domain GRB2-like 3                                                                 | 20408          | 0.75                           | 8.59                           | 218.89                          | 6.36E-05 |
| 1417806_at   | Popdc2                   | popeye domain containing 2                                                             | 64082          | 0.88                           | 8.34                           | 218.12                          | 3.27E-05 |
| 1434188_at   | Slc16a12                 | solute carrier family 16 (monocarboxylic acid transporters), member 12                 | 240638         | 0.42                           | 8.04                           | 215.97                          | 3.26E-03 |
| 1426915_at   | Dapk1                    | death associated protein kinase 1                                                      | 69635          | 0.79                           | 8.04                           | 196.64                          | 2.31E-05 |
| 1437894_at   | Prox1                    | prospero-related homeobox 1                                                            | 19130          | 3.61                           | 11.50                          | 190.78                          | 1.33E-05 |
| 1422112_at   | Ccbp2                    | chemokine binding protein 2                                                            | 59289          | 0.78                           | 8.47                           | 189.60                          | 1.43E-04 |
| 1419476_at   | Adamdec1                 | ADAM-like, decysin 1                                                                   | 58860          | 2.69                           | 9.82                           | 175.69                          | 3.24E-03 |
| 1433523_at   | D930005D10Rik            | RIKEN cDNA D930005D10 gene                                                             | 231858         | 0.99                           | 7.96                           | 173.85                          | 3.13E-05 |
| 1450798_at   | Tnxb                     | tenascin XB                                                                            | 81877          | 2.60                           | 10.31                          | 172.75                          | 2.09E-05 |
| 1420416_at   | Sema3a                   | sema domain, immunoglobulin domain (Ig), short basic domain, secreted, (semaphorin) 3A | 20346          | 1.61                           | 9.38                           | 169.28                          | 1.49E-03 |
| 1452114_s_at | Igfbp5                   | insulin-like growth factor binding protein 5                                           | 16011          | 5.69                           | 12.90                          | 166.55                          | 2.87E-04 |
| 1421854_at   | Fgl2                     | fibrinogen-like protein 2                                                              | 14190          | 5.53                           | 12.84                          | 160.64                          | 9.50E-05 |
| 1420851_at   | Pard6g                   | par-6 partitioning defective 6 homolog gamma (C. elegans)                              | 93737          | 4.16                           | 11.17                          | 158.42                          | 1.05E-03 |
| 1457432_at   | Prox1                    | prospero-related homeobox 1                                                            | 19130          | 2.71                           | 10.77                          | 157.72                          | 7.09E-04 |
| 1458534_at   | Rgs7bp                   | regulator of G-protein signalling 7 binding protein                                    | 52882          | -0.45                          | 7.44                           | 157.19                          | 4.55E-03 |
| 1421855_at   | Fgl2                     | fibrinogen-like protein 2                                                              | 14190          | 5.29                           | 11.44                          | 156.51                          | 6.31E-03 |
| 1426511_at   | Susd2                    | sushi domain containing 2                                                              | 71733          | 1.81                           | 8.71                           | 153.32                          | 7.61E-05 |
| 1457743_at   | ---                      | ---                                                                                    | 52882          | -0.79                          | 5.52                           | 149.12                          | 2.51E-04 |
| 1436833_x_at | Till1                    | tubulin tyrosine ligase-like 1                                                         | 319953         | 0.54                           | 7.78                           | 142.36                          | 4.90E-03 |
| 1426442_at   | Gpm6a                    | glycoprotein m6a                                                                       | 234267         | 3.89                           | 10.98                          | 140.40                          | 8.13E-06 |
| 1433509_s_at | Reep1                    | receptor accessory protein 1                                                           | 52250          | 0.69                           | 8.08                           | 139.95                          | 8.95E-03 |
| 1434264_at   | Ank2                     | ankyrin 2, brain                                                                       | 109676         | 1.64                           | 7.71                           | 139.63                          | 4.00E-04 |
| 1416666_at   | Serpine2                 | serine (or cysteine) peptidase inhibitor, clade E, member 2                            | 20720          | 5.86                           | 11.85                          | 138.14                          | 8.76E-03 |
| 1450025_at   | Pard6g                   | par-6 partitioning defective 6 homolog gamma (C. elegans)                              | 93737          | 1.46                           | 9.50                           | 137.47                          | 4.48E-03 |
| 1417496_at   | Cp                       | ceruloplasmin                                                                          | 12870          | 5.22                           | 11.62                          | 137.18                          | 2.44E-03 |
| 1426865_a_at | Ncam1                    | neural cell adhesion molecule 1                                                        | 17967          | -0.29                          | 6.30                           | 134.96                          | 1.13E-03 |
| 1458659_at   | Plac9                    | placenta specific 9                                                                    | 211623         | 1.87                           | 8.25                           | 131.81                          | 3.76E-03 |
| 1437937_at   | Ccbp2                    | chemokine binding protein 2                                                            | 59289          | 2.88                           | 10.86                          | 126.40                          | 7.28E-03 |
| 1456741_s_at | Gpm6a                    | glycoprotein m6a                                                                       | 234267         | 5.20                           | 11.70                          | 123.54                          | 6.92E-04 |
| 1458020_at   | Reln                     | Reelin                                                                                 | 19699          | 0.27                           | 6.69                           | 122.02                          | 1.19E-03 |
| 1441326_at   | Cp                       | ceruloplasmin                                                                          | 12870          | -0.54                          | 6.93                           | 115.26                          | 2.98E-03 |
| 1425822_a_at | Dtx1                     | deltex 1 homolog (Drosophila)                                                          | 14357          | 3.96                           | 10.52                          | 110.09                          | 5.80E-05 |
| 1455096_at   | Firt2                    | fibronectin leucine rich transmembrane protein 2                                       | 399558         | -0.44                          | 7.24                           | 105.20                          | 9.97E-03 |
| 1450430_at   | Mrc1                     | mannose receptor, C type 1                                                             | 17533          | 3.22                           | 9.67                           | 101.23                          | 2.57E-04 |
| 1453148_at   | Sema3d                   | sema domain, immunoglobulin domain (Ig), short basic domain, secreted, (semaphorin) 3D | 108151         | 3.24                           | 9.95                           | 100.71                          | 1.96E-07 |
| 1449865_at   | Sema3a                   | sema domain, immunoglobulin domain (Ig), short basic domain, secreted, (semaphorin) 3A | 20346          | 3.21                           | 9.56                           | 100.55                          | 4.83E-05 |
| 1416986_a_at | Sirpa                    | signal-regulatory protein alpha                                                        | 19261          | 4.43                           | 10.20                          | 99.56                           | 1.23E-03 |
| 1421696_at   | F430003O07Rik /// Pkhd11 | Riken cDNA F430003O07 gene /// polycystic kidney and hepatic disease 1-like 1          | 100126676      | 1.23                           | 8.98                           | 97.57                           | 2.76E-03 |
| 1417889_at   | Apobec2                  | apolipoprotein B mRNA editing enzyme, catalytic polypeptide 2                          | 11811          | 1.07                           | 7.44                           | 97.08                           | 9.88E-05 |
| 1435828_at   | Mafb                     | v-maf musculoaponeurotic fibrosarcoma oncogene family, protein B (avian)               | 16658          | 2.37                           | 7.82                           | 95.04                           | 4.57E-03 |

|              |                        |                                                                 |           |       |       |       |          |
|--------------|------------------------|-----------------------------------------------------------------|-----------|-------|-------|-------|----------|
| 1438780_at   | ---                    | ---                                                             |           | 0.31  | 6.64  | 94.21 | 2.36E-04 |
| 1425476_at   | Col4a5                 | collagen, type IV, alpha 5                                      | 12830     | 0.57  | 6.81  | 94.14 | 3.35E-03 |
| 1434465_x_at | Vldlr                  | very low density lipoprotein receptor                           | 22359     | 2.08  | 8.92  | 88.59 | 4.59E-03 |
| 1448550_at   | Lbp                    | lipopolysaccharide binding protein                              | 16803     | 4.80  | 11.20 | 88.04 | 1.50E-04 |
| 1430153_at   | Tmod2                  | tropomodulin 2                                                  | 50876     | 0.93  | 7.57  | 84.93 | 9.08E-03 |
| 1427053_at   | Abi3bp                 | ABI gene family, member 3 (NESH) binding protein                | 320712    | 0.53  | 6.64  | 83.20 | 2.78E-03 |
| 1455301_at   | Wipf3                  | WAS/WASL interacting protein family, member 3                   | 330319    | 5.69  | 11.65 | 82.93 | 9.63E-04 |
| 1451827_a_at | Nox4                   | NADPH oxidase 4                                                 | 50490     | -0.27 | 5.66  | 80.51 | 6.80E-03 |
| 1428111_at   | Slc38a4                | solute carrier family 38, member 4                              | 69354     | 0.82  | 6.83  | 74.91 | 3.16E-03 |
| 1421336_at   | Prox1                  | prospero-related homeobox 1                                     | 19130     | 3.00  | 8.76  | 73.21 | 5.74E-03 |
| 1450876_at   | Cfh                    | complement component factor h                                   | 12628     | 3.25  | 8.52  | 72.41 | 4.85E-03 |
| 1449484_at   | Stc2                   | stanniocalcin 2                                                 | 20856     | 1.62  | 7.74  | 71.52 | 1.56E-03 |
| 1452779_at   | 3110006E14Rik          | RIKEN cDNA 3110006E14 gene                                      | 76980     | -0.36 | 6.06  | 70.94 | 4.32E-03 |
| 1416321_s_at | Prelp                  | proline arginine-rich end leucine-rich repeat multimerin 1      | 116847    | 6.04  | 12.07 | 70.87 | 2.44E-04 |
| 1430621_at   | Mmm1                   | ---                                                             | 70945     | 2.48  | 7.83  | 68.55 | 2.62E-03 |
| 1435579_at   | ---                    | ---                                                             | ---       | 0.31  | 7.04  | 68.33 | 1.00E-03 |
| 1448254_at   | Ptn                    | pleiotrophin                                                    | 19242     | 4.15  | 9.89  | 63.88 | 3.72E-04 |
| 1434709_at   | Nrcam                  | neuron-glia-CAM-related cell adhesion molecule                  | 319504    | 3.60  | 8.49  | 63.81 | 4.10E-03 |
| 1433500_at   | Dennd2a                | DENN/MADD domain containing 2A                                  | 209773    | 1.48  | 7.79  | 63.53 | 2.30E-03 |
| 1439045_x_at | Tc2n                   | tandem C2 domains, nuclear                                      | 74413     | 1.87  | 7.04  | 63.30 | 4.26E-03 |
| 1424007_at   | Gdf10                  | growth differentiation factor 10                                | 14560     | -0.42 | 6.33  | 63.10 | 4.98E-04 |
| 1450805_at   | Sgcd                   | sarcoglycan, delta (dystrophin-associated glycoprotein)         | 24052     | 1.48  | 8.30  | 62.69 | 2.39E-03 |
| 1447869_x_at | Rhobtb3                | Rho-related BTB domain containing 3                             | 73296     | 0.44  | 6.24  | 62.62 | 1.07E-03 |
| 1422694_at   | Ttyh1                  | tweety homolog 1 (Drosophila)                                   | 57776     | 1.91  | 6.60  | 62.46 | 6.77E-03 |
| 1426562_a_at | Olfm1                  | olfactomedin 1                                                  | 56177     | 1.27  | 6.90  | 59.72 | 1.12E-05 |
| 1445394_at   | ---                    | ---                                                             | ---       | 1.42  | 8.06  | 59.18 | 2.41E-03 |
| 1420876_a_at | Sep6                   | septin 6                                                        | 56526     | 2.18  | 7.95  | 56.84 | 2.18E-03 |
| 1449178_at   | Pdlim3                 | PDZ and LIM domain 3                                            | 53318     | 5.07  | 10.03 | 56.64 | 2.06E-03 |
| 1431004_at   | LOC100047339           | similar to lysyl oxidase-like 2                                 | 100047339 | 2.11  | 7.76  | 56.44 | 3.94E-04 |
| 1447812_x_at | Fln                    | filamin C, gamma (actin binding protein 280)                    | 68794     | 4.68  | 10.49 | 55.83 | 2.60E-04 |
| 1442576_at   | Creb5                  | cAMP responsive element binding protein 5                       | 231991    | 0.15  | 5.85  | 55.21 | 5.42E-04 |
| 1421852_at   | Kcnk5                  | potassium channel, subfamily K, member 5                        | 16529     | 3.46  | 8.43  | 55.09 | 2.95E-03 |
| 1426326_a_at | Scn3b                  | sodium channel, voltage-gated, type III, beta                   | 235281    | 0.36  | 5.81  | 55.03 | 4.43E-03 |
| 1452436_at   | Lox2                   | lysyl oxidase-like 2                                            | 94352     | 2.13  | 8.10  | 54.16 | 5.18E-03 |
| 1453321_at   | Fndc1                  | fibronectin type III domain containing 1                        | 68655     | 4.38  | 10.18 | 53.48 | 7.65E-05 |
| 1436021_at   | Mfsd4                  | major facilitator superfamily domain containing 4               | 213006    | 3.48  | 9.15  | 51.39 | 1.67E-03 |
| 1443646_at   | Igslf10                | immunoglobulin superfamily, member 10                           | 242050    | 0.05  | 5.22  | 50.71 | 7.01E-03 |
| 1422987_at   | Ntn1                   | netrin 1                                                        | 18208     | 3.33  | 8.43  | 50.70 | 5.46E-04 |
| 1446658_at   | ---                    | ---                                                             | ---       | 1.98  | 7.47  | 50.63 | 4.55E-03 |
| 1448889_at   | Slc38a4                | solute carrier family 38, member 4                              | 69354     | 2.41  | 7.59  | 49.35 | 4.90E-04 |
| 1430073_at   | 2900016B01Rik          | RIKEN cDNA 2900016B01 gene                                      | 67262     | 4.64  | 10.80 | 49.31 | 3.82E-04 |
| 1437559_at   | Rgs7bp                 | regulator of G-protein signalling 7 binding protein             | 52882     | 0.64  | 5.73  | 48.85 | 6.85E-03 |
| 1460593_at   | Susd4                  | sushi domain containing 4                                       | 96935     | 2.21  | 7.78  | 48.31 | 4.12E-03 |
| 1420444_at   | Slc22a3                | solute carrier family 22 (organic cation transporter), member 3 | 20519     | 3.27  | 8.11  | 47.82 | 4.90E-04 |
| 1417494_a_at | Cp                     | ceruloplasmin                                                   | 12870     | 6.11  | 11.78 | 47.28 | 2.40E-06 |
| 1416693_at   | Foxc2                  | forkhead box C2                                                 | 14234     | 3.15  | 8.80  | 46.93 | 7.25E-03 |
| 1420484_a_at | Vtn                    | vitronectin                                                     | 22370     | 2.93  | 7.63  | 46.08 | 1.38E-03 |
| 1422860_at   | Nts                    | neurotensin                                                     | 67405     | 3.75  | 8.99  | 45.87 | 5.94E-03 |
| 1417495_x_at | Cp                     | ceruloplasmin                                                   | 12870     | 5.93  | 11.88 | 44.72 | 2.31E-04 |
| 1429209_at   | Col23a1                | collagen, type XXIII, alpha 1                                   | 237759    | 2.73  | 8.04  | 44.64 | 2.09E-03 |
| 1418606_at   | Hoxd10                 | homeo box D10                                                   | 15430     | 3.89  | 8.21  | 44.32 | 2.91E-03 |
| 1452408_at   | ---                    | ---                                                             | 436440    | 1.70  | 6.46  | 43.94 | 5.33E-03 |
| 1427140_at   | Pvt1                   | plasmacytoma variant translocation 1                            | 19296     | -0.64 | 5.84  | 43.61 | 7.49E-03 |
| 1430119_at   | Fndc1                  | fibronectin type III domain containing 1                        | 68655     | 0.91  | 6.59  | 43.35 | 3.45E-03 |
| 1445888_x_at | Parp3                  | poly (ADP-ribose) polymerase family, member 3                   | 235587    | 2.27  | 8.34  | 42.90 | 4.07E-03 |
| 1434265_s_at | Ank2                   | ankyrin 2, brain                                                | 109676    | 2.23  | 7.48  | 42.72 | 3.74E-04 |
| 1435465_at   | Ktbd11                 | kelch repeat and BTB (POZ) domain containing 11                 | 74901     | 6.17  | 11.62 | 42.64 | 6.21E-03 |
| 1456250_x_at | Tgfb1                  | transforming growth factor, beta induced                        | 21810     | 6.26  | 11.14 | 42.28 | 5.63E-04 |
| 1425779_a_at | Tbx1                   | T-box 1                                                         | 21380     | 3.97  | 9.16  | 41.85 | 7.01E-03 |
| 1455098_a_at | Vtn                    | vitronectin                                                     | 22370     | 2.51  | 7.22  | 41.56 | 1.80E-03 |
| 1430543_at   | Clip3                  | CAP-GLY domain containing linker protein 3                      | 76686     | 3.19  | 8.18  | 40.85 | 1.06E-03 |
| 1426044_a_at | Prkcc                  | protein kinase C, theta                                         | 18761     | 2.24  | 7.57  | 40.54 | 7.80E-04 |
| 1419100_at   | Serpina3n              | serine (or cysteine) peptidase inhibitor, clade A, member 3N    | 20716     | 2.49  | 7.56  | 40.11 | 2.95E-04 |
| 1448158_at   | Sdc1                   | syndecan 1                                                      | 20969     | 3.38  | 7.03  | 39.75 | 7.07E-03 |
| 1455556_at   | Notch2                 | Notch gene homolog 2 (Drosophila)                               | 18129     | 5.65  | 10.99 | 37.35 | 7.66E-03 |
| 1424450_at   | Gprc5c                 | G protein-coupled receptor, family C, group 5, member C         | 70355     | 2.22  | 6.74  | 37.29 | 1.63E-03 |
| 1428136_at   | Sfrp1                  | secreted frizzled-related protein 1                             | 20377     | 2.06  | 6.65  | 37.28 | 2.09E-03 |
| 1454974_at   | Ntn1                   | netrin 1                                                        | 18208     | 6.05  | 11.45 | 36.39 | 3.01E-04 |
| 1436658_at   | B130024G19Rik          | RIKEN cDNA B130024G19 gene                                      | 434198    | 0.91  | 5.07  | 36.02 | 1.63E-03 |
| 1430313_at   | Adamts1                | ADAMTS-like 1                                                   | 77739     | 3.06  | 8.03  | 35.71 | 7.26E-03 |
| 1448123_s_at | Tgfb1                  | transforming growth factor, beta induced                        | 21810     | 6.24  | 11.60 | 34.41 | 1.79E-04 |
| 1429946_at   | 2610301F02Rik          | RIKEN cDNA 2610301F02 gene                                      | 545428    | 0.94  | 6.43  | 33.95 | 2.58E-04 |
| 1432028_at   | Rab11fp2               | RAB11 family interacting protein 2 (class I)                    | 74998     | 1.24  | 6.05  | 33.83 | 3.14E-04 |
| 1452655_at   | Zdhhc2                 | zinc finger, DHHC domain containing 2                           | 70546     | 1.14  | 5.78  | 33.57 | 6.82E-03 |
| 1441610_at   | LOC100044356 // N28178 | similar to mKAA1045 protein /// expressed sequence N28178       | 100044356 | -0.05 | 5.24  | 33.56 | 6.26E-03 |
| 1437081_at   | Timp2                  | Tissue inhibitor of metalloproteinase 2                         | 21858     | 5.03  | 10.05 | 33.32 | 4.48E-04 |
| 1416159_at   | Nr2f2                  | nuclear receptor subfamily 2, group F, member 2                 | 11819     | 4.89  | 10.41 | 33.27 | 5.56E-04 |
| 1447520_at   | Lbp                    | lipopolysaccharide binding protein                              | 16803     | 2.13  | 7.78  | 32.71 | 3.20E-04 |
| 1417343_at   | Fxyd6                  | FXYD domain-containing ion transport regulator 6                | 59095     | 5.21  | 10.18 | 32.48 | 7.90E-04 |
| 1426981_at   | Pcsk6                  | proprotein convertase subtilisin/kexin type 6                   | 18553     | 5.20  | 10.29 | 32.44 | 3.96E-03 |
| 1455049_at   | Igslf3                 | immunoglobulin superfamily, member 3                            | 78908     | 4.32  | 8.67  | 31.70 | 1.91E-03 |

|              |               |                                                                                        |           |      |       |       |          |
|--------------|---------------|----------------------------------------------------------------------------------------|-----------|------|-------|-------|----------|
| 1429466_s_at | Aph1b         | anterior pharynx defective 1b homolog (C. elegans)                                     | 208117    | 4.09 | 9.14  | 31.62 | 1.20E-04 |
| 1437463_x_at | Tgfb1         | transforming growth factor, beta induced                                               | 21810     | 6.10 | 10.78 | 30.86 | 1.00E-04 |
| 1420871_at   | Gucy1b3       | guanylate cyclase 1, soluble, beta 3                                                   | 54195     | 5.23 | 9.78  | 30.12 | 1.28E-04 |
| 1416322_at   | Prep1         | proline arginine-rich end leucine-rich repeat                                          | 116847    | 7.77 | 12.83 | 30.11 | 9.33E-04 |
| 1449038_at   | Hsd11b1       | hydroxysteroid 11-beta dehydrogenase 1                                                 | 15483     | 2.95 | 7.06  | 29.26 | 1.76E-03 |
| 1458954_at   | 621580        | Predicted gene, 621580                                                                 | 621580    | 2.98 | 8.03  | 28.79 | 7.00E-04 |
| 1439223_at   | Tmod2         | tropomodulin 2                                                                         | 50876     | 2.68 | 7.54  | 28.57 | 4.77E-03 |
| 1447938_at   | Gm2172        | predicted gene 2172                                                                    | 100039344 | 2.72 | 7.97  | 28.32 | 3.29E-03 |
| 1416548_at   | Slc35b4       | solute carrier family 35, member B4                                                    | 58246     | 1.48 | 5.64  | 28.22 | 6.38E-03 |
| 1447848_at   | Eps151        | epidermal growth factor receptor pathway substrate 15-like 1                           | 13859     | 3.28 | 7.86  | 28.17 | 4.84E-03 |
| 1417577_at   | Trpc3         | transient receptor potential cation channel, subfamily C, member 3                     | 22065     | 2.10 | 6.74  | 28.12 | 3.73E-04 |
| 1433719_at   | Slc9a9        | solute carrier family 9 (sodium/hydrogen exchanger), member 9                          | 331004    | 2.02 | 7.79  | 28.11 | 6.88E-03 |
| 1419161_a_at | Nox4          | NADPH oxidase 4                                                                        | 50490     | 1.18 | 5.88  | 27.59 | 2.59E-04 |
| 1456500_at   | Aph1b         | anterior pharynx defective 1b homolog (C. elegans)                                     | 208117    | 4.98 | 9.71  | 27.00 | 1.80E-03 |
| 1435842_at   | Nat8l         | N-acetyltransferase 8-like                                                             | 269642    | 2.39 | 7.39  | 26.85 | 3.39E-03 |
| 1453102_at   | Flrt3         | fibronectin leucine rich transmembrane protein 3                                       | 71436     | 3.50 | 7.58  | 26.81 | 7.51E-03 |
| 1441411_at   | Lims1         | LIM and senescent cell antigen-like domains 1                                          | 110829    | 0.65 | 5.17  | 26.80 | 4.24E-03 |
| 1451119_a_at | Fbln1         | fibulin 1                                                                              | 14114     | 4.76 | 8.75  | 26.66 | 2.25E-03 |
| 1442144_at   | Emid1         | EMI domain containing 1                                                                | 140703    | 1.35 | 6.65  | 26.43 | 5.64E-04 |
| 1419527_at   | Comp          | cartilage oligomeric matrix protein                                                    | 12845     | 4.32 | 8.85  | 26.40 | 3.36E-04 |
| 1448194_a_at | H19           | H19 fetal liver mRNA                                                                   | 14955     | 2.07 | 6.32  | 25.45 | 2.31E-03 |
| 1423153_x_at | Cfh           | complement component factor h                                                          | 12628     | 3.84 | 8.56  | 25.34 | 2.42E-05 |
| 1454314_at   | 4930578G10Rik | RIKEN cDNA 4930578G10 gene                                                             | 75952     | 1.97 | 6.87  | 25.17 | 2.41E-03 |
| 1437697_at   | Rad23a        | RAD23a homolog (S. cerevisiae)                                                         | 19358     | 1.13 | 5.32  | 24.84 | 8.79E-03 |
| 1452946_a_at | Rftn2         | raftin family member 2                                                                 | 74013     | 5.14 | 9.34  | 24.69 | 3.33E-03 |
| 1446094_at   | ---           | ---                                                                                    | ---       | ---  | 5.13  | 24.61 | 2.05E-04 |
| 1423537_at   | Gap43         | growth associated protein 43                                                           | 14432     | 1.47 | 6.23  | 24.52 | 4.07E-03 |
| 1426955_at   | Col18a1       | collagen, type XVIII, alpha 1                                                          | 12822     | 5.60 | 10.43 | 24.49 | 7.69E-04 |
| 1451264_at   | Frdm6         | FERM domain containing 6                                                               | 319710    | 3.29 | 7.38  | 24.28 | 4.06E-03 |
| 1455393_at   | Cp            | ceruloplasmin                                                                          | 12870     | 6.86 | 11.56 | 23.92 | 8.67E-06 |
| 1440884_s_at | A530047J11Rik | RIKEN cDNA A530047J11 gene                                                             | 103767    | 1.52 | 5.61  | 23.21 | 5.70E-04 |
| 1431322_at   | IgSF3         | immunoglobulin superfamily, member 3                                                   | 78908     | 2.64 | 6.97  | 22.95 | 2.38E-03 |
| 1442063_at   | Adamts1       | ADAMTS-like 1                                                                          | 77739     | 3.43 | 8.26  | 22.71 | 6.22E-03 |
| 1440911_at   | Col23a1       | collagen, type XXIII, alpha 1                                                          | 237759    | 4.13 | 7.90  | 22.49 | 2.45E-03 |
| 1451838_a_at | Tc2n          | tandem C2 domains, nuclear                                                             | 74413     | 3.59 | 7.88  | 22.31 | 2.30E-03 |
| 1435060_at   | Tmod2         | tropomodulin 2                                                                         | 50876     | 4.41 | 8.39  | 22.17 | 3.05E-03 |
| 1455796_x_at | Olfm1         | olfactomedin 1                                                                         | 56177     | 7.11 | 11.60 | 22.14 | 6.93E-04 |
| 1434891_at   | Ptgrn         | prostaglandin F2 receptor negative regulator                                           | 19221     | 5.99 | 10.49 | 22.00 | 5.15E-03 |
| 1431424_at   | 2810055G20Rik | RIKEN cDNA 2810055G20 gene                                                             | 77994     | 2.46 | 7.06  | 21.67 | 1.41E-03 |
| 1421096_at   | Trpc1         | transient receptor potential cation channel, subfamily C, member 1                     | 22063     | 1.55 | 6.05  | 21.27 | 1.66E-03 |
| 1457681_at   | 2610301F02Rik | RIKEN cDNA 2610301F02 gene                                                             | 545428    | 3.11 | 7.17  | 20.91 | 1.33E-03 |
| 1435793_at   | Aph1b         | anterior pharynx defective 1b homolog (C. elegans)                                     | 208117    | 6.34 | 10.57 | 20.00 | 2.36E-03 |
| 1426217_at   | Tmem216       | transmembrane protein 216                                                              | 68642     | 0.67 | 5.09  | 20.00 | 5.28E-03 |
| 1425784_a_at | Olfm1         | olfactomedin 1                                                                         | 56177     | 5.31 | 9.20  | 19.49 | 3.90E-03 |
| 1436868_at   | Rtn4r1        | reticulum 4 receptor-like 1                                                            | 237847    | 3.67 | 7.76  | 19.15 | 8.95E-04 |
| 1447222_at   | Hspa12a       | heat shock protein 12A                                                                 | 73442     | 3.10 | 6.84  | 19.02 | 3.76E-03 |
| 1436861_at   | Il7           | interleukin 7                                                                          | 16196     | 4.20 | 8.28  | 18.94 | 1.75E-04 |
| 1453831_at   | Tmem138       | transmembrane protein 138                                                              | 72982     | 1.92 | 5.98  | 18.80 | 2.38E-03 |
| 1428803_at   | Acolf6        | acyl-CoA thioesterase 6                                                                | 217700    | 1.68 | 5.23  | 18.60 | 8.33E-03 |
| 1435657_at   | ---           | ---                                                                                    | ---       | ---  | 5.10  | 18.56 | 2.96E-04 |
| 1447250_a_at | 2610301F02Rik | RIKEN cDNA 2610301F02 gene                                                             | 545428    | 3.11 | 7.47  | 18.56 | 9.12E-03 |
| 1460412_at   | Fbln7         | fibulin 7                                                                              | 70370     | 3.07 | 6.58  | 18.46 | 3.79E-03 |
| 1443821_at   | ---           | ---                                                                                    | ---       | ---  | 2.87  | 18.29 | 2.17E-03 |
| 1458370_at   | Bmp2k         | BMP2 inducible kinase                                                                  | 140780    | 5.41 | 9.59  | 18.25 | 2.55E-05 |
| 1427288_at   | Apba2         | amyloid beta (A4) precursor protein-binding, family A, member 2                        | 11784     | 1.93 | 5.94  | 18.02 | 3.10E-03 |
| 1455048_at   | IgSF3         | immunoglobulin superfamily, member 3                                                   | 78908     | 3.91 | 7.95  | 17.89 | 6.03E-03 |
| 1420150_at   | Spsb1         | splA/ryanodine receptor domain and SOCS box containing 1                               | 74646     | 5.32 | 9.60  | 17.70 | 5.78E-03 |
| 1452590_a_at | Plac9         | placenta specific 9                                                                    | 211623    | 9.47 | 13.70 | 17.50 | 1.38E-05 |
| 1451542_at   | Ssbp2         | single-stranded DNA binding protein 2                                                  | 66970     | 2.67 | 6.29  | 17.44 | 3.33E-04 |
| 1429310_at   | Flrt3         | fibronectin leucine rich transmembrane protein 3                                       | 23767     | 3.31 | 6.96  | 17.26 | 4.92E-03 |
| 1422510_at   | Ctdspl        | CTD (carboxy-terminal domain, RNA polymerase II, polypeptide A) small phosphatase-like | 69274     | 5.35 | 9.07  | 17.01 | 1.37E-04 |
| 1436475_at   | Nr2f2         | nuclear receptor subfamily 2, group F, member 2                                        | 11819     | 3.82 | 7.61  | 16.82 | 4.55E-03 |
| 1416625_at   | Serpig1       | serine (or cysteine) peptidase inhibitor, clade G, member 1                            | 12258     | 6.60 | 10.72 | 16.68 | 1.16E-04 |
| 1420930_s_at | Ctnn1         | catenin (cadherin associated protein), alpha-like 1                                    | 54366     | 3.90 | 7.63  | 16.59 | 3.77E-03 |
| 1417636_at   | Slc6a9        | solute carrier family 6 (neurotransmitter transporter, glycine), member 9              | 14664     | 5.29 | 8.71  | 16.33 | 9.01E-04 |
| 1418237_s_at | Col18a1       | collagen, type XVIII, alpha 1                                                          | 12822     | 6.09 | 9.48  | 16.30 | 8.31E-03 |
| 1455685_at   | Mical2        | microtubule associated monooxygenase, calponin and LIM domain containing 2             | 320878    | 5.72 | 10.18 | 16.11 | 2.98E-03 |
| 1435214_at   | Gjc2          | gap junction protein, gamma 2                                                          | 118454    | 1.58 | 5.54  | 16.08 | 7.65E-04 |
| 1435907_at   | Nrxn2         | neurexin II                                                                            | 18190     | 2.32 | 5.87  | 15.99 | 2.72E-04 |
| 1447939_a_at | Gm2172        | predicted gene 2172                                                                    | 100039344 | 4.32 | 8.47  | 15.78 | 7.58E-04 |
| 1433647_s_at | Rhobtb3       | Rho-related BTB domain containing 3                                                    | 73296     | 1.57 | 5.80  | 15.77 | 3.90E-03 |
| 1447937_a_at | Gm2172        | predicted gene 2172                                                                    | 100039344 | 4.67 | 8.73  | 15.75 | 9.30E-05 |
| 1437057_at   | Megf6         | multiple EGF-like-domains 6                                                            | 230971    | 2.98 | 6.82  | 15.64 | 1.66E-03 |
| 1448383_at   | Mmp14         | matrix metalloproteinase 14 (membrane-inserted)                                        | 17387     | 4.97 | 8.40  | 15.54 | 1.12E-03 |



|              |               |                                                                                                                  |        |      |       |       |          |
|--------------|---------------|------------------------------------------------------------------------------------------------------------------|--------|------|-------|-------|----------|
| 1420823_at   | Sema4d        | sema domain, immunoglobulin domain (Ig), transmembrane domain (TM) and short cytoplasmic domain, (semaphorin) 4D | 20354  | 2.07 | 5.63  | 15.47 | 3.40E-03 |
| 1449123_at   | Itih3         | inter-alpha trypsin inhibitor, heavy chain 3                                                                     | 16426  | 4.22 | 7.41  | 15.30 | 5.37E-03 |
| 1448175_at   | Ehd1          | EH-domain containing 1                                                                                           | 13660  | 6.26 | 10.40 | 15.23 | 2.13E-04 |
| 1439078_at   | Klhl4         | kelch-like 4 (Drosophila)                                                                                        | 237010 | 5.64 | 9.33  | 15.20 | 3.90E-04 |
| 1436819_at   | Sep6          | septin 6                                                                                                         | 56526  | 4.31 | 8.44  | 15.07 | 6.07E-03 |
| 1425475_at   | Col4a5        | collagen, type IV, alpha 5                                                                                       | 12830  | 2.43 | 6.61  | 15.06 | 9.03E-04 |
| 1443029_at   | Ppfbp1        | PTPRF interacting protein, binding protein 1 (liprin beta 1)                                                     | 67533  | 2.46 | 5.83  | 15.05 | 8.14E-03 |
| 1449106_at   | Gpx3          | glutathione peroxidase 3                                                                                         | 14778  | 4.44 | 8.98  | 14.92 | 8.54E-03 |
| 1419746_at   | 4933428G20Rik | RIKEN cDNA 4933428G20 gene                                                                                       | 58996  | 1.69 | 5.73  | 14.81 | 1.16E-04 |
| 1451889_at   | Notch2        | Notch gene homolog 2 (Drosophila)                                                                                | 18129  | 4.96 | 8.55  | 14.80 | 5.08E-04 |
| 1437419_at   | Bmp2k         | BMP2 inducible kinase                                                                                            | 140780 | 4.48 | 8.43  | 14.24 | 6.71E-05 |
| 1420824_at   | Sema4d        | sema domain, immunoglobulin domain (Ig), transmembrane domain (TM) and short cytoplasmic domain, (semaphorin) 4D | 20354  | 4.57 | 8.68  | 14.11 | 4.83E-03 |
| 1440159_at   | 1700010B09Rik | RIKEN cDNA 1700010B09 gene                                                                                       | 69341  | 2.15 | 6.16  | 14.00 | 7.37E-03 |
| 1431810_a_at | Tmco4         | transmembrane and coiled-coil domains 4                                                                          | 77056  | 2.74 | 6.52  | 13.83 | 2.41E-04 |
| 1457222_at   | Creb5         | cAMP responsive element binding protein 5                                                                        | 231991 | 5.31 | 8.38  | 13.38 | 9.60E-03 |
| 1425749_at   | Stxbp6        | syntaxin binding protein 6 (amisyn)                                                                              | 217517 | 4.12 | 7.51  | 13.28 | 1.22E-03 |
| 1437017_at   | AI480653      | expressed sequence AI480653                                                                                      | 268880 | 1.72 | 5.12  | 12.85 | 7.25E-03 |
| 1453191_at   | Col27a1       | collagen, type XXVII, alpha 1                                                                                    | 373864 | 1.37 | 5.53  | 12.83 | 5.38E-03 |
| 1415922_s_at | Marcks1       | MARCKS-like 1                                                                                                    | 17357  | 4.19 | 7.26  | 12.74 | 7.95E-03 |
| 1433776_at   | Lhfp          | lipoma HMGIC fusion partner                                                                                      | 108927 | 5.97 | 9.72  | 12.66 | 1.60E-03 |
| 1422137_at   | Duoxa2        | dual oxidase maturation factor 2                                                                                 | 66811  | 2.19 | 5.59  | 12.45 | 7.41E-03 |
| 1444073_at   | Maf           | avian musculoaponeurotic fibrosarcoma (v-maf) AS42 oncogene homolog                                              |        | 4.31 | 8.01  | 12.38 | 2.03E-04 |
| 1436978_at   | Wnt9a         | wingless-type MMTV integration site 9A                                                                           | 216795 | 3.74 | 7.91  | 12.18 | 9.54E-03 |
| 1448534_at   | Sirpa         | signal-regulatory protein alpha                                                                                  | 19261  | 5.60 | 9.29  | 12.09 | 2.37E-03 |
| 1420860_at   | Itga9         | integrin alpha 9                                                                                                 | 104099 | 6.00 | 9.36  | 11.97 | 9.09E-03 |
| 1452295_at   | Pmepa1        | prostate transmembrane protein, androgen induced 1                                                               | 65112  | 2.79 | 5.83  | 11.84 | 2.67E-03 |
| 1451693_a_at | Fgf12         | fibroblast growth factor 12                                                                                      | 14167  | 3.82 | 8.02  | 11.83 | 2.17E-03 |
| 1452398_at   | Plce1         | phospholipase C, epsilon 1                                                                                       | 74055  | 4.00 | 7.72  | 11.82 | 5.12E-03 |
| 1416371_at   | Apod          | apolipoprotein D                                                                                                 | 11815  | 4.26 | 8.07  | 11.75 | 3.71E-04 |
| 1450627_at   | Ank           | progressive ankylosis                                                                                            | 11732  | 4.06 | 8.04  | 11.64 | 4.77E-03 |
| 1423055_at   | Nsg1          | neuron specific gene family member 1                                                                             | 18196  | 5.73 | 9.15  | 11.60 | 1.25E-03 |
| 1456130_at   | LOC553091     | hypothetical LOC553091                                                                                           | 553091 | 5.24 | 8.43  | 11.45 | 7.07E-04 |
| 1416892_s_at | 3110001A13Rik | RIKEN cDNA 3110001A13 gene                                                                                       | 66540  | 4.96 | 8.62  | 11.44 | 3.77E-03 |
| 1453445_at   | 9030601B04Rik | RIKEN cDNA 9030601B04 gene                                                                                       | 71511  | 3.20 | 6.79  | 11.44 | 9.80E-03 |
| 1460287_at   | Timp2         | tissue inhibitor of metalloproteinase 2                                                                          | 21858  | 8.46 | 12.10 | 11.42 | 2.19E-04 |
| 1448931_at   | F2r1          | coagulation factor II (thrombin) receptor-like 1                                                                 | 14063  | 6.29 | 10.22 | 11.27 | 5.77E-03 |
| 1460732_a_at | Ppl           | periplakin                                                                                                       | 19041  | 3.07 | 6.28  | 11.24 | 9.83E-03 |
| 1433662_s_at | Timp2         | tissue inhibitor of metalloproteinase 2                                                                          | 21858  | 8.82 | 12.51 | 11.21 | 4.43E-04 |
| 1436246_at   | ---           | ---                                                                                                              |        | 3.34 | 6.82  | 10.89 | 7.62E-03 |
| 1452384_at   | Enpp3         | ectonucleotide pyrophosphatase/phosphodiesterase 3                                                               | 209558 | 4.80 | 8.26  | 10.77 | 2.21E-03 |
| 1418595_at   | S3-12         | plasma membrane associated protein, S3-12                                                                        | 57435  | 1.65 | 5.45  | 10.60 | 2.99E-03 |
| 1453481_at   | Zdhhc2        | zinc finger, DHHC domain containing 2                                                                            | 70546  | 3.93 | 7.50  | 10.60 | 8.81E-03 |
| 1442841_at   | ---           | ---                                                                                                              |        | 1.25 | 5.24  | 10.60 | 4.32E-03 |
| 1419193_a_at | Gmfg          | glia maturation factor, gamma                                                                                    | 63986  | 5.04 | 9.03  | 10.56 | 5.02E-03 |
| 1420534_at   | Gucy1a3       | guanylate cyclase 1, soluble, alpha 3                                                                            | 60596  | 7.97 | 11.54 | 10.54 | 8.12E-04 |
| 1460242_at   | Cd55          | CD55 antigen                                                                                                     | 13136  | 6.85 | 10.39 | 10.53 | 1.02E-04 |
| 1459317_at   | Ank2          | ankyrin 2, brain                                                                                                 | 109676 | 2.06 | 5.26  | 10.48 | 8.17E-03 |
| 1432216_s_at | Mpp7          | membrane protein, palmitoylated 7 (MAGUK p5 subfamily member 7)                                                  | 75739  | 5.87 | 9.86  | 10.45 | 5.61E-03 |
| 1424902_at   | Plexdc1       | plexin domain containing 1                                                                                       | 72324  | 3.99 | 7.21  | 10.31 | 4.87E-03 |
| 1435396_at   | Stxbp6        | syntaxin binding protein 6 (amisyn)                                                                              | 217517 | 6.69 | 9.52  | 10.26 | 8.89E-03 |
| 1419693_at   | Colec12       | collectin sub-family member 12                                                                                   | 140792 | 3.09 | 6.74  | 10.16 | 1.32E-03 |
| 1435908_at   | Nrxn2         | neurexin II                                                                                                      | 18190  | 4.95 | 8.42  | 10.16 | 6.46E-04 |
| 1415691_at   | Dlg1          | discs, large homolog 1 (Drosophila)                                                                              | 13383  | 7.36 | 10.81 | 10.12 | 4.71E-03 |
| 1420533_at   | Gucy1a3       | guanylate cyclase 1, soluble, alpha 3                                                                            | 60596  | 7.58 | 10.98 | 10.06 | 2.51E-03 |
| 1460223_a_at | Epb4.9        | erythrocyte protein band 4.9                                                                                     | 13829  | 4.75 | 7.45  | 9.93  | 7.78E-03 |
| 1434141_at   | Gucy1a3       | guanylate cyclase 1, soluble, alpha 3                                                                            | 60596  | 6.93 | 10.22 | 9.83  | 2.83E-03 |
| 1453343_s_at | Vrk2          | vaccinia related kinase 2                                                                                        | 69922  | 1.64 | 5.03  | 9.75  | 3.50E-03 |
| 1416011_x_at | Ehd1          | EH-domain containing 1                                                                                           | 13660  | 6.86 | 10.36 | 9.74  | 2.49E-03 |
| 1449531_at   | Leprel2       | leprecan-like 2                                                                                                  | 14789  | 3.65 | 6.71  | 9.60  | 7.93E-03 |
| 1454677_at   | Timp2         | tissue inhibitor of metalloproteinase 2                                                                          | 21858  | 8.79 | 12.15 | 9.58  | 1.09E-03 |
| 1455033_at   | B430201A12Rik | RIKEN cDNA B430201A12 gene                                                                                       | 329739 | 6.37 | 9.10  | 9.30  | 6.59E-03 |
| 1420859_at   | Pkia          | protein kinase inhibitor, alpha                                                                                  | 18767  | 4.82 | 7.71  | 9.23  | 1.27E-03 |
| 1450040_at   | Timp2         | tissue inhibitor of metalloproteinase 2                                                                          | 21858  | 8.76 | 12.17 | 9.15  | 1.93E-03 |
| 1419194_s_at | Gmfg          | glia maturation factor, gamma                                                                                    | 63986  | 6.09 | 8.99  | 9.05  | 2.81E-03 |
| 1434542_at   | Gpt2          | glutamic pyruvate transaminase (alanine aminotransferase) 2                                                      | 108682 | 3.82 | 6.33  | 8.98  | 2.87E-03 |
| 1440096_at   | Ecm2          | extracellular matrix protein 2, female organ and adipocyte specific                                              | 407800 | 4.19 | 7.69  | 8.96  | 2.07E-03 |
| 1449073_at   | FlnC          | filamin C, gamma (actin binding protein 280)                                                                     | 68794  | 4.87 | 8.10  | 8.95  | 2.82E-03 |
| 1450199_a_at | Stab1         | stabilin 1                                                                                                       | 192187 | 7.58 | 10.64 | 8.88  | 3.54E-06 |
| 1416713_at   | Tppp3         | tubulin polymerization-promoting protein family member 3                                                         | 67971  | 7.05 | 10.10 | 8.73  | 3.76E-03 |
| 1449815_a_at | Ssbp2         | single-stranded DNA binding protein 2                                                                            | 66970  | 4.95 | 8.18  | 8.72  | 1.23E-03 |
| 1435092_at   | Ar14a         | ADP-ribosylation factor-like 4A                                                                                  | 11861  | 7.58 | 10.67 | 8.65  | 1.50E-05 |
| 1456721_at   | Thsd7a        | thrombospondin, type I, domain containing 7A                                                                     | 330267 | 5.60 | 9.16  | 8.64  | 2.52E-03 |
| 1436876_at   | Rgs7bp        | regulator of G-protein signalling 7 binding protein                                                              | 52882  | 4.51 | 7.15  | 8.57  | 6.81E-03 |
| 1416158_at   | Nr2f2         | nuclear receptor subfamily 2, group F, member 2                                                                  | 11819  | 8.64 | 11.93 | 8.52  | 4.31E-03 |
| 1452654_at   | Zdhhc2        | zinc finger, DHHC domain containing 2                                                                            | 70546  | 5.07 | 8.19  | 8.52  | 1.34E-04 |
| 1438231_at   | Foxp2         | forkhead box P2                                                                                                  | 114142 | 2.69 | 5.49  | 8.50  | 2.55E-03 |
| 1434826_at   | B430201A12Rik | RIKEN cDNA B430201A12 gene                                                                                       | 329739 | 6.51 | 9.31  | 8.50  | 3.66E-04 |

|              |               |                                                                           |        |      |       |      |          |
|--------------|---------------|---------------------------------------------------------------------------|--------|------|-------|------|----------|
| 1451658_a_at | Poir3c        | polymerase (RNA) III (DNA directed) polypeptide C                         | 74414  | 4.66 | 7.65  | 8.50 | 3.12E-03 |
| 1421319_at   | Ptgfrn        | prostaglandin F2 receptor negative regulator                              | 19221  | 4.74 | 7.49  | 8.49 | 1.02E-03 |
| 1428579_at   | Fmnl2         | formin-like 2                                                             | 71409  | 6.72 | 9.81  | 8.42 | 6.98E-04 |
| 1454158_at   | Mpp7          | membrane protein, palmitoylated 7 (MAGUK p55 subfamily member 7)          | 75739  | 6.74 | 9.90  | 8.41 | 5.71E-03 |
| 1448509_at   | 3110001A13Rik | RIKEN cDNA 3110001A13 gene                                                | 66540  | 4.24 | 7.42  | 8.28 | 2.11E-03 |
| 1438937_x_at | Ang           | angiogenin, ribonuclease, RNase A family, 5                               | 11727  | 5.74 | 8.69  | 8.18 | 5.90E-03 |
| 1439995_at   | Nhedc2        | Na+/H+ exchanger domain containing 2                                      | 97086  | 3.03 | 6.03  | 8.16 | 4.60E-03 |
| 1418770_at   | Cd2           | CD2 antigen                                                               | 12481  | 5.12 | 8.32  | 8.16 | 9.91E-03 |
| 1426584_a_at | Sord          | sorbitol dehydrogenase                                                    | 20322  | 5.24 | 8.15  | 8.16 | 4.01E-03 |
| 1447602_x_at | Sulf2         | sulfatase 2                                                               | 72043  | 6.08 | 9.08  | 7.99 | 2.17E-03 |
| 1455697_at   | ---           | ---                                                                       | ---    | 4.40 | 7.07  | 7.89 | 2.10E-04 |
| 1449270_at   | Plxdc2        | plexin domain containing 2                                                | 67448  | 2.86 | 5.93  | 7.79 | 5.92E-03 |
| 1435090_at   | Tubgcp6       | tubulin, gamma complex associated protein 6                               | 328580 | 2.40 | 5.35  | 7.76 | 7.40E-03 |
| 1450132_at   | Hivep3        | human immunodeficiency virus type I enhancer binding protein 3            | 16656  | 3.71 | 6.59  | 7.75 | 6.06E-04 |
| 1455179_at   | Mpp7          | membrane protein, palmitoylated 7 (MAGUK p55 subfamily member 7)          | 75739  | 5.58 | 9.14  | 7.73 | 4.74E-03 |
| 1437167_at   | Tmod2         | tropomodulin 2                                                            | 50876  | 4.34 | 7.14  | 7.59 | 5.25E-03 |
| 1428020_at   | Bxdc5         | brix domain containing 5                                                  | 70285  | 3.03 | 6.29  | 7.54 | 5.73E-03 |
| 1437279_x_at | Sdc1          | syndecan 1                                                                | 20969  | 8.56 | 11.27 | 7.51 | 3.02E-03 |
| 1427574_s_at | Sh3d19        | SH3 domain protein D19                                                    | 27059  | 5.18 | 8.29  | 7.50 | 2.54E-03 |
| 1456160_at   | ---           | ---                                                                       | ---    | 4.56 | 7.68  | 7.49 | 7.48E-03 |
| 1448561_at   | Ncf2          | neutrophil cytosolic factor 2                                             | 17970  | 5.69 | 8.48  | 7.46 | 2.00E-03 |
| 1416893_at   | 3110001A13Rik | RIKEN cDNA 3110001A13 gene                                                | 66540  | 7.12 | 9.46  | 7.42 | 2.12E-03 |
| 1444052_at   | ---           | ---                                                                       | ---    | 9.88 | 12.78 | 7.39 | 1.89E-04 |
| 1435987_x_at | 1110059G02Rik | RIKEN cDNA 1110059G02 gene                                                | 68786  | 2.44 | 5.67  | 7.39 | 5.60E-03 |
| 1432498_at   | 1700020C07Rik | RIKEN cDNA 1700020C07 gene                                                | 75642  | 2.75 | 5.94  | 7.38 | 3.18E-03 |
| 1421002_at   | Angptl2       | angiopoietin-like 2                                                       | 26360  | 3.03 | 5.48  | 7.37 | 1.90E-03 |
| 1418936_at   | Maff          | v-maf musculoaponeurotic fibrosarcoma oncogene family, protein F (avian)  | 17133  | 7.19 | 10.02 | 7.37 | 7.60E-04 |
| 1416081_at   | Smad1         | MAD homolog 1 (Drosophila)                                                | 17125  | 5.12 | 7.47  | 7.36 | 7.62E-03 |
| 1422695_at   | Ttyh1         | tweety homolog 1 (Drosophila)                                             | 57776  | 3.47 | 6.00  | 7.35 | 6.88E-03 |
| 1442115_at   | 9430028L06Rik | RIKEN cDNA 9430028L06 gene                                                | 225617 | 7.39 | 10.20 | 7.29 | 5.50E-03 |
| 1448700_at   | G0s2          | G0/G1 switch gene 2                                                       | 14373  | 4.32 | 6.45  | 7.28 | 5.23E-03 |
| 1428789_at   | Ralgps2       | Ral GEF with PH domain and SH3 binding motif 2                            | 78255  | 4.91 | 8.11  | 7.15 | 4.42E-03 |
| 1453794_at   | Fer1l4        | fer-1-like 4 (C. elegans)                                                 | 74562  | 2.34 | 5.13  | 7.10 | 6.58E-03 |
| 1436937_at   | Rbms3         | RNA binding motif, single stranded interacting protein                    | 207181 | 4.25 | 6.61  | 7.09 | 4.13E-03 |
| 1429567_at   | Rassf10       | Ras association (RalGDS/AF-6) domain family (N-terminal) member 10        | 78748  | 4.83 | 7.28  | 7.08 | 1.62E-03 |
| 1450029_s_at | Itga9         | integrin alpha 9                                                          | 104099 | 7.81 | 10.86 | 7.00 | 1.76E-03 |
| 1453119_at   | Otud1         | OTU domain containing 1                                                   | 71198  | 9.23 | 11.52 | 6.94 | 5.70E-03 |
| 1435936_at   | Slc13a5       | solute carrier family 13 (sodium-dependent citrate transporter), member 5 | 237831 | 2.56 | 5.23  | 6.86 | 4.44E-03 |
| 1451154_a_at | Cugbp2        | CUG triplet repeat, RNA binding protein 2                                 | 14007  | 4.64 | 7.23  | 6.84 | 5.91E-04 |
| 1435728_at   | Tyw3          | tRNA-yW synthesizing protein 3 homolog (S. cerevisiae)                    | 209584 | 3.27 | 5.81  | 6.73 | 7.11E-03 |
| 1429456_a_at | Poir3e        | polymerase (RNA) III (DNA directed) polypeptide E                         | 26939  | 5.36 | 7.69  | 6.63 | 6.02E-03 |
| 1423434_at   | Tead1         | TEA domain family member 1                                                | 21676  | 6.77 | 8.93  | 6.52 | 8.28E-03 |
| 1431326_a_at | Tmod2         | tropomodulin 2                                                            | 50876  | 5.44 | 7.64  | 6.44 | 4.20E-03 |
| 1435830_a_at | 5430435G22Rik | RIKEN cDNA 5430435G22 gene                                                | 226421 | 2.83 | 5.86  | 6.39 | 1.19E-03 |
| 1450631_x_at | Defcr24       | defensin related cryptdin 24                                              | 503491 | 2.92 | 5.58  | 6.31 | 6.03E-03 |
| 1424764_at   | Sez6l         | seizure related 6 homolog like                                            | 56747  | 4.17 | 6.65  | 6.30 | 4.69E-03 |
| 1432296_a_at | Itgav         | integrin alpha V                                                          | 16410  | 4.72 | 7.33  | 6.27 | 9.35E-03 |
| 1425329_a_at | Cyb5r3        | cytochrome b5 reductase 3                                                 | 109754 | 7.20 | 9.80  | 6.19 | 9.68E-03 |
| 1429560_at   | Zfp422-rs1    | zinc finger protein 422, related sequence 1                               | 77652  | 5.26 | 7.90  | 6.16 | 5.50E-03 |
| 1429238_a_at | Ogfod2        | 2-oxoglutarate and iron-dependent oxygenase domain containing 2           | 66627  | 2.91 | 5.64  | 6.14 | 9.75E-03 |
| 1437058_at   | Megf6         | multiple EGF-like-domains 6                                               | 230971 | 6.56 | 9.32  | 5.95 | 4.95E-04 |
| 1424382_at   | Rcn3          | reticulocalbin 3, EF-hand calcium binding domain                          | 52377  | 6.20 | 8.91  | 5.92 | 1.61E-04 |
| 1448154_at   | Ndrp2         | N-myc downstream regulated gene 2                                         | 29811  | 7.08 | 9.72  | 5.89 | 1.22E-03 |
| 1451456_at   | 6430706D22Rik | RIKEN cDNA 6430706D22 gene                                                | 381280 | 5.40 | 8.02  | 5.83 | 5.56E-03 |
| 1434930_at   | Tpcn1         | two pore channel 1                                                        | 252972 | 9.49 | 12.21 | 5.67 | 1.43E-03 |
| 1424768_at   | Cald1         | caldesmon 1                                                               | 109624 | 7.30 | 9.57  | 5.66 | 3.30E-04 |
| 1452358_at   | Rai2          | retinoic acid induced 2                                                   | 24004  | 5.86 | 7.62  | 5.66 | 5.38E-03 |
| 1455630_at   | Dnalcl        | dynein, axonemal, light chain 1                                           | 105000 | 4.88 | 6.79  | 5.62 | 6.36E-03 |
| 1418701_at   | Comt1         | catechol-O-methyltransferase 1                                            | 12846  | 5.16 | 8.01  | 5.58 | 2.99E-03 |
| 1429028_at   | Dock11        | dedicator of cytokinesis 11                                               | 75974  | 4.69 | 6.97  | 5.57 | 4.12E-03 |
| 1426467_s_at | 0610037L13Rik | RIKEN cDNA 0610037L13 gene                                                | 74098  | 4.22 | 6.48  | 5.45 | 1.19E-03 |
| 1423627_at   | Nqo1          | NAD(P)H dehydrogenase, quinone 1                                          | 18104  | 7.47 | 9.48  | 5.26 | 3.85E-03 |
| 1423878_at   | Gypc          | glycophorin C                                                             | 71683  | 6.31 | 8.60  | 5.25 | 4.17E-04 |
| 1417069_a_at | Gmfb          | glia maturation factor, beta                                              | 63985  | 6.46 | 8.35  | 5.22 | 7.63E-03 |
| 1419405_at   | Nmb           | neuromedin B                                                              | 68039  | 4.75 | 7.06  | 5.22 | 8.45E-04 |
| 1416914_s_at | Mtvr2         | mammary tumor virus receptor 2                                            | 17826  | 4.44 | 6.86  | 5.18 | 1.91E-03 |
| 1433655_at   | Rnf141        | ring finger protein 141                                                   | 67150  | 5.57 | 7.72  | 5.16 | 3.70E-03 |
| 1423499_at   | Sncaip        | synuclein, alpha interacting protein (synphilin)                          | 67847  | 6.70 | 8.88  | 5.13 | 2.74E-03 |
| 1417148_at   | Pdgfrb        | platelet derived growth factor receptor, beta polypeptide                 | 18596  | 3.33 | 5.32  | 5.10 | 3.91E-03 |
| 1426374_at   | 2410166I05Rik | RIKEN cDNA 2410166I05 gene                                                | 76824  | 5.47 | 7.88  | 5.09 | 5.49E-04 |
| 1422034_a_at | Palm          | paralectin                                                                | 18483  | 6.47 | 8.55  | 5.07 | 6.04E-03 |
| 1416194_at   | Cyp4b1        | cytochrome P450, family 4, subfamily b, polypeptide 1                     | 13120  | 9.25 | 11.32 | 5.05 | 9.31E-04 |
| 1455607_at   | Rspo3         | R-spondin 3 homolog (Xenopus laevis)                                      | 72780  | 3.43 | 5.83  | 5.02 | 2.22E-03 |
| 1438232_at   | Foxp2         | forkhead box P2                                                           | 114142 | 4.39 | 7.24  | 5.00 | 4.77E-03 |
| 1450637_a_at | Aebp1         | AE binding protein 1                                                      | 11568  | 8.42 | 11.11 | 5.00 | 4.12E-03 |
| 1421967_at   | B4galt5       | UDP-Gal:betaGlcNAc beta 1,4-galactosyltransferase, polypeptide 5          | 56336  | 5.88 | 8.04  | 4.98 | 1.91E-03 |
| 1439316_at   | Rbm39         | RNA binding motif protein 39                                              | 170791 | 3.85 | 5.96  | 4.91 | 9.09E-03 |

|              |               |                                                                                   |           |       |       |      |          |
|--------------|---------------|-----------------------------------------------------------------------------------|-----------|-------|-------|------|----------|
| 1451008_at   | St8sia3       | ST8 alpha-N-acetyl-neuraminide alpha-2,8-sialyltransferase 3                      | 20451     | 3.19  | 5.54  | 4.90 | 5.33E-03 |
| 1454699_at   | Sesn1         | sestrin 1                                                                         | 140742    | 4.62  | 6.53  | 4.85 | 2.88E-03 |
| 1434513_at   | Atp13a3       | ATPase type 13A3                                                                  | 224088    | 6.53  | 8.54  | 4.84 | 7.82E-04 |
| 1433490_s_at | Epb4.1l2      | erythrocyte protein band 4.1-like 2                                               | 13822     | 8.42  | 10.58 | 4.78 | 2.41E-03 |
| 1419126_at   | Hoxd9         | homeo box D9                                                                      | 15438     | 8.00  | 10.14 | 4.77 | 1.09E-03 |
| 1454724_x_at | 5730446C15Rik | RIKEN cDNA 5730446C15 gene                                                        | 226016    | 7.62  | 9.75  | 4.76 | 3.86E-03 |
| 1452415_at   | Actn1         | actinin, alpha 1                                                                  | 109711    | 4.88  | 6.98  | 4.74 | 9.28E-03 |
| 1421442_at   | Flt4          | FMS-like tyrosine kinase 4                                                        | 14257     | 11.15 | 13.45 | 4.73 | 1.99E-04 |
| 1434011_a_at | Ints5         | integrator complex subunit 5                                                      | 109077    | 7.23  | 9.39  | 4.70 | 2.73E-03 |
| 1434307_at   | Tmem64        | transmembrane protein 64                                                          | 100201    | 5.35  | 7.45  | 4.69 | 4.60E-03 |
| 1441916_s_at | Odf3          | outer dense fiber of sperm tails 3                                                | 69287     | 2.75  | 5.08  | 4.61 | 7.21E-03 |
| 1452411_at   | Lrrc1         | leucine rich repeat containing 1                                                  | 214345    | 5.17  | 7.06  | 4.60 | 4.86E-03 |
| 1426342_at   | Stt3b         | STT3, subunit of the oligosaccharyltransferase complex, homolog B (S. cerevisiae) | 68292     | 8.98  | 11.12 | 4.59 | 1.36E-03 |
| 1448613_at   | Ecm1          | extracellular matrix protein 1                                                    | 13601     | 6.20  | 7.91  | 4.53 | 9.03E-03 |
| 1429796_at   | Kalrn         | kalirin, RhoGEF kinase                                                            | 545156    | 5.96  | 7.52  | 4.52 | 8.83E-03 |
| 1420228_at   | ---           | ---                                                                               | ---       | 3.27  | 5.40  | 4.51 | 6.55E-03 |
| 1422616_s_at | Wdr54         | WD repeat domain 54                                                               | 75659     | 3.48  | 5.34  | 4.50 | 7.79E-03 |
| 1426851_a_at | Nov           | nephroblastoma overexpressed gene                                                 | 18133     | 7.02  | 9.11  | 4.48 | 2.47E-03 |
| 1427201_at   | Mustn1        | musculoskeletal, embryonic nuclear protein 1                                      | 66175     | 6.32  | 8.24  | 4.42 | 4.67E-03 |
| 1426290_at   | Dimt1         | DIM1 dimethyladenosine transferase 1-like (S. cerevisiae)                         | 66254     | 4.34  | 6.34  | 4.21 | 4.10E-03 |
| 1422853_at   | Shc1          | src homology 2 domain-containing transforming protein C1                          | 20416     | 5.88  | 7.91  | 4.16 | 4.83E-03 |
| 1448134_at   | X99384        | cDNA sequence X99384                                                              | 27355     | 8.42  | 10.31 | 4.13 | 5.09E-03 |
| 1439251_at   | 100042616     | predicted gene, 100042616                                                         | 100042616 | 4.85  | 6.80  | 4.09 | 1.03E-03 |
| 1416414_at   | Emilin1       | elastin microfibril interfacier 1                                                 | 100952    | 5.48  | 7.27  | 4.08 | 7.59E-03 |
| 1418232_s_at | Lims1         | LIM and senescent cell antigen-like domains 1                                     | 110829    | 6.85  | 9.11  | 4.07 | 1.23E-03 |
| 1420919_at   | Sgk3          | serum/glucocorticoid regulated kinase 3                                           | 170755    | 5.78  | 7.86  | 4.04 | 3.12E-03 |
| 1421832_at   | Twsg1         | twisted gastrulation homolog 1 (Drosophila)                                       | 65960     | 7.86  | 10.26 | 4.02 | 8.17E-03 |
| 1419546_at   | Atp6v1c1      | ATPase, H+ transporting, lysosomal V1 subunit C1                                  | 66335     | 5.91  | 8.24  | 3.97 | 9.72E-03 |
| 1418253_a_at | Hspa4l        | heat shock protein 4 like                                                         | 18415     | 6.70  | 8.36  | 3.94 | 8.26E-03 |
| 1429001_at   | Pir           | pirin                                                                             | 69656     | 4.95  | 6.75  | 3.94 | 3.76E-03 |
| 1422186_s_at | Cyb5r3        | cytochrome b5 reductase 3                                                         | 109754    | 9.92  | 11.60 | 3.94 | 2.32E-03 |
| 1456028_x_at | Marcks        | Myristoylated alanine rich protein kinase C substrate                             | 17118     | 9.94  | 11.65 | 3.93 | 1.58E-03 |
| 1433775_at   | C77080        | expressed sequence C77080                                                         | 97130     | 6.47  | 8.19  | 3.93 | 3.36E-03 |
| 1439978_at   | Srcap         | Snf2-related CREBBP activator protein                                             | 546001    | 6.33  | 7.98  | 3.92 | 9.71E-03 |
| 1438312_s_at | Ltbp3         | latent transforming growth factor beta binding protein 3                          | 16998     | 8.85  | 10.50 | 3.88 | 6.81E-03 |
| 1426708_at   | Antxr2        | anthrax toxin receptor 2                                                          | 71914     | 5.80  | 7.71  | 3.86 | 3.93E-03 |
| 1426427_at   | Till1         | tubulin tyrosine ligase-like 1                                                    | 319953    | 4.81  | 6.68  | 3.86 | 8.74E-04 |
| 1430547_s_at | Cryz1l        | crystallin, zeta (quinone reductase)-like 1                                       | 66609     | 6.26  | 7.95  | 3.82 | 3.98E-03 |
| 1424018_at   | Hint1         | histidine triad nucleotide binding protein 1                                      | 15254     | 7.87  | 9.42  | 3.79 | 7.72E-03 |
| 1418901_at   | Cebpb         | CCAAT/enhancer binding protein (C/EBP), beta                                      | 12608     | 7.17  | 9.08  | 3.77 | 3.84E-03 |
| 1422854_at   | Shc1          | src homology 2 domain-containing transforming protein C1                          | 20416     | 8.12  | 9.92  | 3.76 | 7.27E-03 |
| 1425267_a_at | Pear1         | platelet endothelial aggregation receptor 1 ectonucleotide                        | 73182     | 8.04  | 10.15 | 3.72 | 3.15E-04 |
| 1427302_at   | Enpp3         | pyrophosphatase/phosphodiesterase 3                                               | 209558    | 7.84  | 9.83  | 3.66 | 6.54E-03 |
| 1452759_s_at | Ppfibp1       | PTPRF interacting protein, binding protein 1 (liprin beta 1)                      | 67533     | 9.89  | 11.50 | 3.66 | 2.47E-03 |
| 1446452_at   | ---           | ---                                                                               | ---       | 3.59  | 5.48  | 3.65 | 4.06E-03 |
| 1443299_at   | Pdlim3        | PDZ and LIM domain 3                                                              | 53318     | 3.36  | 5.22  | 3.58 | 1.37E-03 |
| 1418371_at   | Dynll2        | dynein light chain LC8-type 2                                                     | 68097     | 5.36  | 7.08  | 3.56 | 2.23E-03 |
| 1460387_a_at | Siae          | sialic acid acetyltransferase                                                     | 22619     | 4.22  | 5.90  | 3.56 | 3.97E-03 |
| 1459909_at   | Nfix          | nuclear factor I/X                                                                | 18032     | 6.44  | 8.16  | 3.55 | 1.12E-03 |
| 1440989_at   | Mrpl35        | mitochondrial ribosomal protein L35                                               | 66223     | 4.12  | 5.84  | 3.55 | 3.90E-03 |
| 1428851_at   | 1300014I06Rik | RIKEN cDNA 1300014I06 gene                                                        | 66895     | 8.78  | 10.41 | 3.54 | 2.85E-03 |
| 1451629_at   | Lbh           | limb-bud and heart                                                                | 77889     | 7.67  | 9.37  | 3.54 | 4.96E-04 |
| 1450424_a_at | Il18bp        | interleukin 18 binding protein                                                    | 16068     | 4.81  | 6.57  | 3.51 | 5.78E-03 |
| 1459450_at   | ---           | ---                                                                               | ---       | 4.44  | 6.73  | 3.50 | 9.74E-03 |
| 1434273_at   | Fam174b       | family with sequence similarity 174, member B                                     | 100038347 | 8.62  | 10.26 | 3.48 | 2.13E-03 |
| 1450698_at   | Dusp2         | dual specificity phosphatase 2                                                    | 13537     | 4.37  | 6.52  | 3.44 | 3.74E-03 |
| 1434104_at   | Slc35e1       | solute carrier family 35, member E1                                               | 270066    | 6.92  | 8.50  | 3.42 | 7.12E-03 |
| 1423824_at   | Gpr177        | G protein-coupled receptor 177                                                    | 68151     | 4.51  | 6.28  | 3.42 | 9.49E-03 |
| 1426246_at   | Pros1         | protein S (alpha)                                                                 | 19128     | 9.95  | 11.73 | 3.40 | 4.93E-03 |
| 1446586_at   | 8030463A06Rik | RIKEN cDNA 8030463A06 gene                                                        | 414083    | 2.91  | 5.03  | 3.36 | 5.36E-03 |
| 1450036_at   | Sgk3          | serum/glucocorticoid regulated kinase 3                                           | 170755    | 7.43  | 9.12  | 3.35 | 3.69E-03 |
| 1417810_a_at | Pacsin2       | protein kinase C and casein kinase substrate in neurons 2                         | 23970     | 9.87  | 11.51 | 3.34 | 2.95E-03 |
| 1427742_a_at | Klf6          | Kruppel-like factor 6                                                             | 23849     | 6.78  | 8.34  | 3.34 | 8.14E-03 |
| 1454824_s_at | Mtus1         | mitochondrial tumor suppressor 1                                                  | 102103    | 9.82  | 11.33 | 3.32 | 4.60E-03 |
| 1422502_at   | Parp1         | poly (ADP-ribose) polymerase family, member 1                                     | 11545     | 4.20  | 6.01  | 3.29 | 2.63E-03 |
| 1416982_at   | Foxo1         | forkhead box O1                                                                   | 56458     | 6.81  | 8.38  | 3.27 | 6.67E-03 |
| 1455257_at   | Itgb3         | integrin beta 3                                                                   | 16416     | 8.92  | 10.44 | 3.25 | 1.96E-03 |
| 1435282_at   | Gm967         | gene model 967, (NCBI)                                                            | 381217    | 5.16  | 6.97  | 3.20 | 1.93E-03 |
| 1448641_at   | Mbtd1         | mbt domain containing 1                                                           | 103537    | 4.92  | 6.38  | 3.15 | 3.15E-03 |
| 1455180_at   | Gcom1         | GRINL1A complex locus                                                             | 102371    | 6.62  | 8.17  | 3.14 | 2.84E-03 |
| 1453267_at   | Zfx3          | zinc finger homeobox 3                                                            | 11906     | 8.90  | 10.20 | 3.13 | 2.38E-03 |
| 1423575_a_at | Wbscr22       | Williams Beuren syndrome chromosome region 22                                     | 66138     | 5.91  | 7.24  | 3.04 | 5.37E-03 |
| 1451876_a_at | Trp63         | transformation related protein 63                                                 | 22061     | 3.75  | 5.06  | 3.03 | 7.93E-03 |
| 1433491_at   | Epb4.1l2      | erythrocyte protein band 4.1-like 2                                               | 13822     | 9.07  | 10.83 | 3.03 | 4.73E-03 |
| 1439266_a_at | Poir3k        | polymerase (RNA) III (DNA directed) polypeptide K                                 | 67005     | 6.67  | 8.04  | 3.00 | 8.94E-03 |
| 1420854_at   | Eln           | elastin                                                                           | 13717     | 7.07  | 8.59  | 3.00 | 6.77E-05 |

|              |                      |                                                                                               |        |       |       |          |          |
|--------------|----------------------|-----------------------------------------------------------------------------------------------|--------|-------|-------|----------|----------|
| 1419573_a_at | Lgals1               | lectin, galactose binding, soluble 1                                                          | 16852  | 6.89  | 8.19  | 3.00     | 3.63E-03 |
| 1454780_at   | Gaint14              | UDP-N-acetyl-alpha-D-galactosamine:polypeptide N-acetylgalactosaminyltransferase-like 4       | 233733 | 7.71  | 9.06  | 2.97     | 1.08E-03 |
| 1456087_at   | Nfia                 | nuclear factor I/A                                                                            | 18027  | 7.09  | 8.39  | 2.97     | 4.27E-03 |
| 1434657_at   | Gls                  | glutaminase                                                                                   | 98298  | 7.80  | 9.42  | 2.96     | 2.14E-03 |
| 1424562_a_at | Slc25a4              | solute carrier family 25 (mitochondrial carrier, adenine nucleotide translocator), member 4   | 11739  | 9.09  | 10.37 | 2.94     | 3.43E-03 |
| 1416224_at   | Zbtb17               | zinc finger and BTB domain containing 17                                                      | 22642  | 4.77  | 6.19  | 2.89     | 7.40E-03 |
| 1424027_at   | Pxn                  | paxillin                                                                                      | 19303  | 8.00  | 9.64  | 2.87     | 5.88E-03 |
| 1431375_s_at | Parva                | parvin, alpha                                                                                 | 57342  | 7.88  | 9.42  | 2.86     | 1.44E-03 |
| 1417423_at   | Grina                | glutamate receptor, ionotropic, N-methyl D-aspartate-associated protein 1 (glutamate binding) | 66168  | 7.38  | 9.29  | 2.82     | 8.77E-03 |
| 1454312_at   | 676575               | predicted gene, 676575                                                                        | 677325 | 5.26  | 6.98  | 2.81     | 8.76E-04 |
| 1439298_at   | ---                  | ---                                                                                           | ---    | 5.37  | 6.71  | 2.81     | 6.31E-04 |
| 1424529_s_at | Cgref1               | cell growth regulator with EF hand domain 1                                                   | 68567  | 5.72  | 7.12  | 2.80     | 4.87E-03 |
| 1423592_at   | Rock2                | Rho-associated coiled-coil containing protein kinase 2                                        | 19878  | 7.19  | 8.50  | 2.79     | 2.69E-03 |
| 1453556_x_at | Cd99                 | CD99 antigen                                                                                  | 673094 | 6.16  | 7.44  | 2.76     | 1.07E-03 |
| 1455564_at   | Bcr                  | breakpoint cluster region                                                                     | 110279 | 9.27  | 10.80 | 2.76     | 5.58E-03 |
| 1448259_at   | Fstl1                | folliculin-like 1                                                                             | 14314  | 10.34 | 11.96 | 2.75     | 6.33E-04 |
| 1419445_s_at | Sap18                | Sin3-associated polypeptide 18                                                                | 20220  | 7.11  | 8.40  | 2.75     | 2.46E-03 |
| 1416600_a_at | Rcan1                | regulator of calcineurin 1                                                                    | 54720  | 9.02  | 10.14 | 2.74     | 3.45E-03 |
| 1448388_a_at | 1110002B05Rik        | RIKEN cDNA 1110002B05 gene                                                                    | 104725 | 9.59  | 10.96 | 2.74     | 9.21E-04 |
| 1449089_at   | Nrip1                | nuclear receptor interacting protein 1                                                        | 268903 | 6.85  | 8.45  | 2.74     | 2.63E-03 |
| 1416343_a_at | Lamp2                | lysosomal-associated membrane protein 2                                                       | 16784  | 8.21  | 9.45  | 2.72     | 7.20E-03 |
| 1416526_a_at | Park7                | Parkinson disease (autosomal recessive, early onset) 7                                        | 57320  | 8.15  | 9.39  | 2.69     | 5.87E-03 |
| 1426499_at   | Sh3glb2              | SH3-domain GRB2-like endophilin B2                                                            | 227700 | 5.84  | 7.17  | 2.67     | 7.13E-03 |
| 1427929_a_at | Pdxk                 | pyridoxal (pyridoxine, vitamin B6) kinase                                                     | 216134 | 6.77  | 8.19  | 2.67     | 8.31E-03 |
| 1450924_at   | Hdgfrp3              | hepatoma-derived growth factor, related protein 3                                             | 29877  | 6.05  | 7.61  | 2.67     | 5.05E-03 |
| 1452594_at   | Dusp11               | dual specificity phosphatase 11 (RNA/RNP complex 1-interacting)                               | 72102  | 7.48  | 8.86  | 2.65     | 9.53E-03 |
| 1433832_at   | Unc84b               | unc-84 homolog B (C. elegans)                                                                 | 223697 | 10.66 | 11.96 | 2.63     | 6.95E-04 |
| 1451177_at   | Dnajb4               | DnaJ (Hsp40) homolog, subfamily B, member 4                                                   | 67035  | 8.58  | 9.87  | 2.62     | 4.30E-04 |
| 1444036_at   | ---                  | ---                                                                                           | ---    | 4.14  | 5.72  | 2.61     | 1.23E-03 |
| 1436502_at   | Mtus1                | mitochondrial tumor suppressor 1                                                              | 102103 | 7.57  | 8.92  | 2.61     | 1.15E-03 |
| 1436364_x_at | Nfix                 | nuclear factor I/X                                                                            | 18032  | 7.52  | 8.73  | 2.60     | 6.25E-03 |
| 1417298_at   | Ebpl                 | emopamil binding protein-like                                                                 | 68177  | 5.47  | 6.79  | 2.59     | 7.25E-04 |
| 1416978_at   | Fcgrt                | Fc receptor, IgG, alpha chain transporter                                                     | 14132  | 8.94  | 10.21 | 2.55     | 1.18E-03 |
| 1421268_at   | Ugcg                 | UDP-glucose ceramide glucosyltransferase                                                      | 22234  | 6.57  | 7.87  | 2.52     | 6.58E-03 |
| 1425517_s_at | Ogt                  | O-linked N-acetylglucosamine (GlcNAc) transferase                                             | 108155 | 7.72  | 8.88  | 2.52     | 9.90E-03 |
| 1416243_a_at | Rpl35                | ribosomal protein L35                                                                         | 66489  | 10.79 | 11.92 | 2.49     | 2.01E-03 |
| 1437003_at   | ---                  | ---                                                                                           | ---    | 7.51  | 8.75  | 2.46     | 8.67E-03 |
| 1424149_at   | Nsmce2               | non-SMC element 2 homolog (MMS21, S. cerevisiae)                                              | 68501  | 6.48  | 7.62  | 2.42     | 2.68E-03 |
| 1446953_at   | ---                  | ---                                                                                           | ---    | 4.78  | 6.35  | 2.41     | 7.15E-03 |
| 1425903_at   | Sema6a               | sema domain, transmembrane domain (TM), and cytoplasmic domain, (semaphorin) 6A               | 20358  | 8.74  | 10.14 | 2.38     | 2.32E-03 |
| 1454161_s_at | 0610007P14Rik        | RIKEN cDNA 0610007P14 gene                                                                    | 58520  | 5.05  | 6.20  | 2.37     | 4.23E-03 |
| 1423911_at   | Ppp2r5a              | protein phosphatase 2, regulatory subunit B (B56), alpha isoform                              | 9.01   | 10.56 | 2.36  | 6.68E-03 |          |
| 1417625_s_at | Cxcr7                | chemokine (C-X-C motif) receptor 7                                                            | 12778  | 11.63 | 13.08 | 2.35     | 4.29E-03 |
| 1428648_at   | Cand1                | cullin associated and neddylation disassociated 1                                             | 71902  | 6.60  | 7.60  | 2.30     | 6.41E-03 |
| 1424456_at   | Pvrl2                | poliovirus receptor-related 2                                                                 | 19294  | 9.42  | 10.42 | 2.26     | 3.49E-03 |
| 1420142_s_at | Pa2g4                | proliferation-associated 2G4                                                                  | 18813  | 10.47 | 11.48 | 2.24     | 5.04E-04 |
| 1423218_a_at | Mrpl49               | mitochondrial ribosomal protein L49                                                           | 18120  | 5.97  | 7.05  | 2.24     | 5.76E-03 |
| 1448286_at   | Hsd17b10             | hydroxysteroid (17-beta) dehydrogenase 10                                                     | 15108  | 6.10  | 7.07  | 2.24     | 9.30E-03 |
| 1450054_at   | Add1                 | adducin 1 (alpha)                                                                             | 11518  | 9.67  | 10.85 | 2.23     | 2.97E-04 |
| 1415800_at   | Gja1                 | gap junction protein, alpha 1                                                                 | 14609  | 11.23 | 12.49 | 2.22     | 1.19E-04 |
| 1435753_a_at | Nucks1               | nuclear casein kinase and cyclin-dependent kinase substrate 1                                 | 98415  | 8.71  | 9.67  | 2.16     | 6.65E-03 |
| 1430129_a_at | Commd8               | COMM domain containing 8                                                                      | 27784  | 7.03  | 8.04  | 2.16     | 6.99E-03 |
| 1418429_at   | Kif5b                | kinesin family member 5B                                                                      | 16573  | 5.65  | 6.74  | 2.15     | 4.50E-03 |
| 1420476_a_at | 100043064 /// Nap111 | predicted gene, 100043064 /// nucleosome assembly protein 1-like 1                            | 9.32   | 10.34 | 2.15  | 2.70E-03 |          |
| 1418892_at   | Rhoj                 | ras homolog gene family, member J                                                             | 80837  | 10.40 | 11.75 | 2.11     | 7.17E-03 |
| 1415822_at   | Scd2                 | stearoyl-Coenzyme A desaturase 2                                                              | 20250  | 8.37  | 9.43  | 2.06     | 8.12E-03 |
| 1419089_at   | Timp3                | tissue inhibitor of metalloproteinase 3                                                       | 21859  | 11.50 | 12.69 | 2.04     | 1.15E-03 |
| 1449256_a_at | Rab11a               | RAB11a, member RAS oncogene family                                                            | 53869  | 9.77  | 11.08 | 2.03     | 7.65E-03 |
| 1452571_at   | Tuba-rs1             | tubulin alpha, related sequence 1                                                             | 26947  | 7.44  | 8.47  | 2.02     | 3.91E-03 |
| 1419088_at   | Timp3                | tissue inhibitor of metalloproteinase 3                                                       | 21859  | 10.68 | 11.65 | 2.01     | 4.24E-03 |
| 1427240_at   | Dock6                | dedicator of cytokinesis 6                                                                    | 319899 | 7.99  | 9.04  | 2.00     | 7.02E-03 |

**Online Table II.** Gene microarray analysis of ex vivo isolated mouse intestinal blood vascular endothelial cells vs. lymphatic endothelial cells revealed genes that are specifically expressed by blood vessel endothelium. Complete list of significantly differentially expressed genes ( $\log_2$  ratio  $\geq 2$ , p-value  $\leq 0.01$ ,  $\log_2$  signal  $\geq 5$  in BEC group).

| Probe ID     | Gene Symbol     | Gene Title                                                                                              | Entrez Gene ID | median log <sub>2</sub> signal contBEC | median log <sub>2</sub> signal contLEC | fold change contBEC vs. contLEC | p-value  |
|--------------|-----------------|---------------------------------------------------------------------------------------------------------|----------------|----------------------------------------|----------------------------------------|---------------------------------|----------|
| 1438651_a_at | Aplnr           | apelin receptor                                                                                         | 23796          | 12.41                                  | 0.83                                   | 3385.36                         | 6.78E-08 |
| 1426906_at   | Ifi203          | interferon activated gene 203                                                                           | 15950          | 10.11                                  | -0.87                                  | 1427.83                         | 7.59E-06 |
| 1448710_at   | Cxcr4           | chemokine (C-X-C motif) receptor 4                                                                      | 12767          | 10.88                                  | 1.48                                   | 1375.91                         | 3.37E-04 |
| 1418084_at   | Nrp1            | neuropilin 1                                                                                            | 18186          | 11.66                                  | 1.62                                   | 1265.75                         | 8.64E-04 |
| 1435361_at   | Sema3g          | sema domain, immunoglobulin domain (Ig), short basic domain, secreted, (semaphorin) 3G                  | 218877         | 10.96                                  | 1.38                                   | 972.84                          | 2.83E-04 |
| 1450939_at   | Entpd1          | ectonucleoside triphosphate diphosphohydrolase 1                                                        | 12495          | 11.75                                  | 1.32                                   | 716.30                          | 1.17E-04 |
| 1439766_x_at | Vegfc           | vascular endothelial growth factor C                                                                    | 22341          | 9.84                                   | -0.95                                  | 660.36                          | 8.42E-04 |
| 1440926_at   | Flt1            | FMS-like tyrosine kinase 1                                                                              | 14254          | 11.69                                  | 3.68                                   | 622.26                          | 4.63E-04 |
| 1415885_at   | Chgb            | chromogranin B                                                                                          | 12653          | 11.71                                  | 1.77                                   | 583.26                          | 8.93E-03 |
| 1419300_at   | Flt1            | FMS-like tyrosine kinase 1                                                                              | 14254          | 9.85                                   | 1.11                                   | 491.58                          | 6.18E-07 |
| 1418849_x_at | Aqp7            | aquaporin 7                                                                                             | 11832          | 11.38                                  | 3.18                                   | 458.90                          | 1.04E-03 |
| 1449408_at   | Jam2            | junction adhesion molecule 2                                                                            | 67374          | 10.59                                  | 1.31                                   | 423.43                          | 1.91E-04 |
| 1455660_at   | Csf2rb          | colony stimulating factor 2 receptor, beta, low-affinity (granulocyte-macrophage)                       | 12983          | 8.15                                   | 0.06                                   | 352.04                          | 1.03E-05 |
| 1449048_s_at | Rab4a           | RAB4A, member RAS oncogene family                                                                       | 19341          | 8.58                                   | 0.50                                   | 331.25                          | 7.22E-05 |
| 1421326_at   | Csf2rb          | colony stimulating factor 2 receptor, beta, low-affinity (granulocyte-macrophage)                       | 12983          | 8.13                                   | 0.18                                   | 285.97                          | 7.30E-06 |
| 1431416_a_at | Jam2            | junction adhesion molecule 2                                                                            | 67374          | 8.97                                   | 1.03                                   | 277.93                          | 4.51E-05 |
| 1456793_at   | Cyt11           | cytokine like 1                                                                                         | 231162         | 8.87                                   | 0.85                                   | 255.63                          | 6.67E-06 |
| 1423037_at   | Aplnr           | apelin receptor                                                                                         | 23796          | 10.87                                  | 3.96                                   | 249.90                          | 2.73E-04 |
| 1448949_at   | Car4            | carbonic anhydrase 4                                                                                    | 12351          | 12.81                                  | 6.81                                   | 246.76                          | 6.54E-03 |
| 1449280_at   | Esm1            | endothelial cell-specific molecule 1                                                                    | 71690          | 9.71                                   | 2.61                                   | 246.64                          | 4.69E-04 |
| 1428867_at   | Exoc3l2         | exocyst complex component 3-like 2                                                                      | 74463          | 11.29                                  | 4.15                                   | 236.93                          | 8.28E-04 |
| 1448944_at   | Nrp1            | neuropilin 1                                                                                            | 18186          | 11.98                                  | 5.59                                   | 232.62                          | 3.97E-03 |
| 1421425_a_at | Rcan2           | regulator of calcineurin 2                                                                              | 53901          | 7.88                                   | 0.08                                   | 224.24                          | 3.11E-06 |
| 1453586_at   | Entpd1          | ectonucleoside triphosphate diphosphohydrolase 1                                                        | 12495          | 9.24                                   | 2.19                                   | 222.46                          | 7.71E-05 |
| 1457254_x_at | 6330442E10Rik   | RIKEN cDNA 6330442E10 gene                                                                              | 268567         | 9.02                                   | 1.18                                   | 212.36                          | 4.31E-05 |
| 1452231_x_at | Ifi203          | interferon activated gene 203                                                                           | 15950          | 9.92                                   | 3.18                                   | 205.10                          | 2.59E-04 |
| 1435386_at   | Vwf             | Von Willebrand factor homolog                                                                           | 22371          | 10.87                                  | 3.83                                   | 202.23                          | 8.62E-04 |
| 1447643_x_at | Snai2           | snail homolog 2 (Drosophila)                                                                            | 20583          | 10.50                                  | 3.33                                   | 195.92                          | 4.14E-04 |
| 1438511_a_at | 1190002H23Rik   | RIKEN cDNA 1190002H23 gene                                                                              | 66214          | 10.47                                  | 2.16                                   | 191.14                          | 4.22E-04 |
| 1434372_at   | AW112010        | expressed sequence AW112010                                                                             | 107350         | 9.52                                   | 2.92                                   | 180.64                          | 4.70E-04 |
| 1418944_at   | Cysl1r1         | cysteinyl leukotriene receptor 1                                                                        | 58861          | 8.83                                   | 1.07                                   | 178.95                          | 4.98E-03 |
| 1450884_at   | Cd36            | CD36 antigen                                                                                            | 12491          | 10.32                                  | 3.54                                   | 178.45                          | 1.37E-04 |
| 1418922_at   | Cadm3           | cell adhesion molecule 3                                                                                | 94332          | 8.13                                   | 1.27                                   | 178.34                          | 7.41E-05 |
| 1423614_at   | Lrrc8c          | leucine rich repeat containing 8 family, member C                                                       | 100604         | 10.69                                  | 2.23                                   | 177.38                          | 2.29E-03 |
| 1450639_at   | Slc28a2         | solute carrier family 28 (sodium-coupled nucleoside transporter), member 2                              | 269346         | 8.26                                   | 1.01                                   | 173.00                          | 5.52E-04 |
| 1426047_a_at | Ptprr           | protein tyrosine phosphatase, receptor type, R                                                          | 19279          | 9.92                                   | 2.05                                   | 171.08                          | 5.54E-04 |
| 1438081_at   | Mcc             | mutated in colorectal cancers                                                                           | 328949         | 9.75                                   | 1.41                                   | 162.21                          | 2.69E-03 |
| 1424408_at   | Lims2           | LIM and senescent cell antigen like domains 2                                                           | 225341         | 9.93                                   | 2.61                                   | 159.94                          | 2.48E-04 |
| 1425214_at   | P2ry6           | pyrimidinergic receptor P2Y, G-protein coupled, 6                                                       | 233571         | 7.90                                   | 1.61                                   | 140.15                          | 6.61E-04 |
| 1422866_at   | Col13a1         | collagen, type XIII, alpha 1                                                                            | 12817          | 9.09                                   | 2.14                                   | 135.80                          | 7.21E-04 |
| 1435123_at   | Efr3b           | EFR3 homolog B (S. cerevisiae)                                                                          | 668212         | 8.50                                   | 1.97                                   | 124.88                          | 3.79E-05 |
| 1455377_at   | Tll17           | tubulin tyrosine ligase-like family, member 7                                                           | 70892          | 7.19                                   | 0.29                                   | 124.78                          | 9.60E-04 |
| 1456521_at   | ---             | ---                                                                                                     | ---            | 7.86                                   | 1.91                                   | 122.62                          | 3.26E-03 |
| 1438068_at   | ---             | ---                                                                                                     | ---            | 6.51                                   | -0.76                                  | 122.02                          | 1.26E-03 |
| 1416114_at   | Sparcl1         | SPARC-like 1 (mast9, hevjin)                                                                            | 13602          | 10.33                                  | 2.64                                   | 121.47                          | 5.89E-04 |
| 1448961_at   | Plscr2          | phospholipid scramblase 2                                                                               | 18828          | 9.89                                   | 2.15                                   | 120.72                          | 1.81E-04 |
| 1454037_a_at | Flt1            | FMS-like tyrosine kinase 1                                                                              | 14254          | 11.45                                  | 4.98                                   | 118.72                          | 2.23E-04 |
| 1421571_a_at | Ly6c1 /// Ly6c2 | Lymphocyte antigen 6C                                                                                   | 17067          | 12.59                                  | 5.76                                   | 117.58                          | 1.05E-05 |
| 1425809_at   | Fabp4           | fatty acid binding protein 4, adipocyte                                                                 | 11770          | 9.78                                   | 3.73                                   | 115.41                          | 3.43E-03 |
| 1448507_at   | Efh1            | EF hand domain containing 1                                                                             | 98363          | 8.31                                   | 3.51                                   | 110.54                          | 9.23E-03 |
| 1428357_at   | 2610019F03Rik   | RIKEN cDNA 2610019F03 gene                                                                              | 72148          | 11.04                                  | 5.12                                   | 110.54                          | 1.93E-03 |
| 1429177_x_at | Sox17           | SRY-box containing gene 17                                                                              | 20671          | 10.20                                  | 3.90                                   | 109.47                          | 2.32E-04 |
| 1424737_at   | Thrsp           | thyroid hormone responsive SPOT14 homolog (Rattus)                                                      | 21835          | 11.06                                  | 3.72                                   | 105.42                          | 8.34E-05 |
| 1417963_at   | Pltp            | phospholipid transfer protein                                                                           | 18830          | 11.06                                  | 5.54                                   | 99.32                           | 8.35E-04 |
| 1457434_s_at | Ptpla           | protein tyrosine phosphatase-like (proline instead of catalytic arginine), member a                     | 30963          | 6.83                                   | 0.99                                   | 97.81                           | 2.28E-03 |
| 1447788_s_at | Tspyl3          | TSPY-like 3                                                                                             | 241732         | 7.41                                   | 1.95                                   | 97.59                           | 9.29E-03 |
| 1453070_at   | Pcdh17          | protocadherin 17                                                                                        | 219228         | 8.66                                   | 3.43                                   | 96.05                           | 2.20E-03 |
| 1435595_at   | 1810011O10Rik   | RIKEN cDNA 1810011O10 gene                                                                              | 69068          | 9.90                                   | 2.39                                   | 94.15                           | 7.34E-04 |
| 1423166_at   | Cd36            | CD36 antigen                                                                                            | 12491          | 11.31                                  | 4.42                                   | 93.61                           | 6.52E-05 |
| 1460011_at   | Cyp26b1         | cytochrome P450, family 26, subfamily b, polypeptide 1                                                  | 232174         | 9.18                                   | 3.28                                   | 93.30                           | 1.09E-04 |
| 1451756_at   | Flt1            | FMS-like tyrosine kinase 1                                                                              | 14254          | 10.73                                  | 4.61                                   | 90.80                           | 2.87E-05 |
| 1442698_at   | ---             | ---                                                                                                     | ---            | 6.79                                   | 0.73                                   | 90.35                           | 1.07E-04 |
| 1436895_at   | Centd1          | centaurin, delta 1                                                                                      | 212285         | 8.56                                   | 2.86                                   | 89.91                           | 9.99E-03 |
| 1457198_at   | Nrp1            | neuropilin 1                                                                                            | 18186          | 8.08                                   | 1.80                                   | 88.49                           | 1.35E-04 |
| 1449011_at   | Slc12a7         | solute carrier family 12, member 7                                                                      | 20499          | 8.77                                   | 1.88                                   | 88.06                           | 5.29E-04 |
| 1417751_at   | Stk10           | serine/threonine kinase 10                                                                              | 20868          | 8.61                                   | 1.01                                   | 87.80                           | 9.08E-03 |
| 1448299_at   | Slc1a1          | solute carrier family 1 (neuronal/epithelial high affinity glutamate transporter, system Xag), member 1 | 20510          | 7.54                                   | 1.38                                   | 84.04                           | 1.01E-03 |
| 1449937_at   | Pp11r           | placental protein 11 related                                                                            | 19011          | 8.20                                   | 0.85                                   | 83.74                           | 2.18E-03 |
| 1436568_at   | Jam2            | junction adhesion molecule 2                                                                            | 67374          | 9.85                                   | 3.55                                   | 83.58                           | 1.04E-05 |
| 1439084_at   | Cxcl12          | chemokine (C-X-C motif) ligand 12                                                                       | 20315          | 10.33                                  | 3.75                                   | 83.02                           | 1.21E-04 |

|              |               |                                                                                     |           |       |       |       |          |
|--------------|---------------|-------------------------------------------------------------------------------------|-----------|-------|-------|-------|----------|
| 1419288_at   | Jam2          | junction adhesion molecule 2                                                        | 67374     | 8.89  | 3.25  | 82.02 | 1.41E-04 |
| 1442033_at   | C1qtnf9       | C1q and tumor necrosis factor related protein 9                                     | 239126    | 9.84  | 2.95  | 81.78 | 3.82E-04 |
| 1420941_at   | Rgs5          | regulator of G-protein signaling 5                                                  | 19737     | 8.07  | 2.20  | 81.07 | 1.90E-03 |
| 1425253_a_at | Madcam1       | mucosal vascular addressin cell adhesion molecule 1                                 | 17123     | 6.28  | 0.57  | 79.04 | 7.57E-05 |
| 1448943_at   | Nrp1          | neuropilin 1                                                                        | 18186     | 11.80 | 5.52  | 76.45 | 6.57E-04 |
| 1450414_at   | Pdgfb         | platelet derived growth factor, B polypeptide                                       | 18591     | 8.32  | 2.77  | 74.81 | 4.35E-03 |
| 1437661_at   | AU021092      | expressed sequence AU021092                                                         | 239691    | 7.22  | 1.27  | 74.55 | 7.95E-06 |
| 1417680_at   | Kcna5         | potassium voltage-gated channel, shaker-related subfamily, member 5                 | 16493     | 9.31  | 2.58  | 73.90 | 2.13E-04 |
| 1429765_at   | 1500005K14Rik | RIKEN cDNA 1500005K14 gene                                                          | 76566     | 8.39  | 2.27  | 69.22 | 1.28E-06 |
| 1449146_at   | Notch4        | Notch gene homolog 4 (Drosophila)                                                   | 18132     | 9.81  | 2.66  | 67.33 | 6.23E-03 |
| 1416080_at   | Adam15        | a disintegrin and metallopeptidase domain 15 (metargidin)                           | 11490     | 8.24  | 2.73  | 67.02 | 1.40E-04 |
| 1451174_at   | Lrrc33        | leucine rich repeat containing 33                                                   | 224109    | 7.89  | 2.80  | 66.28 | 3.87E-03 |
| 1418094_s_at | Car4          | carbonic anhydrase 4                                                                | 12351     | 11.20 | 5.19  | 65.05 | 5.19E-05 |
| 1454443_at   | 483341110Rik  | RIKEN cDNA 483341110 gene                                                           | 74583     | 8.86  | 3.90  | 64.21 | 1.92E-03 |
| 1434931_at   | Neo1          | neogenin                                                                            | 18007     | 7.85  | 2.59  | 64.05 | 2.91E-03 |
| 1452106_at   | Npnt          | nephronectin                                                                        | 114249    | 5.48  | -0.42 | 63.53 | 9.01E-03 |
| 1418003_at   | 1190002H23Rik | RIKEN cDNA 1190002H23 gene                                                          | 66214     | 9.55  | 2.80  | 62.25 | 1.68E-03 |
| 1438785_at   | Enpp6         | ectonucleotide pyrophosphatase/phosphodiesterase 6                                  | 320981    | 7.66  | 1.83  | 61.55 | 1.25E-04 |
| 1421009_at   | Rsad2         | radical S-adenosyl methionine domain containing 2                                   | 58185     | 8.93  | 2.35  | 61.36 | 5.07E-03 |
| 1431805_a_at | Rhpn2         | rhophilin, Rho GTPase binding protein 2                                             | 52428     | 6.20  | 0.01  | 61.12 | 7.54E-03 |
| 1423353_at   | Crispld1      | cysteine-rich secretory protein LCCL domain containing 1                            | 83691     | 6.94  | 0.87  | 59.95 | 1.23E-05 |
| 1434140_at   | Mcf2l         | mcf.2 transforming sequence-like                                                    | 17207     | 10.31 | 3.06  | 59.47 | 5.22E-03 |
| 1419757_at   | Pitpnm2       | phosphatidylinositol transfer protein, membrane-associated 2                        | 19679     | 8.15  | 1.27  | 59.03 | 9.56E-03 |
| 1438237_at   | Rex2          | reduced expression 2                                                                | 19715     | 5.12  | -0.43 | 58.74 | 2.40E-03 |
| 1417185_at   | Ly6a          | lymphocyte antigen 6 complex, locus A                                               | 110454    | 12.58 | 6.37  | 57.84 | 1.37E-05 |
| 1453782_at   | 3021401C12Rik | RIKEN cDNA 3021401C12 gene                                                          | 70678     | 6.76  | 1.68  | 55.33 | 3.16E-04 |
| 1435564_at   | C230078M08Rik | RIKEN cDNA C230078M08 gene                                                          | 319749    | 10.52 | 4.09  | 55.29 | 6.72E-04 |
| 1418652_at   | Cxcl9         | chemokine (C-X-C motif) ligand 9                                                    | 17329     | 7.65  | 1.79  | 55.29 | 2.93E-03 |
| 1450224_at   | Col4a3        | collagen, type IV, alpha 3                                                          | 12828     | 7.52  | 1.71  | 55.01 | 1.40E-03 |
| 1457386_at   | ---           | ---                                                                                 | ---       | 6.98  | 1.62  | 54.92 | 1.86E-03 |
| 1438411_at   | Gpr81         | G protein-coupled receptor 81                                                       | 243270    | 7.57  | 2.25  | 54.07 | 5.10E-03 |
| 1417534_at   | Itgb5         | integrin beta 5                                                                     | 16419     | 7.09  | 1.39  | 53.99 | 2.09E-03 |
| 1417333_at   | Rasa4         | RAS p21 protein activator 4                                                         | 54153     | 6.23  | 0.82  | 52.63 | 5.96E-04 |
| 1432601_at   | Mll5          | myeloid/lymphoid or mixed-lineage leukemia 5                                        | 69188     | 5.08  | 0.32  | 52.62 | 1.32E-03 |
| 1449906_at   | Selp          | selectin, platelet                                                                  | 20344     | 5.83  | 0.40  | 52.17 | 2.68E-06 |
| 1449360_at   | Csf2rb2       | colony stimulating factor 2 receptor, beta 2, low-affinity (granulocyte-macrophage) | 12984     | 7.39  | 1.48  | 52.07 | 5.51E-03 |
| 1435043_at   | Plcb1         | phospholipase C, beta 1                                                             | 18795     | 8.86  | 3.18  | 52.00 | 4.23E-03 |
| 1425008_a_at | Ifi203        | interferon activated gene 203                                                       | 15950     | 10.76 | 4.98  | 51.10 | 3.01E-03 |
| 1440156_s_at | ---           | ---                                                                                 | 99101     | 7.36  | 2.65  | 50.83 | 2.64E-03 |
| 1455034_at   | Nr4a2         | nuclear receptor subfamily 4, group A, member 2                                     | ---       | 6.74  | 2.14  | 50.59 | 1.20E-03 |
| 1421129_a_at | Atp2a3        | ATPase, Ca++ transporting, ubiquitous                                               | 53313     | 8.23  | 2.15  | 49.38 | 4.71E-03 |
| 1423503_at   | Jam3          | junction adhesion molecule 3                                                        | 83964     | 7.90  | 3.74  | 49.03 | 5.67E-03 |
| 1418334_at   | Dbf4          | DBF4 homolog (S. cerevisiae)                                                        | 27214     | 5.58  | 0.23  | 48.08 | 9.54E-05 |
| 1422217_a_at | Cyp1a1        | cytochrome P450, family 1, subfamily a, polypeptide 1                               | 13076     | 6.98  | 1.25  | 48.00 | 4.16E-03 |
| 1448024_at   | Npr3          | natriuretic peptide receptor 3                                                      | 18162     | 6.69  | 1.54  | 47.92 | 1.76E-03 |
| 1426858_at   | Inhbb         | inhibin beta-B                                                                      | 16324     | 8.67  | 2.69  | 47.22 | 4.76E-05 |
| 1450928_at   | LOC100045546  | similar to Id4                                                                      | 100045546 | 5.53  | 0.03  | 47.21 | 9.02E-03 |
| 1420914_at   | Slc02a1       | Solute carrier organic anion transporter family, member 2a1                         | 24059     | 8.39  | 3.92  | 46.76 | 6.68E-03 |
| 1458700_at   | ---           | ---                                                                                 | ---       | 6.96  | 1.89  | 45.30 | 1.59E-03 |
| 1420401_a_at | Ramp3         | receptor (calcitonin) activity modifying protein 3                                  | 56089     | 7.74  | 3.03  | 45.12 | 1.72E-03 |
| 1418289_at   | Nes           | nestin                                                                              | 18008     | 8.73  | 3.96  | 44.38 | 2.26E-04 |
| 1417567_at   | Ctnnbip1      | catenin beta interacting protein 1                                                  | 67087     | 5.89  | 1.15  | 44.11 | 2.86E-03 |
| 1455820_x_at | Scarb1        | scavenger receptor class B, member 1                                                | 20778     | 10.29 | 4.43  | 43.83 | 1.97E-05 |
| 1452474_a_at | Art3          | ADP-ribosyltransferase 3                                                            | 109979    | 5.95  | 1.84  | 43.44 | 6.29E-03 |
| 1451038_at   | Aplin         | apelin                                                                              | 30878     | 7.55  | 3.42  | 43.15 | 7.68E-03 |
| 1435749_at   | Gda           | guanine deaminase                                                                   | 14544     | 8.93  | 3.24  | 42.60 | 9.33E-03 |
| 1437378_x_at | Scarb1        | scavenger receptor class B, member 1                                                | 20778     | 10.12 | 4.09  | 41.62 | 3.51E-04 |
| 1438055_at   | Rarres1       | retinoic acid receptor responder (tazarotene induced) 1                             | 109222    | 5.00  | 0.51  | 41.21 | 4.34E-04 |
| 1429830_a_at | Cd59a         | CD59a antigen                                                                       | 12509     | 5.46  | 0.89  | 40.91 | 3.76E-03 |
| 1456633_at   | Trpm3         | transient receptor potential cation channel, subfamily M, member 3                  | 226025    | 5.66  | 0.61  | 40.80 | 3.23E-03 |
| 1417023_a_at | Fabp4         | fatty acid binding protein 4, adipocyte                                             | 11770     | 13.52 | 7.78  | 40.44 | 1.16E-05 |
| 1426152_a_at | Kitl          | kit ligand                                                                          | 17311     | 8.75  | 3.00  | 39.96 | 2.29E-04 |
| 1451567_a_at | Ifi203        | interferon activated gene 203                                                       | 15950     | 8.16  | 2.29  | 39.48 | 3.89E-04 |
| 1460733_at   | Unc119b       | unc-119 homolog B (C. elegans)                                                      | 106840    | 7.57  | 2.05  | 39.44 | 1.73E-04 |
| 1452348_s_at | Mnda          | myeloid cell nuclear differentiation antigen                                        | 381308    | 8.41  | 2.35  | 38.90 | 6.92E-04 |
| 1435132_at   | Disp1         | dispatched homolog 1 (Drosophila)                                                   | 68897     | 6.31  | 0.93  | 38.19 | 5.62E-03 |
| 1434510_at   | Papss2        | 3'-phosphoadenosine 5'-phosphosulfate synthase 2                                    | 23972     | 7.40  | 3.02  | 38.02 | 7.26E-03 |
| 1449434_at   | Car3          | carbonic anhydrase 3                                                                | 12350     | 9.71  | 4.44  | 37.65 | 5.81E-05 |
| 1419467_at   | Clec14a       | C-type lectin domain family 14, member a                                            | 66864     | 9.65  | 4.58  | 37.31 | 7.22E-05 |
| 1442187_at   | Bdkrb2        | Bradykinin receptor, beta 2                                                         | 12062     | 9.04  | 3.78  | 37.20 | 7.60E-04 |
| 1438730_at   | BC028801      | cDNA sequence BC028801                                                              | 408054    | 7.30  | 2.48  | 36.91 | 1.08E-03 |
| 1430391_a_at | St8sia4       | ST8 alpha-N-acetylneuraminidase alpha-2,8-sialyltransferase 4                       | 20452     | 10.81 | 5.03  | 36.81 | 3.70E-04 |
| 1428899_at   | Tmem182       | transmembrane protein 182                                                           | 381339    | 8.63  | 3.25  | 36.70 | 7.16E-06 |
| 1420942_s_at | Rgs5          | regulator of G-protein signaling 5                                                  | 19737     | 7.76  | 1.68  | 36.64 | 4.50E-03 |
| 1440355_at   | Kctd12b       | potassium channel tetramerisation domain containing 12b                             | 207474    | 8.71  | 3.81  | 36.24 | 1.76E-04 |
| 1456263_at   | Notch4        | Notch gene homolog 4 (Drosophila)                                                   | 18132     | 9.07  | 3.75  | 35.71 | 7.98E-06 |

|              |               |                                                                                                               |        |       |      |       |          |
|--------------|---------------|---------------------------------------------------------------------------------------------------------------|--------|-------|------|-------|----------|
| 1455587_at   | Fam167b       | family with sequence similarity 167, member B                                                                 | 230766 | 7.83  | 2.73 | 35.41 | 3.35E-03 |
| 1439275_s_at | 9530010C24Rik | RIKEN cDNA 9530010C24 gene                                                                                    | 109279 | 5.82  | 0.53 | 35.28 | 1.98E-03 |
| 1452294_at   | Pcdh1         | protocadherin 1                                                                                               | 75599  | 7.29  | 3.29 | 35.23 | 7.09E-03 |
| 1428794_at   | Specc1        | sperm antigen with calponin homology and coiled-coil domains 1                                                | 432572 | 7.96  | 2.64 | 35.23 | 3.89E-03 |
| 1427512_a_at | Lama3         | laminin, alpha 3                                                                                              | 16774  | 9.12  | 4.14 | 34.82 | 3.35E-04 |
| 1460465_at   | A930038C07Rik | RIKEN cDNA A930038C07 gene                                                                                    | 68169  | 5.24  | 0.50 | 34.72 | 5.84E-03 |
| 1442368_at   | Kctd12b       | potassium channel tetramerisation domain containing 12b                                                       | 207474 | 9.18  | 4.44 | 34.38 | 6.22E-05 |
| 1429896_at   | 5830408B19Rik | RIKEN cDNA 5830408B19 gene                                                                                    | 74756  | 7.16  | 1.00 | 33.69 | 2.36E-03 |
| 1425781_a_at | Plcb1         | phospholipase C, beta 1                                                                                       | 18795  | 10.53 | 4.22 | 33.65 | 5.57E-03 |
| 1451415_at   | 1810011O10Rik | RIKEN cDNA 1810011O10 gene                                                                                    | 69068  | 11.75 | 6.07 | 33.63 | 2.13E-03 |
| 1437689_x_at | Clu           | clusterin                                                                                                     | 12759  | 10.76 | 5.32 | 32.93 | 1.05E-03 |
| 1423352_at   | Crispld1      | cysteine-rich secretory protein LCCL domain containing 1                                                      | 83691  | 7.35  | 3.08 | 32.57 | 1.98E-03 |
| 1418872_at   | Abcb1b        | ATP-binding cassette, sub-family B (MDR/TAP), member 1B                                                       | 18669  | 5.76  | 0.99 | 32.31 | 2.97E-03 |
| 1416050_a_at | Scarb1        | scavenger receptor class B, member 1                                                                          | 20778  | 10.04 | 4.83 | 32.23 | 1.01E-05 |
| 1460601_at   | Myrip         | myosin VIIA and Rab interacting protein                                                                       | 245049 | 10.05 | 4.40 | 31.46 | 2.88E-04 |
| 1434802_s_at | Ntf3          | neurotrophin 3                                                                                                | 18205  | 7.09  | 1.76 | 31.11 | 3.07E-03 |
| 1454849_x_at | Clu           | clusterin                                                                                                     | 12759  | 11.48 | 6.09 | 31.10 | 1.27E-03 |
| 1460476_s_at | 1200015N20Rik | RIKEN cDNA 1200015N20 gene                                                                                    | 71721  | 7.45  | 2.40 | 31.04 | 6.39E-03 |
| 1422544_at   | Myo10         | myosin X                                                                                                      | 17909  | 11.18 | 6.80 | 30.98 | 2.36E-04 |
| 1426430_at   | Jag2          | jagged 2                                                                                                      | 16450  | 7.75  | 3.21 | 30.88 | 5.64E-05 |
| 1443771_x_at | Smad7         | MAD homolog 7 (Drosophila)                                                                                    | 17131  | 7.37  | 2.45 | 30.86 | 8.97E-03 |
| 1453282_at   | Cxadr         | coxsackievirus and adenovirus receptor                                                                        | 13052  | 6.28  | 0.70 | 29.67 | 8.56E-03 |
| 1417426_at   | Srgn          | serglycin                                                                                                     | 19073  | 11.41 | 6.25 | 29.45 | 1.42E-04 |
| 1437668_at   | Ccr1          | Chemokine (C-C motif) receptor-like 1                                                                         | 252837 | 10.50 | 5.62 | 29.43 | 2.08E-07 |
| 1456337_at   | Centd1        | centaurin, delta 1                                                                                            | 212285 | 6.85  | 2.97 | 29.38 | 5.34E-03 |
| 1446855_at   | Vps13d        | vacuolar protein sorting 13 D (yeast)                                                                         | 230895 | 5.21  | 0.79 | 29.37 | 8.95E-03 |
| 1417251_at   | Palmd         | palmdelphin                                                                                                   | 114301 | 9.85  | 5.05 | 29.02 | 1.88E-03 |
| 1417155_at   | Mycn          | v-myc myelocytomatosis viral related oncogene, neuroblastoma derived (avian)                                  | 18109  | 5.79  | 1.26 | 28.92 | 1.84E-04 |
| 1441963_at   | RP23-100C5.8  | ProSAPIP1 protein                                                                                             | 241638 | 5.08  | 0.78 | 28.91 | 2.57E-03 |
| 1421118_a_at | Gpr56         | G protein-coupled receptor 56                                                                                 | 14766  | 9.32  | 4.32 | 28.54 | 4.81E-06 |
| 1420136_a_at | ---           | ---                                                                                                           | ---    | 5.12  | 1.14 | 28.54 | 4.35E-03 |
| 1424524_at   | 1200002N14Rik | RIKEN cDNA 1200002N14 gene                                                                                    | 71712  | 10.30 | 4.90 | 28.23 | 1.88E-03 |
| 1433485_x_at | Gpr56         | G protein-coupled receptor 56                                                                                 | 14766  | 10.37 | 4.94 | 28.12 | 5.00E-04 |
| 1429764_at   | 1500005K14Rik | RIKEN cDNA 1500005K14 gene                                                                                    | 76566  | 9.48  | 4.28 | 27.80 | 5.48E-04 |
| 1425600_a_at | Plcb1         | phospholipase C, beta 1                                                                                       | 18795  | 9.26  | 4.34 | 27.79 | 1.69E-05 |
| 1440173_x_at | Selp          | selectin, platelet                                                                                            | 20344  | 5.74  | 1.48 | 27.35 | 9.38E-03 |
| 1422192_at   | Gja5          | gap junction membrane channel protein alpha 5                                                                 | 14613  | 8.40  | 4.30 | 27.31 | 6.93E-03 |
| 1454861_at   | Txlna         | taxilin alpha                                                                                                 | 109658 | 7.25  | 2.09 | 26.74 | 4.17E-03 |
| 1419099_x_at | Stom          | stomatin                                                                                                      | 13830  | 8.72  | 3.99 | 26.63 | 3.31E-03 |
| 1417616_at   | St6galnac2    | ST6 (alpha-N-acetyl-neuraminyl-2,3-beta-galactosyl-1,3)-N-acetylgalactosaminide alpha-2,6-sialyltransferase 2 | 20446  | 8.01  | 3.30 | 26.60 | 3.35E-03 |
| 1437458_x_at | Clu           | clusterin                                                                                                     | 12759  | 11.46 | 6.18 | 26.49 | 6.34E-04 |
| 1455398_at   | Lrrc8c        | leucine rich repeat containing 8 family, member C                                                             | 100604 | 10.07 | 5.97 | 26.17 | 3.41E-03 |
| 1419417_at   | Vegfc         | vascular endothelial growth factor C                                                                          | 22341  | 7.41  | 2.45 | 26.07 | 2.29E-03 |
| 1451794_at   | Tmcc3         | transmembrane and coiled coil domains 3                                                                       | 319880 | 6.64  | 2.26 | 26.04 | 7.29E-04 |
| 1415854_at   | Kitl          | kit ligand                                                                                                    | 17311  | 9.11  | 3.86 | 26.01 | 4.99E-04 |
| 1419787_a_at | Zfp628        | zinc finger protein 628                                                                                       | 232816 | 5.72  | 0.85 | 25.90 | 5.74E-04 |
| 1429527_a_at | Plscr1        | phospholipid scramblase 1                                                                                     | 5359   | 8.65  | 4.30 | 25.65 | 6.30E-03 |
| 1448117_at   | Kitl          | kit ligand                                                                                                    | 17311  | 10.50 | 5.20 | 25.62 | 2.59E-03 |
| 1438648_x_at | 1190003M12Rik | RIKEN cDNA 1190003M12 gene                                                                                    | 68888  | 6.78  | 2.54 | 25.39 | 5.00E-03 |
| 1420558_at   | Selp          | selectin, platelet                                                                                            | 20344  | 7.27  | 3.27 | 25.31 | 3.33E-04 |
| 1419072_at   | Gstm7         | glutathione S-transferase, mu 7                                                                               | 68312  | 6.35  | 1.83 | 25.23 | 5.67E-03 |
| 1441907_s_at | Cd93          | CD93 antigen                                                                                                  | 17064  | 11.69 | 6.98 | 25.22 | 1.59E-06 |
| 1450212_at   | Fmnl1         | formin-like 1                                                                                                 | 57778  | 7.03  | 2.78 | 24.89 | 1.04E-03 |
| 1419468_at   | Clec14a       | C-type lectin domain family 14, member a                                                                      | 66864  | 9.89  | 5.72 | 24.88 | 3.30E-03 |
| 1454809_at   | Ncoa7         | nuclear receptor coactivator 7                                                                                | 211329 | 9.49  | 3.65 | 24.85 | 3.91E-03 |
| 1418626_a_at | Clu           | clusterin                                                                                                     | 12759  | 10.53 | 5.34 | 24.75 | 5.91E-04 |
| 1434755_at   | Coro2b        | coronin, actin binding protein, 2B                                                                            | 235431 | 7.65  | 3.18 | 24.63 | 2.94E-04 |
| 1418090_at   | Plvap         | plasmalemma vesicle associated protein                                                                        | 84094  | 12.03 | 7.46 | 24.51 | 5.86E-06 |
| 1418848_at   | Aqp7          | aquaporin 7                                                                                                   | 11832  | 8.12  | 3.69 | 24.42 | 1.42E-05 |
| 1421929_at   | Epha4         | Eph receptor A4                                                                                               | 13838  | 7.90  | 3.35 | 24.19 | 2.77E-03 |
| 1436920_at   | Pcdh17        | protocadherin 17                                                                                              | 219228 | 10.61 | 6.40 | 24.17 | 6.04E-03 |
| 1435857_s_at | Aplp1         | amyloid beta (A4) precursor-like protein 1                                                                    | 11803  | 6.62  | 1.22 | 24.10 | 6.05E-03 |
| 1450883_a_at | Cd36          | CD36 antigen                                                                                                  | 12491  | 12.84 | 7.59 | 23.08 | 7.78E-04 |
| 1446734_at   | C77438        | expressed sequence C77438                                                                                     | 97136  | 6.51  | 1.80 | 23.03 | 7.45E-03 |
| 1423180_at   | Kcnb1         | potassium voltage gated channel, Shab-related subfamily, member 1                                             | 16500  | 7.04  | 3.36 | 22.80 | 4.92E-03 |
| 1426399_at   | Vwa1          | von Willebrand factor A domain containing 1                                                                   | 246228 | 9.96  | 6.11 | 22.57 | 7.28E-03 |
| 1422479_at   | Acscs2        | acyl-CoA synthetase short-chain family member 2                                                               | 60525  | 6.34  | 1.65 | 22.48 | 2.82E-03 |
| 1454632_at   | 6330442E10Rik | RIKEN cDNA 6330442E10 gene                                                                                    | 268567 | 6.37  | 1.43 | 22.35 | 2.68E-03 |
| 1446619_at   | A130038J17Rik | RIKEN cDNA A130038J17 gene                                                                                    | 320628 | 5.95  | 2.10 | 22.26 | 7.48E-03 |
| 1437012_x_at | Rapgef3       | Rap guanine nucleotide exchange factor (GEF) 3                                                                | 223864 | 10.79 | 6.07 | 22.04 | 1.76E-03 |
| 1436058_at   | Rsad2         | radical S-adenosyl methionine domain containing 2                                                             | 58185  | 11.85 | 7.65 | 21.71 | 3.68E-05 |
| 1448755_at   | Col15a1       | collagen, type XV, alpha 1                                                                                    | 12819  | 11.72 | 6.48 | 21.68 | 7.29E-03 |
| 1424470_a_at | Rapgef3       | Rap guanine nucleotide exchange factor (GEF) 3                                                                | 223864 | 12.64 | 7.49 | 21.60 | 3.24E-03 |
| 1422040_at   | Sema7a        | sema domain, immunoglobulin domain (Ig), and GPI membrane anchor, (semaphorin) 7A                             | 20361  | 7.58  | 3.82 | 21.43 | 2.23E-03 |
| 1423326_at   | Entpd1        | ectonucleoside triphosphate diphosphohydrolase 1                                                              | 12495  | 8.01  | 3.91 | 21.40 | 1.46E-04 |
| 1450413_at   | Pdgfb         | platelet derived growth factor, B polypeptide                                                                 | 18591  | 9.70  | 5.70 | 21.38 | 2.21E-03 |
| 1427086_at   | ---           | ---                                                                                                           | 20564  | 8.05  | 4.73 | 21.35 | 9.14E-03 |
| 1434111_at   | Lphn2         | latrophilin 2                                                                                                 | 99633  | 9.66  | 5.38 | 21.12 | 6.71E-03 |
| 1454713_s_at | Hdc           | histidine decarboxylase                                                                                       | 15186  | 5.52  | 1.34 | 21.07 | 5.29E-04 |

|              |                   |                                                                                   |        |       |      |       |          |
|--------------|-------------------|-----------------------------------------------------------------------------------|--------|-------|------|-------|----------|
| 1439665_at   | Lpar4             | lysophosphatidic acid receptor 4                                                  | 78134  | 6.57  | 3.18 | 20.92 | 7.00E-03 |
| 1449751_at   | Slc6a6            | Solute carrier family 6 (neurotransmitter transporter, taurine), member 6         | 21366  | 7.35  | 3.89 | 20.88 | 4.62E-03 |
| 1439523_at   | D330027G24Rik     | RIKEN cDNA D330027G24 gene                                                        | 399584 | 5.97  | 2.00 | 20.81 | 4.72E-04 |
| 1421622_a_at | Rapgef4           | Rap guanine nucleotide exchange factor (GEF) 4                                    | 56508  | 7.29  | 3.30 | 20.80 | 5.33E-03 |
| 1454656_at   | Spata13           | spermatogenesis associated 13                                                     | 219140 | 8.37  | 3.70 | 20.62 | 2.38E-04 |
| 1440589_at   | ---               | ---                                                                               | ---    | 8.05  | 4.05 | 20.45 | 6.09E-04 |
| 1427020_at   | Scara3            | scavenger receptor class A, member 3                                              | 219151 | 5.80  | 0.63 | 20.22 | 6.57E-03 |
| 1437268_at   | Lancl3            | LanC lantibiotic synthetase component C-like 3 (bacterial)                        | 236285 | 5.18  | 1.43 | 20.18 | 1.78E-03 |
| 1439806_at   | ---               | ---                                                                               | ---    | 5.85  | 1.42 | 20.05 | 5.81E-03 |
| 1433743_at   | Dach1             | dachshund 1 (Drosophila)                                                          | 13134  | 6.79  | 2.81 | 19.94 | 6.83E-04 |
| 1422868_s_at | Gda               | guanine deaminase                                                                 | 14544  | 7.83  | 2.68 | 19.90 | 3.72E-03 |
| 1459840_s_at | Cdc28b            | coiled coil domain containing 28B                                                 | 66264  | 10.79 | 5.67 | 19.79 | 9.68E-04 |
| 1435184_at   | Npr3              | natriuretic peptide receptor 3                                                    | 18162  | 6.92  | 3.06 | 19.65 | 1.05E-04 |
| 1421657_a_at | Sox17             | SRY-box containing gene 17                                                        | 20671  | 5.76  | 1.56 | 19.63 | 6.61E-03 |
| 1453748_a_at | Kif23             | kinesin family member 23                                                          | 71819  | 5.80  | 1.68 | 19.63 | 7.92E-03 |
| 1430615_at   | Tll7              | tubulin tyrosine ligase-like family, member 7                                     | 70892  | 6.37  | 2.24 | 19.46 | 3.32E-03 |
| 1422699_at   | Alox12            | arachidonate 12-lipoxygenase                                                      | 11684  | 9.93  | 5.10 | 19.05 | 1.74E-03 |
| 1449592_at   | Tcf15             | transcription factor 15                                                           | 21407  | 9.65  | 5.47 | 18.92 | 5.53E-05 |
| 1458324_x_at | ---               | ---                                                                               | ---    | 7.63  | 3.92 | 18.87 | 3.46E-04 |
| 1428574_a_at | Chn2              | chimerin (chimaerin) 2                                                            | 69993  | 7.23  | 2.90 | 18.86 | 1.07E-03 |
| 1423585_at   | Igf1b7            | insulin-like growth factor binding protein 7                                      | 29817  | 9.79  | 5.94 | 18.76 | 3.43E-04 |
| 1424471_at   | Rapgef3           | Rap guanine nucleotide exchange factor (GEF) 3                                    | 223864 | 7.61  | 2.99 | 18.70 | 8.57E-03 |
| 1452937_s_at | Cdc28b            | coiled coil domain containing 28B                                                 | 66264  | 9.58  | 5.05 | 18.28 | 4.31E-04 |
| 1436090_at   | Enpp6             | ectonucleotide pyrophosphatase/phosphodiesterase 6                                | 320981 | 7.11  | 2.93 | 18.27 | 7.64E-04 |
| 1437401_at   | Igf1              | insulin-like growth factor 1                                                      | 16000  | 6.42  | 3.29 | 18.23 | 7.47E-03 |
| 1459913_at   | Tnfsf10           | tumor necrosis factor (ligand) superfamily, member 10                             | 22035  | 10.20 | 6.20 | 18.06 | 2.44E-05 |
| 1452296_at   | Slit3             | slit homolog 3 (Drosophila)                                                       | 20564  | 6.44  | 1.33 | 18.02 | 8.81E-03 |
| 1451972_at   | Glicc1            | glucocorticoid induced transcript 1                                               | 170772 | 5.13  | 1.52 | 17.83 | 8.14E-03 |
| 1416457_at   | Ddah2             | dimethylarginine dimethylaminohydrolase 2                                         | 51793  | 7.54  | 3.29 | 17.73 | 4.36E-03 |
| 1435554_at   | Tmcc3             | transmembrane and coiled coil domains 3                                           | 319880 | 11.38 | 7.09 | 17.56 | 3.94E-05 |
| 1435918_at   | BC055107          | cDNA sequence BC055107                                                            | 268709 | 6.87  | 2.57 | 17.52 | 2.21E-03 |
| 1417574_at   | Cxcl12            | chemokine (C-X-C motif) ligand 12                                                 | 20315  | 12.97 | 8.97 | 17.49 | 1.18E-03 |
| 1444242_at   | Slco2a1           | Solute carrier organic anion transporter family, member 2a1                       | 24059  | 10.66 | 6.43 | 17.38 | 1.49E-03 |
| 1444074_at   | Syne2             | synaptic nuclear envelope 2                                                       | 319565 | 5.75  | 1.53 | 17.32 | 6.03E-03 |
| 1424518_at   | Apol9a /// Apol9b | apolipoprotein L 9a /// apolipoprotein L 9b                                       | 223672 | 6.07  | 2.19 | 17.28 | 3.24E-03 |
| 1425827_at   | Nkx2-3            | NK2 transcription factor related, locus 3 (Drosophila)                            | 18089  | 6.47  | 2.41 | 17.24 | 3.49E-03 |
| 1419589_at   | Cd93              | CD93 antigen                                                                      | 17064  | 11.79 | 7.47 | 17.07 | 1.03E-04 |
| 1415855_at   | Kitl              | kit ligand                                                                        | 17311  | 8.76  | 4.42 | 16.99 | 1.17E-04 |
| 1419097_a_at | Stom              | stomatin                                                                          | 13830  | 7.90  | 4.48 | 16.79 | 1.69E-03 |
| 1427009_at   | Lama5             | laminin, alpha 5                                                                  | 16776  | 7.45  | 4.04 | 16.54 | 7.11E-03 |
| 1437462_x_at | Mmp15             | matrix metalloproteinase 15                                                       | 17388  | 11.97 | 7.14 | 16.51 | 8.80E-03 |
| 1453101_at   | Kihl25            | kelch-like 25 (Drosophila)                                                        | 207952 | 5.53  | 1.69 | 16.40 | 1.32E-03 |
| 1452952_at   | 9300418K01Rik     | RIKEN cDNA 9300418K01 gene                                                        | 71532  | 6.68  | 3.50 | 16.33 | 3.83E-03 |
| 1456603_at   | 1500005K14Rik     | RIKEN cDNA 1500005K14 gene                                                        | 76566  | 10.91 | 6.22 | 16.30 | 1.71E-03 |
| 1421008_at   | Rsad2             | radical S-adenosyl methionine domain containing 2                                 | 58185  | 8.20  | 4.26 | 16.21 | 5.72E-03 |
| 1447863_s_at | Nr4a2             | nuclear receptor subfamily 4, group A, member 2                                   | 18227  | 6.63  | 3.01 | 16.20 | 1.00E-03 |
| 1422973_a_at | Thrsp             | thyroid hormone responsive SPOT14 homolog (Rattus)                                | 21835  | 8.52  | 5.26 | 15.92 | 1.04E-03 |
| 1450251_a_at | Lnx1              | ligand of numb-protein X 1                                                        | 16924  | 6.41  | 2.73 | 15.74 | 2.81E-03 |
| 1428349_s_at | Ebf3              | early B-cell factor 3                                                             | 13593  | 9.62  | 6.10 | 15.71 | 2.29E-03 |
| 1422597_at   | Mmp15             | matrix metalloproteinase 15                                                       | 17388  | 5.04  | 1.82 | 15.64 | 1.54E-03 |
| 1459903_at   | Sema7a            | sema domain, immunoglobulin domain (Ig), and GPI membrane anchor, (semaphorin) 7A | 20361  | 10.74 | 6.90 | 15.60 | 6.03E-03 |
| 1443675_at   | ---               | ---                                                                               | ---    | 5.77  | 1.53 | 15.58 | 9.67E-03 |
| 1421170_a_at | Plcb1             | phospholipase C, beta 1                                                           | 18795  | 6.66  | 3.19 | 15.35 | 9.19E-04 |
| 1442075_at   | Al314604          | expressed sequence Al314604                                                       | 102027 | 7.44  | 3.25 | 15.30 | 2.63E-03 |
| 1435557_at   | Fhod1             | formin homology 2 domain containing 1                                             | 234686 | 7.42  | 3.96 | 15.26 | 9.78E-03 |
| 1446481_at   | ---               | ---                                                                               | ---    | 7.07  | 3.85 | 15.20 | 7.39E-04 |
| 1420913_at   | Slco2a1           | solute carrier organic anion transporter family, member 2a1                       | 24059  | 10.59 | 6.63 | 15.20 | 9.46E-04 |
| 1427293_a_at | Auts2             | autism susceptibility candidate 2                                                 | 319974 | 6.53  | 2.92 | 15.17 | 7.79E-04 |
| 1419186_a_at | St8sia4           | ST8 alpha-N-acetyl-neuraminide alpha-2,8-sialyltransferase 4                      | 20452  | 11.70 | 7.46 | 15.14 | 1.33E-04 |
| 1452751_at   | Ebf3              | early B-cell factor 3                                                             | 13593  | 8.10  | 3.78 | 15.08 | 4.35E-03 |
| 1426720_at   | Apbb2             | amyloid beta (A4) precursor protein-binding, family B, member 2                   | 11787  | 9.48  | 5.15 | 14.98 | 6.76E-03 |
| 1454678_s_at | A130022J15Rik     | RIKEN cDNA A130022J15 gene                                                        | 101351 | 9.92  | 6.13 | 14.54 | 5.15E-04 |
| 1422820_at   | Lipe              | lipase, hormone sensitive                                                         | 16890  | 6.02  | 2.97 | 14.49 | 2.23E-03 |
| 1423528_at   | Bcas3             | breast carcinoma amplified sequence 3                                             | 192197 | 5.37  | 1.62 | 14.34 | 1.12E-03 |
| 1435587_at   | Pcid2             | PCI domain containing 2                                                           | 234069 | 5.71  | 2.74 | 14.11 | 2.93E-03 |
| 1421987_at   | Papss2            | 3'-phosphoadenosine 5'-phosphosulfate synthase 2                                  | 23972  | 8.44  | 4.40 | 13.79 | 1.98E-04 |
| 1418673_at   | Snai2             | snail homolog 2 (Drosophila)                                                      | 20583  | 7.23  | 4.51 | 13.39 | 7.74E-03 |
| 1426167_a_at | Camk4             | calcium/calmodulin-dependent protein kinase IV                                    | 12326  | 5.39  | 2.34 | 13.34 | 2.72E-03 |
| 1444422_at   | Pcdh19            | protocadherin 19                                                                  | 279653 | 7.49  | 4.12 | 13.24 | 3.01E-03 |
| 1440358_at   | Arhgef15          | Rho guanine nucleotide exchange factor (GEF) 15                                   | 442801 | 10.84 | 6.47 | 13.21 | 4.94E-03 |
| 1438874_at   | Nme7              | non-metastatic cells 7, protein expressed in (nucleoside-diphosphate kinase)      | 171567 | 5.49  | 2.44 | 13.15 | 2.12E-03 |
| 1438585_at   | Syne2             | synaptic nuclear envelope 2                                                       | 319565 | 7.70  | 4.47 | 13.08 | 2.91E-04 |
| 1426431_at   | Jag2              | jagged 2                                                                          | 16450  | 9.18  | 5.54 | 12.99 | 2.22E-05 |
| 1460356_at   | Esam              | endothelial cell-specific adhesion molecule                                       | 69524  | 11.46 | 7.90 | 12.72 | 3.33E-04 |
| 1449521_at   | Cd93              | CD93 antigen                                                                      | 17064  | 10.40 | 6.68 | 12.66 | 1.32E-03 |
| 1444056_at   | ---               | ---                                                                               | ---    | 5.22  | 1.80 | 12.64 | 7.60E-03 |
| 1420459_at   | Ripply3           | rippy3 homolog (zebrafish)                                                        | 170765 | 10.11 | 5.83 | 12.59 | 7.22E-03 |



|              |               |                                                                                             |        |       |      |       |          |
|--------------|---------------|---------------------------------------------------------------------------------------------|--------|-------|------|-------|----------|
| 1437865_at   | Spata13       | spermatogenesis associated 13                                                               | 219140 | 10.58 | 7.40 | 12.53 | 1.96E-03 |
| 1425518_at   | Rapgef4       | Rap guanine nucleotide exchange factor (GEF) 4                                              | 56508  | 7.03  | 4.01 | 12.24 | 2.48E-03 |
| 1422707_at   | Pik3cg        | phosphoinositide-3-kinase, catalytic, gamma polypeptide                                     | 30955  | 5.55  | 2.17 | 12.02 | 1.13E-03 |
| 1434252_at   | Tmcc3         | transmembrane and coiled coil domains 3                                                     | 319880 | 9.01  | 5.04 | 12.01 | 1.67E-03 |
| 1427010_s_at | Lama5         | laminin, alpha 5                                                                            | 16776  | 8.97  | 5.54 | 11.92 | 9.60E-04 |
| 1423862_at   | Plekhf2       | pleckstrin homology domain containing, family F (with FYVE domain) member 2                 | 71801  | 6.66  | 3.50 | 11.88 | 6.92E-03 |
| 1451733_at   | Gcnt2         | glucosaminyl (N-acetyl) transferase 2, 1-branching enzyme                                   | 14538  | 9.73  | 5.59 | 11.84 | 2.27E-03 |
| 1419759_at   | Abcb1a        | ATP-binding cassette, sub-family B (MDR/TAP), member 1A                                     | 18671  | 10.00 | 6.36 | 11.65 | 3.39E-03 |
| 1416072_at   | Cd34          | CD34 antigen                                                                                | 12490  | 11.00 | 7.33 | 11.57 | 9.95E-06 |
| 1438667_at   | 5730410E15Rik | RIKEN cDNA 5730410E15 gene                                                                  | 319613 | 5.31  | 2.63 | 11.57 | 9.69E-03 |
| 1448416_at   | Mgp           | matrix Gla protein                                                                          | 17313  | 11.02 | 7.39 | 11.47 | 5.43E-04 |
| 1416589_at   | Sparc         | secreted acidic cysteine rich glycoprotein                                                  | 20692  | 13.00 | 9.35 | 11.44 | 2.64E-04 |
| 1428384_at   | D4Bwg0951e    | DNA segment, Chr 4, Brigham & Women's Genetics 0951 expressed                               | 52829  | 7.40  | 4.13 | 11.39 | 7.95E-03 |
| 1417235_at   | Ehd3          | EH-domain containing 3                                                                      | 57440  | 6.44  | 2.85 | 11.36 | 7.54E-03 |
| 1418746_at   | Pnkd          | paroxysmal nonkinesiogetic dyskinesia                                                       | 56695  | 6.97  | 3.76 | 11.34 | 9.20E-04 |
| 1456424_s_at | Pltp          | phospholipid transfer protein                                                               | 18830  | 12.68 | 9.12 | 11.26 | 3.76E-05 |
| 1416992_at   | Mfng          | MFNG O-fucosylpeptide 3-beta-N-acetylglucosaminyltransferase                                | 17305  | 8.35  | 4.97 | 11.22 | 2.76E-03 |
| 1422263_at   | Bdkrb2        | bradykinin receptor, beta 2                                                                 | 12062  | 5.39  | 1.67 | 11.11 | 6.88E-04 |
| 1415983_at   | Lcp1          | lymphocyte cytosolic protein 1                                                              | 18826  | 6.93  | 3.64 | 11.04 | 9.92E-03 |
| 1427640_a_at | Runx1t1       | runt-related transcription factor 1; translocated to, 1 (cyclin D-related)                  | 12395  | 5.68  | 2.01 | 10.97 | 9.62E-03 |
| 1422184_a_at | Ak1           | adenylate kinase 1                                                                          | 11636  | 5.31  | 2.30 | 10.93 | 9.67E-03 |
| 1418106_at   | Hey2          | hairly/enhancer-of-split related with YRPW motif 2                                          | 15214  | 7.99  | 3.47 | 10.86 | 8.90E-03 |
| 1455340_at   | Dennd5b       | DENN/MADD domain containing 5B                                                              | 320560 | 7.52  | 3.96 | 10.71 | 8.26E-04 |
| 1437149_at   | Slc6a6        | solute carrier family 6 (neurotransmitter transporter, taurine), member 6                   | 21366  | 11.31 | 7.53 | 10.65 | 3.21E-03 |
| 1436801_x_at | Cdc42ep4      | CDC42 effector protein (Rho GTPase binding) 4                                               | 56699  | 9.28  | 5.90 | 10.51 | 7.75E-05 |
| 1434010_at   | Als2cr13      | amyotrophic lateral sclerosis 2 (juvenile) chromosome region, candidate 13 (human)          | 72750  | 8.91  | 6.00 | 10.46 | 1.20E-03 |
| 1432273_a_at | Darc          | Duffy blood group, chemokine receptor                                                       | 13349  | 7.13  | 4.20 | 10.42 | 1.55E-03 |
| 1456070_at   | Ptprg         | protein tyrosine phosphatase, receptor type, G                                              | 19270  | 9.25  | 5.81 | 10.42 | 2.51E-04 |
| 1451924_a_at | Edn1          | endothelin 1                                                                                | 13614  | 8.85  | 5.25 | 10.27 | 6.70E-06 |
| 1437669_x_at | Ccr1          | Chemokine (C-C motif) receptor-like 1                                                       | 252837 | 9.49  | 6.22 | 10.25 | 1.18E-04 |
| 1423611_at   | Alpl          | alkaline phosphatase, liver/bone/kidney                                                     | 11647  | 8.08  | 5.11 | 10.25 | 4.89E-03 |
| 1428344_at   | Ppapdc2       | phosphatidic acid phosphatase type 2 domain containing 2                                    | 74411  | 8.80  | 5.67 | 10.13 | 2.76E-03 |
| 1429691_at   | Ptprg         | protein tyrosine phosphatase, receptor type, G                                              | 19270  | 11.19 | 7.48 | 10.08 | 4.00E-04 |
| 1450650_at   | Myo10         | myosin X                                                                                    | 17909  | 8.17  | 4.94 | 9.91  | 2.00E-03 |
| 1451263_a_at | Fabp4         | fatty acid binding protein 4, adipocyte                                                     | 11770  | 13.32 | 9.77 | 9.90  | 2.60E-04 |
| 1455251_at   | Itga1         | integrin alpha 1                                                                            | 109700 | 11.14 | 8.48 | 9.89  | 5.56E-03 |
| 1418058_at   | Elt1          | EGF, latrophilin seven transmembrane domain containing 1                                    | 170757 | 10.92 | 7.65 | 9.87  | 3.96E-06 |
| 1418004_a_at | Tmem176b      | transmembrane protein 176B                                                                  | 65963  | 10.80 | 7.77 | 9.84  | 8.33E-04 |
| 1439680_at   | Tnfsf10       | tumor necrosis factor (ligand) superfamily, member 10                                       | 22035  | 9.54  | 6.42 | 9.76  | 6.75E-05 |
| 1439633_at   | Syt7          | synaptotagmin VII                                                                           | 54525  | 6.30  | 3.58 | 9.75  | 5.78E-03 |
| 1460330_at   | Anxa3         | annexin A3                                                                                  | 11745  | 8.56  | 5.77 | 9.75  | 5.59E-03 |
| 1459524_at   | Mcc           | mutated in colorectal cancers                                                               | 328949 | 8.70  | 5.47 | 9.69  | 2.08E-03 |
| 1420148_at   | Slc6a6        | solute carrier family 6 (neurotransmitter transporter, taurine), member 6                   | 21366  | 8.11  | 5.09 | 9.62  | 4.82E-04 |
| 1424155_at   | Fabp4         | fatty acid binding protein 4, adipocyte                                                     | 11770  | 6.98  | 3.97 | 9.60  | 3.87E-04 |
| 1450651_at   | Myo10         | myosin X                                                                                    | 17909  | 9.32  | 6.57 | 9.48  | 3.31E-03 |
| 1417292_at   | Ifi47         | interferon gamma inducible protein 47                                                       | 15953  | 8.30  | 4.36 | 9.44  | 7.90E-03 |
| 1454731_at   | Myo10         | myosin X                                                                                    | 17909  | 9.50  | 6.42 | 9.41  | 2.54E-04 |
| 1418059_at   | Elt1          | EGF, latrophilin seven transmembrane domain containing 1                                    | 170757 | 10.79 | 8.00 | 9.36  | 3.90E-03 |
| 1439272_at   | Lcorl         | ligand dependent nuclear receptor corepressor like                                          | 209707 | 5.44  | 2.58 | 9.34  | 9.00E-03 |
| 1437636_at   | LOC623121     | similar to Interferon-activatable protein 203 (Ifi-203) (Interferon-inducible protein p203) | 623121 | 6.38  | 3.18 | 9.33  | 1.26E-03 |
| 1424956_at   | Ahdc1         | AT hook, DNA binding motif, containing 1                                                    | 230793 | 5.08  | 2.23 | 9.30  | 1.09E-03 |
| 1434261_at   | Sipa1l2       | signal-induced proliferation-associated 1 like 2                                            | 244668 | 9.29  | 5.86 | 9.27  | 1.98E-03 |
| 1416511_a_at | Cdc42ep4      | CDC42 effector protein (Rho GTPase binding) 4                                               | 56699  | 8.97  | 5.74 | 9.20  | 2.95E-03 |
| 1444821_at   | D8Erd82e      | DNA segment, Chr 8, ERATO Doi 82, expressed                                                 | 244418 | 5.54  | 2.10 | 9.17  | 2.76E-03 |
| 1422634_a_at | Vsig2         | V-set and immunoglobulin domain containing 2                                                | 57276  | 6.42  | 3.21 | 9.16  | 4.98E-03 |
| 1456046_at   | Cd93          | CD93 antigen                                                                                | 17064  | 11.77 | 8.63 | 9.13  | 2.62E-04 |
| 1423488_at   | Mmd           | monocyte to macrophage differentiation-associated                                           | 67468  | 8.64  | 5.55 | 9.12  | 8.68E-06 |
| 1442683_at   | Hmg20a        | high mobility group 20A                                                                     | 66867  | 5.33  | 2.31 | 9.08  | 3.08E-04 |
| 1421172_at   | Adam12        | a disintegrin and metallopeptidase domain 12 (meltrin alpha)                                | 11489  | 5.64  | 2.26 | 9.05  | 3.91E-03 |
| 1434445_at   | D15Wsu169e    | DNA segment, Chr 15, Wayne State University 169, expressed                                  | 223666 | 6.53  | 3.43 | 9.02  | 7.72E-03 |
| 1450391_a_at | Mgll          | monoglyceride lipase                                                                        | 23945  | 11.47 | 8.59 | 8.97  | 1.01E-04 |
| 1449852_a_at | Ehd4          | EH-domain containing 4                                                                      | 98878  | 11.57 | 8.14 | 8.87  | 2.12E-04 |
| 1450377_at   | Thbs1         | thrombospondin 1                                                                            | 21825  | 9.97  | 7.26 | 8.85  | 4.55E-03 |
| 1420425_at   | Prdm1         | PR domain containing 1, with ZNF domain                                                     | 12142  | 7.86  | 4.60 | 8.84  | 1.28E-03 |
| 1427034_at   | Ace           | angiotensin I converting enzyme (peptidyl-dipeptidase A) 1                                  | 11421  | 8.92  | 5.62 | 8.77  | 3.86E-03 |
| 1429184_at   | Gvin1         | GTPase, very large interferon inducible 1                                                   | 74558  | 11.11 | 8.46 | 8.75  | 7.66E-03 |

|              |               |                                                                                              |        |       |      |      |          |
|--------------|---------------|----------------------------------------------------------------------------------------------|--------|-------|------|------|----------|
| 1436525_at   | Ap3s2         | adaptor-related protein complex 3, sigma 2 subunit                                           | 11778  | 5.86  | 3.21 | 8.70 | 8.62E-03 |
| 1436341_at   | Hmbox1        | homeobox containing 1                                                                        | 219150 | 8.06  | 4.39 | 8.65 | 8.23E-03 |
| 1434360_s_at | Ptprg         | protein tyrosine phosphatase, receptor type, G                                               | 19270  | 11.63 | 8.35 | 8.54 | 9.02E-03 |
| 1448436_a_at | Irf1          | interferon regulatory factor 1                                                               | 16362  | 10.11 | 7.45 | 8.51 | 5.77E-04 |
| 1448392_at   | Sparc         | secreted acidic cysteine rich glycoprotein                                                   | 20692  | 12.98 | 9.50 | 8.41 | 1.22E-03 |
| 1433741_at   | Cd38          | CD38 antigen                                                                                 | 12494  | 9.94  | 6.65 | 8.40 | 5.00E-04 |
| 1421065_at   | Jak2          | Janus kinase 2                                                                               | 16452  | 5.16  | 1.68 | 8.37 | 8.01E-03 |
| 1418669_at   | Hspg2         | perlecan (heparan sulfate proteoglycan 2)                                                    | 15530  | 11.88 | 9.47 | 8.26 | 8.93E-03 |
| 1453557_at   | 4930562F07Rik | RIKEN cDNA 4930562F07 gene                                                                   | 75255  | 8.02  | 5.22 | 8.20 | 9.52E-04 |
| 1436425_at   | Kank4         | KN motif and ankyrin repeat domains 4                                                        | 242553 | 5.61  | 3.02 | 8.13 | 5.08E-03 |
| 1420410_at   | Nr5a2         | nuclear receptor subfamily 5, group A, member 2                                              | 26424  | 6.74  | 4.13 | 7.96 | 1.10E-03 |
| 1427646_a_at | Arhgef2       | rho/rac guanine nucleotide exchange factor (GEF) 2                                           | 16800  | 6.25  | 3.73 | 7.96 | 3.23E-03 |
| 1448899_s_at | Rad51ap1      | RAD51 associated protein 1                                                                   | 19362  | 5.18  | 2.41 | 7.93 | 6.98E-03 |
| 1420973_at   | Arid5b        | AT rich interactive domain 5B (MRF1-like)                                                    | 71371  | 8.89  | 5.66 | 7.90 | 4.37E-03 |
| 1424988_at   | Myiip         | myosin regulatory light chain interacting protein                                            | 218203 | 8.01  | 5.22 | 7.82 | 4.78E-03 |
| 1449888_at   | Epas1         | endothelial PAS domain protein 1                                                             | 13819  | 11.28 | 8.36 | 7.81 | 6.11E-05 |
| 1418920_at   | Cldn15        | claudin 15                                                                                   | 60363  | 9.24  | 6.54 | 7.78 | 6.63E-03 |
| 1434112_at   | Lphn2         | latrophilin 2                                                                                | 99633  | 8.81  | 5.84 | 7.63 | 5.96E-04 |
| 1427137_at   | Ces5          | carboxylesterase 5                                                                           | 234673 | 7.22  | 4.55 | 7.60 | 8.94E-04 |
| 1422786_at   | Slc30a1       | solute carrier family 30 (zinc transporter), member 1                                        | 22782  | 9.58  | 6.67 | 7.54 | 6.24E-04 |
| 1429351_at   | Klhl24        | kelch-like 24 (Drosophila)                                                                   | 75785  | 7.00  | 4.20 | 7.52 | 8.73E-05 |
| 1460302_at   | Thbs1         | thrombospondin 1                                                                             | 21825  | 9.25  | 6.46 | 7.51 | 4.03E-04 |
| 1449025_at   | Ifit3         | interferon-induced protein with tetratricopeptide repeats 3                                  | 15959  | 9.46  | 7.11 | 7.45 | 5.56E-03 |
| 1416541_at   | Clpb          | ClpB caseinolytic peptidase B homolog (E. coli)                                              | 20480  | 6.17  | 2.42 | 7.42 | 6.99E-03 |
| 1417965_at   | Plekha1       | pleckstrin homology domain containing, family A (phosphoinositide binding specific) member 1 | 101476 | 8.18  | 4.80 | 7.40 | 8.93E-03 |
| 1448467_a_at | Ehbp11        | EH domain binding protein 1-like 1                                                           | 114601 | 6.74  | 4.30 | 7.35 | 1.39E-03 |
| 1436164_at   | Slc30a1       | solute carrier family 30 (zinc transporter), member 1                                        | 22782  | 11.83 | 8.74 | 7.27 | 1.73E-03 |
| 1438760_x_at | Adam15        | a disintegrin and metalloproteinase domain 15 (metargidin)                                   | 11490  | 9.31  | 6.87 | 7.19 | 4.44E-03 |
| 1425503_at   | Gcnt2         | glucosaminyl (N-acetyl) transferase 2, I-branching enzyme                                    | 14538  | 8.36  | 5.35 | 7.10 | 7.94E-04 |
| 1455020_at   | Snx25         | sorting nexin 25                                                                             | 102141 | 7.59  | 5.16 | 7.07 | 8.23E-04 |
| 1460574_at   | Fat4          | FAT tumor suppressor homolog 4 (Drosophila)                                                  | 329628 | 9.51  | 6.98 | 7.07 | 2.20E-03 |
| 1459886_at   | ---           | ---                                                                                          | ---    | 11.14 | 8.35 | 7.04 | 5.81E-03 |
| 1424989_at   | Orai1         | ORAI calcium release-activated calcium modulator 1                                           | 109305 | 6.43  | 3.62 | 7.00 | 8.79E-04 |
| 1449839_at   | Casp3         | caspase 3                                                                                    | 12367  | 8.35  | 5.47 | 6.97 | 4.20E-03 |
| 1416488_at   | Cng2          | cyclin G2                                                                                    | 12452  | 8.42  | 5.77 | 6.96 | 5.34E-04 |
| 1453285_at   | Tmem88        | transmembrane protein 88                                                                     | 67020  | 10.83 | 7.99 | 6.95 | 1.49E-05 |
| 1430474_a_at | Mtch2         | mitochondrial carrier homolog 2 (C. elegans)                                                 | 56428  | 8.64  | 6.13 | 6.89 | 1.66E-04 |
| 1436907_at   | Nav1          | neuron navigator 1                                                                           | 215690 | 7.94  | 4.73 | 6.87 | 3.46E-03 |
| 1440975_at   | Mxra7         | matrix-remodelling associated 7                                                              | 67622  | 9.31  | 6.63 | 6.86 | 5.10E-03 |
| 1438666_at   | Ldlrad3       | low density lipoprotein receptor class A domain containing 3                                 | 241576 | 9.28  | 6.94 | 6.85 | 3.47E-03 |
| 1434338_at   | Rgp1          | RGP1 retrograde golgi transport homolog (S. cerevisiae)                                      | 242406 | 8.55  | 6.19 | 6.84 | 7.89E-03 |
| 1436919_at   | Trp53i11      | transformation related protein 53 inducible protein 11                                       | 277414 | 8.29  | 5.87 | 6.83 | 8.30E-03 |
| 1448171_at   | Siah2         | seven in absentia 2                                                                          | 20439  | 5.50  | 2.79 | 6.78 | 3.55E-03 |
| 1422443_at   | Xpnpep1       | X-prolyl aminopeptidase (aminopeptidase P) 1, soluble                                        | 170750 | 7.64  | 5.33 | 6.70 | 4.32E-03 |
| 1423407_a_at | Fbln2         | fibulin 2                                                                                    | 14115  | 9.54  | 6.46 | 6.68 | 6.74E-04 |
| 1433748_at   | Zdhc18        | zinc finger, DHHC domain containing 18                                                       | 12452  | 10.13 | 7.15 | 6.57 | 1.49E-03 |
| 1423141_at   | Lipa          | lysosomal acid lipase A                                                                      | 16889  | 10.26 | 8.12 | 6.56 | 9.79E-03 |
| 1426593_a_at | Fbxo22        | F-box protein 22                                                                             | 71999  | 9.38  | 7.02 | 6.55 | 2.65E-03 |
| 1442382_at   | Mast4         | microtubule associated serine/threonine kinase family member 4                               | 328329 | 7.08  | 4.66 | 6.54 | 2.64E-04 |
| 1435260_at   | Akt3          | thymoma viral proto-oncogene 3                                                               | ---    | 9.89  | 7.46 | 6.50 | 7.85E-04 |
| 1426640_s_at | Trib2         | tribbles homolog 2 (Drosophila)                                                              | 217410 | 8.74  | 6.07 | 6.48 | 5.80E-04 |
| 1449341_a_at | Stom          | stomatin                                                                                     | 13830  | 8.40  | 6.19 | 6.47 | 8.66E-03 |
| 1436173_at   | Dlc1          | deleted in liver cancer 1                                                                    | 50768  | 10.96 | 8.17 | 6.47 | 3.34E-07 |
| 1440870_at   | Prdm16        | PR domain containing 16                                                                      | 70673  | 9.94  | 7.58 | 6.45 | 1.97E-03 |
| 1460206_at   | Grasp         | GRP1 (general receptor for phosphoinositides 1)-associated scaffold protein                  | 56149  | 9.52  | 7.25 | 6.45 | 2.14E-03 |
| 1426592_a_at | Fbxo22        | F-box protein 22                                                                             | 71999  | 8.48  | 5.78 | 6.42 | 5.06E-03 |
| 1455613_at   | E130308A19Rik | RIKEN cDNA E130308A19 gene                                                                   | 230259 | 5.41  | 2.51 | 6.41 | 5.65E-03 |
| 1451355_at   | Asah3l        | N-acylsphingosine amidohydrolase 3-like                                                      | 230379 | 10.14 | 7.95 | 6.37 | 6.25E-03 |
| 1421448_at   | Garnl1        | GTPase activating RANGAP domain-like 1                                                       | 56784  | 7.92  | 5.31 | 6.33 | 2.84E-03 |
| 1434115_at   | Cdh13         | cadherin 13                                                                                  | 12554  | 9.62  | 6.92 | 6.28 | 5.23E-05 |
| 1460249_at   | Lnx2          | ligand of numb-protein X 2                                                                   | 140887 | 8.92  | 6.15 | 6.27 | 9.76E-03 |
| 1433837_at   | 8430408G22Rik | RIKEN cDNA 8430408G22 gene                                                                   | 213393 | 9.43  | 6.91 | 6.26 | 1.40E-03 |
| 1451436_at   | Sbno1         | sno, strawberry notch homolog 1 (Drosophila)                                                 | 243272 | 6.96  | 3.91 | 6.26 | 1.43E-03 |
| 1427853_a_at | Hsp25-ps1     | heat shock protein 25, pseudogene 1                                                          | 15508  | 9.61  | 7.23 | 6.22 | 6.31E-03 |
| 1439757_s_at | Epha4         | Eph receptor A4                                                                              | 13838  | 7.02  | 4.73 | 6.19 | 2.96E-04 |
| 1422862_at   | Pdim5         | PDZ and LIM domain 5                                                                         | 56376  | 6.95  | 3.75 | 6.17 | 2.98E-03 |
| 1451911_a_at | Ace           | angiotensin I converting enzyme (peptidyl-dipeptidase A) 1                                   | 11421  | 9.51  | 6.83 | 6.08 | 2.11E-03 |
| 1415849_s_at | Stmn1         | stathmin 1                                                                                   | 16765  | 10.05 | 7.87 | 6.02 | 5.50E-03 |
| 1425964_x_at | Hspb1         | heat shock protein 1                                                                         | 15507  | 9.63  | 6.90 | 6.00 | 3.32E-03 |
| 1452472_at   | Rtp3          | receptor transporter protein 3                                                               | 235636 | 7.61  | 5.49 | 5.99 | 2.86E-03 |
| 1425682_a_at | Tprkb         | Tp53rk binding protein                                                                       | 69786  | 5.58  | 3.26 | 5.97 | 8.17E-03 |
| 1434322_at   | Micall2       | MICAL-like 2                                                                                 | 231830 | 7.83  | 4.62 | 5.90 | 3.55E-03 |

|              |               |                                                                                              |        |       |       |      |          |
|--------------|---------------|----------------------------------------------------------------------------------------------|--------|-------|-------|------|----------|
| 1448737_at   | Tspan7        | tetraspanin 7                                                                                | 21912  | 12.20 | 9.57  | 5.86 | 6.17E-04 |
| 1442684_x_at | Hmg20a        | high mobility group 20A                                                                      | 66867  | 5.15  | 2.64  | 5.82 | 5.37E-04 |
| 1427996_at   | BC028528      | cDNA sequence BC028528                                                                       | 229600 | 11.48 | 9.39  | 5.80 | 4.78E-03 |
| 1438779_at   | Col4a3        | collagen, type IV, alpha 3                                                                   | 12828  | 5.17  | 2.77  | 5.80 | 4.64E-03 |
| 1439926_at   | Heg1          | HEG homolog 1 (zebrafish)                                                                    | 77446  | 7.33  | 4.21  | 5.80 | 5.65E-03 |
| 1418670_s_at | Hspg2         | perlecan (heparan sulfate proteoglycan 2)                                                    | 15530  | 10.25 | 7.95  | 5.79 | 3.66E-04 |
| 1424567_at   | Tspan2        | tetraspanin 2                                                                                | 70747  | 8.90  | 6.69  | 5.70 | 8.10E-04 |
| 1445134_at   | Mkl2          | MKL/myocardin-like 2                                                                         | 239719 | 10.18 | 7.27  | 5.62 | 5.28E-03 |
| 1416630_at   | Id3           | inhibitor of DNA binding 3                                                                   | 15903  | 9.72  | 7.32  | 5.58 | 7.78E-04 |
| 1435902_at   | Nudt18        | nudix (nucleoside diphosphate linked moiety X)-type motif 18                                 | 213484 | 6.28  | 3.46  | 5.54 | 1.43E-03 |
| 1433836_a_at | 8430408G22Rik | RIKEN cDNA 8430408G22 gene                                                                   | 213393 | 11.00 | 8.38  | 5.48 | 4.75E-04 |
| 1422642_at   | Cdc42ep3      | CDC42 effector protein (Rho GTPase binding) 3                                                | 260409 | 8.01  | 5.89  | 5.47 | 3.27E-03 |
| 1451860_a_at | Trim30        | tripartite motif-containing 30                                                               | 20128  | 8.32  | 5.55  | 5.46 | 3.21E-03 |
| 1437956_at   | Pik3r6        | phosphoinositide-3-kinase, regulatory subunit 6                                              | 104709 | 6.88  | 4.03  | 5.44 | 7.72E-03 |
| 1435553_at   | Pdzd2         | PDZ domain containing 2                                                                      | 68070  | 9.21  | 6.65  | 5.42 | 1.49E-04 |
| 1418285_at   | Efnb1         | ephrin B1                                                                                    | 13641  | 8.09  | 5.41  | 5.40 | 8.10E-03 |
| 1453908_at   | Ptprb         | protein tyrosine phosphatase, receptor type, B                                               | 19263  | 10.12 | 8.03  | 5.38 | 4.04E-03 |
| 1454708_at   | Ablim1        | actin-binding LIM protein 1                                                                  | 226251 | 10.76 | 8.83  | 5.36 | 6.67E-03 |
| 1452519_a_at | Zfp36         | zinc finger protein 36                                                                       | 22695  | 11.85 | 9.50  | 5.34 | 9.51E-04 |
| 1455575_at   | Eif4ebp2      | eukaryotic translation initiation factor 4E binding protein 2                                | 13688  | 7.88  | 4.88  | 5.33 | 6.87E-03 |
| 1438559_x_at | Slc44a2       | solute carrier family 44, member 2                                                           | 68682  | 11.53 | 9.69  | 5.29 | 4.82E-03 |
| 1429514_at   | Ppap2b        | phosphatidic acid phosphatase type 2B                                                        | 67916  | 11.86 | 9.22  | 5.27 | 5.94E-04 |
| 1426785_s_at | Mgll          | monoglyceride lipase                                                                         | 23945  | 11.79 | 9.36  | 5.26 | 1.67E-04 |
| 1422570_at   | Yy1           | YY1 transcription factor                                                                     | 22632  | 8.54  | 6.55  | 5.25 | 2.39E-03 |
| 1460436_at   | Ndst1         | N-deacetylase/N-sulfotransferase (heparan glucosaminyl) 1                                    | 15531  | 9.58  | 7.66  | 5.22 | 1.28E-03 |
| 1417288_at   | Plekha2       | pleckstrin homology domain-containing, family A (phosphoinositide binding specific) member 2 | 83436  | 6.35  | 4.39  | 5.10 | 7.23E-03 |
| 1417985_at   | Nrarp         | Notch-regulated ankyrin repeat protein                                                       | 67122  | 9.79  | 7.30  | 5.08 | 3.48E-03 |
| 1448908_at   | Ppap2b        | phosphatidic acid phosphatase type 2B                                                        | 67916  | 10.04 | 7.66  | 5.04 | 5.48E-04 |
| 1417434_at   | Gpd2          | glycerol phosphate dehydrogenase 2, mitochondrial                                            | 14571  | 9.11  | 7.08  | 5.04 | 8.51E-04 |
| 1434487_at   | Mef2d         | myocyte enhancer factor 2D                                                                   | 17261  | 7.19  | 5.10  | 5.03 | 5.26E-04 |
| 1455518_at   | ---           | ---                                                                                          | ---    | 7.00  | 4.95  | 5.03 | 4.80E-03 |
| 1421918_at   | Anp32a        | acidic (leucine-rich) nuclear phosphoprotein 32 family, member A                             | 11737  | 7.27  | 4.93  | 4.94 | 5.45E-03 |
| 1438910_a_at | Stom          | stomatin                                                                                     | 13830  | 8.73  | 6.27  | 4.94 | 7.02E-04 |
| 1422943_a_at | Hspb1         | heat shock protein 1                                                                         | 15507  | 10.11 | 7.82  | 4.93 | 6.87E-03 |
| 1450206_at   | Dlc1          | deleted in liver cancer 1                                                                    | 50768  | 11.86 | 9.83  | 4.92 | 9.61E-03 |
| 1437197_at   | Sorbs2        | sorbin and SH3 domain containing 2                                                           | 234214 | 9.54  | 6.84  | 4.90 | 3.98E-03 |
| 1420972_at   | Arid5b        | AT rich interactive domain 5B (MRF1-like)                                                    | 71371  | 9.12  | 7.05  | 4.75 | 1.92E-03 |
| 1422673_at   | Prkd1         | protein kinase D1                                                                            | 18760  | 7.91  | 6.00  | 4.68 | 7.59E-03 |
| 1455626_at   | Hoxa9         | homeo box A9                                                                                 | 15405  | 8.18  | 5.80  | 4.65 | 4.71E-03 |
| 1426994_at   | Phlpp         | PH domain and leucine rich repeat protein phosphatase                                        | 98432  | 9.06  | 6.91  | 4.65 | 4.07E-03 |
| 1436367_at   | ---           | ---                                                                                          | 327823 | 11.76 | 9.97  | 4.63 | 5.48E-03 |
| 1450824_at   | Ptch1         | patched homolog 1                                                                            | 19206  | 5.46  | 3.31  | 4.63 | 1.28E-03 |
| 1455037_at   | Pixna2        | plexin A2                                                                                    | 18845  | 9.72  | 7.60  | 4.61 | 2.25E-03 |
| 1433691_at   | Ppp1r3c       | protein phosphatase 1, regulatory (inhibitor) subunit 3C                                     | 53412  | 5.80  | 3.97  | 4.61 | 8.17E-03 |
| 1459888_at   | LOC545261     | hypothetical protein LOC545261                                                               | 545261 | 10.15 | 7.49  | 4.60 | 4.60E-03 |
| 1434434_s_at | Tcerg1        | transcription elongation regulator 1 (CA150)                                                 | 56070  | 7.47  | 4.87  | 4.58 | 4.75E-03 |
| 1453188_at   | 6230424C14Rik | RIKEN cDNA 6230424C14 gene                                                                   | 67786  | 10.10 | 8.04  | 4.58 | 3.72E-04 |
| 1447584_s_at | Myc1          | myc target 1                                                                                 | 68632  | 11.19 | 9.28  | 4.57 | 2.95E-03 |
| 1434403_at   | Spred2        | sprouty-related, EVH1 domain containing 2                                                    | 114716 | 8.98  | 7.01  | 4.53 | 7.94E-03 |
| 1429772_at   | Pixna2        | plexin A2                                                                                    | 18845  | 10.70 | 8.53  | 4.51 | 1.99E-03 |
| 1456532_at   | Pdgfd         | platelet-derived growth factor, D polypeptide                                                | 71785  | 8.79  | 6.95  | 4.49 | 4.66E-03 |
| 1451908_a_at | Sec14l1       | SEC14-like 1 (S. cerevisiae)                                                                 | 74136  | 8.97  | 6.67  | 4.43 | 6.11E-03 |
| 1418286_a_at | Efnb1         | ephrin B1                                                                                    | 13641  | 8.71  | 6.79  | 4.43 | 8.82E-04 |
| 1418921_at   | Cadm3         | cell adhesion molecule 3                                                                     | 94332  | 7.82  | 5.39  | 4.41 | 4.15E-03 |
| 1460740_at   | Cltb          | clathrin, light polypeptide (Lcb)                                                            | 74325  | 6.77  | 4.60  | 4.36 | 2.21E-03 |
| 1435825_at   | Acvr1l        | activin A receptor, type II-like 1                                                           | 11482  | 9.56  | 7.67  | 4.35 | 2.98E-03 |
| 1423584_at   | Igfbp7        | insulin-like growth factor binding protein 7                                                 | 29817  | 13.49 | 11.20 | 4.29 | 5.65E-04 |
| 1450696_at   | Psbm9         | proteasome (prosome, macropain) subunit, beta type 9 (large multifunctional peptidase 2)     | 16912  | 10.06 | 7.93  | 4.27 | 9.07E-03 |
| 1422444_at   | Itga6         | integrin alpha 6                                                                             | 16403  | 11.68 | 9.14  | 4.26 | 2.23E-03 |
| 1439485_at   | Zfp608        | zinc finger protein 608                                                                      | 269023 | 6.43  | 4.74  | 4.25 | 5.49E-03 |
| 1454984_at   | Lifr          | leukemia inhibitory factor receptor                                                          | 106020 | 10.09 | 8.09  | 4.24 | 3.99E-03 |
| 1454671_at   | Insig1        | insulin induced gene 1                                                                       | 231070 | 9.49  | 7.54  | 4.22 | 2.78E-03 |
| 1456538_at   | Sdccag8       | serologically defined colon cancer antigen 8                                                 | 76816  | 9.13  | 7.11  | 4.22 | 1.34E-03 |
| 1427486_at   | Ptprb         | protein tyrosine phosphatase, receptor type, B                                               | 19263  | 11.91 | 9.76  | 4.21 | 1.26E-04 |
| 1440642_at   | D630042P16Rik | RIKEN cDNA D630042P16 gene                                                                   | 243612 | 7.46  | 5.36  | 4.19 | 4.66E-03 |
| 1452852_at   | Twistnb       | TWIST neighbor                                                                               | 28071  | 8.81  | 7.00  | 4.19 | 2.22E-03 |
| 1440867_at   | Spry4         | sprouty homolog 4 (Drosophila)                                                               | 24066  | 7.28  | 5.71  | 4.17 | 6.04E-03 |
| 1429543_at   | 6230424C14Rik | RIKEN cDNA 6230424C14 gene                                                                   | 67786  | 11.38 | 9.22  | 4.16 | 2.40E-03 |
| 1445301_at   | ---           | ---                                                                                          | 229600 | 6.93  | 4.68  | 4.04 | 1.03E-03 |
| 1418483_a_at | Ggta1         | glycoprotein galactosyltransferase alpha 1, 3                                                | 14594  | 10.24 | 8.37  | 3.93 | 6.61E-03 |
| 1460603_at   | Samd9l        | sterile alpha motif domain containing 9-like                                                 | 209086 | 8.15  | 6.42  | 3.91 | 3.04E-03 |
| 1424535_at   | Tctn3         | tectonic family member 3                                                                     | 67590  | 5.33  | 3.50  | 3.89 | 6.54E-03 |
| 1460039_at   | Clec1a        | C-type lectin domain family 1, member a                                                      | 243653 | 8.25  | 5.97  | 3.88 | 1.67E-03 |
| 1440225_at   | Gpr116        | G protein-coupled receptor 116                                                               | 224792 | 11.10 | 9.25  | 3.87 | 1.13E-04 |
| 1416805_at   | 1110032E23Rik | RIKEN cDNA 1110032E23 gene                                                                   | 68659  | 9.76  | 7.81  | 3.80 | 5.48E-03 |
| 1447975_a_at | LOC545261     | hypothetical protein LOC545261                                                               | 545261 | 9.79  | 7.57  | 3.79 | 1.93E-03 |
| 1423613_at   | Ssf2          | sperm specific antigen 2                                                                     | 70599  | 7.70  | 5.68  | 3.79 | 3.38E-03 |
| 1426977_at   | Usp47         | ubiquitin specific peptidase 47                                                              | 74996  | 8.82  | 6.69  | 3.76 | 2.35E-03 |
| 1416330_at   | Cd81          | CD81 antigen                                                                                 | 12520  | 12.65 | 10.80 | 3.71 | 4.35E-05 |
| 1427854_x_at | Hsp25-ps1     | heat shock protein 25, pseudogene 1                                                          | 15508  | 8.67  | 6.91  | 3.71 | 6.37E-03 |
| 1419301_at   | Fzd4          | frizzled homolog 4 (Drosophila)                                                              | 14366  | 9.57  | 7.59  | 3.69 | 3.03E-03 |

|              |               |                                                                                                             |           |       |       |      |          |
|--------------|---------------|-------------------------------------------------------------------------------------------------------------|-----------|-------|-------|------|----------|
| 1449461_at   | Rbp7          | retinol binding protein 7, cellular DNA segment, Chr 1, Brigham & Women's Genetics 0212 expressed           | 63954     | 10.56 | 8.99  | 3.66 | 8.26E-04 |
| 1452824_at   | D1Bwg0212e    | neural precursor cell expressed, developmentally down-regulated gene 9                                      | 52846     | 6.66  | 5.14  | 3.62 | 7.21E-03 |
| 1422818_at   | Nedd9         | tetratricopeptide repeat domain 9C                                                                          | 18003     | 8.58  | 6.93  | 3.62 | 3.37E-03 |
| 1430569_at   | Ttc9c         | TSC22 domain family, member 1                                                                               | 70387     | 8.90  | 6.81  | 3.59 | 1.26E-03 |
| 1454758_a_at | Tsc22d1       | unc-45 homolog B (C. elegans)                                                                               | 21807     | 11.04 | 9.13  | 3.55 | 2.46E-04 |
| 1436939_at   | Unc45b        | huntingtin interacting protein 1                                                                            | 217012    | 10.74 | 8.68  | 3.54 | 2.02E-03 |
| 1424755_at   | Hip1          | myeloid/lymphoid or mixed-lineage leukemia (trithorax homolog, Drosophila); translocated to, 4              | 215114    | 9.87  | 7.98  | 3.53 | 3.08E-03 |
| 1436303_at   | Mllt4         | chemokine (C-X-C motif) ligand 9                                                                            | 17356     | 9.93  | 7.64  | 3.51 | 8.52E-03 |
| 1456907_at   | Cxcl9         | transmembrane protein 57                                                                                    | 17329     | 5.99  | 4.26  | 3.48 | 7.65E-03 |
| 1428884_at   | Tmem57        | solute carrier family 46, member 3                                                                          | 66146     | 9.30  | 7.45  | 3.47 | 8.90E-03 |
| 1451486_at   | Slc46a3       | Kruppel-like factor 2 (lung)                                                                                | 71706     | 6.05  | 4.50  | 3.46 | 2.73E-03 |
| 1448890_at   | Klf2          | CD200 antigen                                                                                               | 16598     | 9.21  | 7.34  | 3.45 | 3.86E-03 |
| 1448788_at   | Cd200         | collagen, type IV, alpha 2                                                                                  | 17470     | 11.73 | 10.05 | 3.43 | 8.69E-05 |
| 1424051_at   | Col4a2        | exocyst complex component 6                                                                                 | 12827     | 12.32 | 10.55 | 3.41 | 7.24E-04 |
| 1460576_at   | Exoc6         | leucine zipper protein 1                                                                                    | 107371    | 9.59  | 8.09  | 3.41 | 9.42E-04 |
| 1416469_at   | Luzp1         | poliovirus receptor                                                                                         | 269593    | 8.01  | 6.06  | 3.40 | 9.93E-04 |
| 1451160_s_at | Pvr           | low density lipoprotein receptor-related protein associated protein 1                                       | 52118     | 8.06  | 6.56  | 3.35 | 3.47E-03 |
| 1426697_a_at | Lrpap1        | kelch-like 24 (Drosophila)                                                                                  | 16976     | 7.10  | 5.46  | 3.34 | 1.24E-03 |
| 1428651_at   | Klh24         | ST6 (alpha-N-acetylneuraminy-2,3-beta-galactosyl-1,3)-N-acetylgalactosaminide alpha-2,6-sialyltransferase 3 | 75785     | 10.75 | 9.07  | 3.33 | 3.90E-03 |
| 1420903_at   | St6galnac3    | TAP binding protein                                                                                         | 20447     | 9.99  | 8.65  | 3.32 | 8.19E-03 |
| 1450378_at   | Tapbp         | ---                                                                                                         | 21356     | 8.04  | 6.24  | 3.30 | 9.40E-03 |
| 1444834_at   | ---           | ---                                                                                                         | ---       | 5.40  | 3.65  | 3.29 | 1.46E-03 |
| 1452734_at   | Rnaset2b      | ribonuclease T2B                                                                                            | 68195     | 10.79 | 8.92  | 3.25 | 7.37E-04 |
| 1425094_a_at | Lhx6          | LIM homeobox protein 6                                                                                      | 16874     | 6.65  | 4.80  | 3.22 | 9.61E-04 |
| 1428559_at   | Kdsr          | 3-ketodihydroshingosine reductase                                                                           | 70750     | 8.71  | 7.03  | 3.22 | 3.29E-03 |
| 1423392_at   | Clic4         | chloride intracellular channel 4 (mitochondrial)                                                            | 29876     | 11.58 | 10.13 | 3.22 | 5.70E-03 |
| 1448126_at   | Fam60a        | family with sequence similarity 60, member A                                                                | 56306     | 7.86  | 6.10  | 3.21 | 1.20E-03 |
| 1438310_at   | ---           | ---                                                                                                         | ---       | 6.31  | 4.47  | 3.19 | 2.25E-04 |
| 1422445_at   | Itga6         | integrin alpha 6                                                                                            | 16403     | 11.03 | 9.24  | 3.19 | 7.95E-03 |
| 1434339_at   | Fnbp1l        | formin binding protein 1-like                                                                               | 214459    | 9.06  | 7.06  | 3.19 | 1.79E-03 |
| 1452175_at   | 1810026J23Rik | RIKEN cDNA 1810026J23 gene                                                                                  | 69773     | 7.07  | 5.59  | 3.18 | 3.60E-03 |
| 1418643_at   | Tspan13       | tetraspanin 13                                                                                              | 66109     | 11.41 | 9.78  | 3.16 | 6.65E-04 |
| 1434070_at   | Jag1          | jagged 1                                                                                                    | 16449     | 9.65  | 8.17  | 3.15 | 2.83E-03 |
| 1456212_x_at | Socs3         | suppressor of cytokine signaling 3                                                                          | 12702     | 7.94  | 5.83  | 3.13 | 4.67E-03 |
| 1436248_at   | ---           | ---                                                                                                         | ---       | 8.49  | 7.26  | 3.10 | 3.84E-03 |
| 1422631_at   | Ahr           | aryl-hydrocarbon receptor                                                                                   | 11622     | 8.57  | 6.93  | 3.10 | 3.09E-03 |
| 1460578_at   | Fgd5          | FYVE, RhoGEF and PH domain containing 5                                                                     | 232237    | 10.71 | 9.11  | 3.06 | 4.91E-03 |
| 1435263_at   | Tmem106a      | transmembrane protein 106A                                                                                  | 217203    | 5.15  | 3.75  | 3.06 | 7.29E-03 |
| 1423726_at   | Vat1          | vesicle amine transport protein 1 homolog (T californica)                                                   | 26949     | 9.01  | 7.39  | 3.04 | 6.22E-04 |
| 1419616_at   | Bmpr2         | bone morphogenic protein receptor, type II (serine/threonine kinase)                                        | 12168     | 9.43  | 8.11  | 3.04 | 1.22E-03 |
| 1428085_at   | 1110057K04Rik | RIKEN cDNA 1110057K04 gene                                                                                  | 68832     | 6.23  | 4.59  | 3.03 | 4.44E-03 |
| 1457013_at   | Garnl1        | GTPase activating RANGAP domain-like 1                                                                      | 56784     | 6.91  | 4.94  | 3.01 | 9.80E-03 |
| 1423393_at   | Clic4         | chloride intracellular channel 4 (mitochondrial)                                                            | 29876     | 11.53 | 10.08 | 3.00 | 9.19E-03 |
| 1424354_at   | Tmem140       | transmembrane protein 140                                                                                   | 68487     | 11.81 | 10.14 | 3.00 | 8.96E-04 |
| 1436736_x_at | DOH4S114      | DNA segment, human D4S114                                                                                   | 27528     | 10.36 | 8.57  | 2.97 | 1.66E-03 |
| 1422861_s_at | Pdlim5        | PDZ and LIM domain 5                                                                                        | 56376     | 8.62  | 6.90  | 2.97 | 2.71E-04 |
| 1452807_s_at | 1500016O10Rik | RIKEN cDNA 1500016O10 gene                                                                                  | 68952     | 7.44  | 5.57  | 2.96 | 2.36E-03 |
| 1418098_at   | Adcy4         | adenylate cyclase 4                                                                                         | 104110    | 9.22  | 7.49  | 2.95 | 8.39E-03 |
| 1424568_at   | Tspan2        | tetraspanin 2                                                                                               | 70747     | 8.26  | 6.91  | 2.93 | 6.76E-03 |
| 1422541_at   | Ptprm         | protein tyrosine phosphatase, receptor type, M                                                              | 19274     | 10.77 | 9.67  | 2.87 | 7.41E-03 |
| 1455437_at   | BC033915      | cDNA sequence BC033915                                                                                      | 70661     | 6.31  | 4.94  | 2.85 | 7.38E-03 |
| 1428871_at   | 4121402D02Rik | RIKEN cDNA 4121402D02 gene                                                                                  | 100047441 | 8.96  | 7.60  | 2.83 | 7.79E-03 |
| 1438606_a_at | Clic4         | chloride intracellular channel 4 (mitochondrial)                                                            | 29876     | 10.18 | 8.73  | 2.83 | 7.36E-04 |
| 1421826_at   | Dil4          | delta-like 4 (Drosophila)                                                                                   | 54485     | 7.53  | 5.88  | 2.82 | 7.98E-03 |
| 1436892_at   | Spred2        | sprouty-related, EVH1 domain containing 2                                                                   | 114716    | 7.88  | 6.43  | 2.81 | 7.24E-03 |
| 1448318_at   | Adfp          | adipose differentiation related protein                                                                     | 11520     | 9.27  | 7.49  | 2.78 | 9.33E-03 |
| 1435823_x_at | Egfl7         | EGF-like domain 7                                                                                           | 353156    | 8.81  | 7.66  | 2.76 | 6.47E-03 |
| 1435436_at   | Epas1         | endothelial PAS domain protein 1                                                                            | 13819     | 12.71 | 11.42 | 2.74 | 1.37E-03 |
| 1453202_at   | E330016A19Rik | RIKEN cDNA E330016A19 gene                                                                                  | 214763    | 5.98  | 4.69  | 2.73 | 8.60E-03 |
| 1447933_at   | Kif26a        | kinesin family member 26A                                                                                   | 668303    | 10.41 | 8.75  | 2.72 | 2.56E-03 |
| 1453435_a_at | Fmo2          | flavin containing monooxygenase 2                                                                           | 55990     | 10.85 | 9.29  | 2.72 | 2.44E-03 |
| 1448864_at   | Snrk          | SNF related kinase                                                                                          | 20623     | 11.42 | 10.14 | 2.72 | 1.97E-03 |
| 1428471_at   | Sorbs1        | sorbin and SH3 domain containing 1                                                                          | 20411     | 9.13  | 7.83  | 2.72 | 5.61E-03 |
| 1455254_at   | 4833420G11Rik | RIKEN cDNA 4833420G11 gene                                                                                  | 108863    | 7.61  | 5.84  | 2.71 | 2.17E-03 |
| 1425716_s_at | Bak1          | BCL2-antagonist/killer 1                                                                                    | 12018     | 6.38  | 5.31  | 2.70 | 6.51E-03 |
| 1431415_a_at | Tbpl1         | TATA box binding protein-like 1                                                                             | 237336    | 8.54  | 7.08  | 2.69 | 9.52E-03 |
| 1453131_at   | Cd300lg       | CD300 antigen like family member G                                                                          | 52685     | 10.02 | 8.74  | 2.68 | 3.84E-03 |
| 1456012_x_at | Rnaset2b      | ribonuclease T2B                                                                                            | 68195     | 10.64 | 9.02  | 2.66 | 1.11E-03 |
| 1434075_at   | BC030336      | cDNA sequence BC030336                                                                                      | 233812    | 8.76  | 7.18  | 2.66 | 3.64E-03 |
| 1419043_a_at | Ilgp1         | interferon inducible GTPase 1                                                                               | 60440     | 10.93 | 9.31  | 2.60 | 5.44E-03 |
| 1440830_at   | Gpr116        | G protein-coupled receptor 116                                                                              | 224792    | 12.38 | 11.18 | 2.60 | 3.43E-03 |
| 1421604_a_at | Klf3          | Kruppel-like factor 3 (basic)                                                                               | 16599     | 10.82 | 9.10  | 2.60 | 6.65E-03 |
| 1456318_at   | Clec1a        | C-type lectin domain family 1, member a                                                                     | 243653    | 9.74  | 8.59  | 2.59 | 8.95E-03 |
| 1418394_a_at | Cd97          | CD97 antigen                                                                                                | 26364     | 7.56  | 6.57  | 2.58 | 5.10E-03 |
| 1457761_at   | C79607        | expressed sequence C79607                                                                                   | 98149     | 5.07  | 3.96  | 2.55 | 4.62E-03 |
| 1423461_a_at | Ubl3          | ubiquitin-like 3                                                                                            | 24109     | 8.78  | 7.54  | 2.52 | 9.52E-03 |
| 1455308_at   | Ano6          | anoctamin 6                                                                                                 | 105722    | 11.37 | 10.25 | 2.51 | 2.69E-03 |
| 1419879_s_at | Trim25        | tripartite motif-containing 25                                                                              | 217069    | 11.80 | 10.75 | 2.49 | 4.80E-03 |
| 1419342_at   | Tram2         | translocating chain-associating membrane protein 2                                                          | 170829    | 8.25  | 7.20  | 2.48 | 5.20E-03 |
| 1422788_at   | Slc43a3       | solute carrier family 43, member 3                                                                          | 58207     | 10.53 | 9.06  | 2.48 | 2.21E-03 |
| 1423725_at   | Pls3          | plastin 3 (T-isoform)                                                                                       | 102866    | 10.06 | 8.73  | 2.48 | 3.78E-04 |
| 1416179_a_at | Rdx           | radixin                                                                                                     | 19684     | 10.25 | 9.10  | 2.47 | 9.81E-03 |

|              |               |                                                                                                |        |       |       |      |          |
|--------------|---------------|------------------------------------------------------------------------------------------------|--------|-------|-------|------|----------|
| 1417948_s_at | Ilf2          | interleukin enhancer binding factor 2                                                          | 67781  | 7.81  | 6.32  | 2.43 | 4.17E-03 |
| 1453622_s_at | Mllt3         | myeloid/lymphoid or mixed-lineage leukemia (trithorax homolog, Drosophila); translocated to, 3 | 70122  | 8.19  | 7.25  | 2.42 | 9.71E-03 |
| 1420520_x_at | Eral1         | Era (G-protein)-like 1 (E. coli)                                                               | 57837  | 6.05  | 4.94  | 2.40 | 9.42E-03 |
| 1420911_a_at | Mfge8         | milk fat globule-EGF factor 8 protein                                                          | 17304  | 11.27 | 10.12 | 2.38 | 3.77E-04 |
| 1416268_at   | Ets2          | E26 avian leukemia oncogene 2, 3' domain                                                       | 23872  | 11.22 | 9.96  | 2.37 | 6.31E-03 |
| 1423816_at   | Cxx1a         | CAAX box 1 homolog A (human)                                                                   | 66158  | 7.87  | 6.58  | 2.37 | 4.30E-03 |
| 1434256_s_at | Cds2          | CDP-diacylglycerol synthase (phosphatidate cytidyltransferase) 2                               | 110911 | 8.98  | 7.48  | 2.34 | 4.43E-03 |
| 1433558_at   | Dab2ip        | disabled homolog 2 (Drosophila) interacting protein                                            | 69601  | 10.69 | 9.60  | 2.33 | 2.34E-03 |
| 1439539_at   | Tram2         | translocating chain-associating membrane protein 2                                             | 170829 | 8.33  | 7.12  | 2.32 | 5.39E-03 |
| 1437100_x_at | Pim3          | proviral integration site 3                                                                    | 223775 | 12.87 | 11.53 | 2.31 | 4.47E-03 |
| 1451069_at   | Pim3          | proviral integration site 3                                                                    | 223775 | 8.10  | 6.59  | 2.30 | 9.48E-03 |
| 1426825_at   | Fmnl3         | formin-like 3                                                                                  | 22379  | 8.62  | 7.46  | 2.29 | 2.68E-03 |
| 1424427_at   | Tada1l        | transcriptional adaptor 1 (HF11 homolog, yeast) like                                           | 27878  | 6.45  | 5.36  | 2.28 | 1.25E-03 |
| 1452836_at   | Lpin2         | lipin 2                                                                                        | 64898  | 9.36  | 7.88  | 2.27 | 8.05E-03 |
| 1428452_at   | 2810025M15Rik | RIKEN cDNA 2810025M15 gene                                                                     | 69953  | 9.43  | 8.03  | 2.25 | 6.50E-03 |
| 1450786_x_at | Pdlim5        | PDZ and LIM domain 5                                                                           | 56376  | 9.44  | 8.34  | 2.21 | 8.24E-03 |
| 1449666_at   | Atrnl1        | Attractin like 1                                                                               | 226255 | 8.23  | 7.15  | 2.21 | 3.10E-04 |
| 1434555_at   | Anp32a        | acidic (leucine-rich) nuclear phosphoprotein 32 family, member A                               | 11737  | 8.70  | 7.43  | 2.20 | 4.12E-03 |
| 1436698_x_at | Tmem204       | transmembrane protein 204                                                                      | 407831 | 11.91 | 10.86 | 2.20 | 4.57E-04 |
| 1448063_at   | Iqsec2        | IQ motif and Sec7 domain 2                                                                     | 245666 | 6.59  | 5.66  | 2.18 | 9.50E-03 |
| 1422910_s_at | Smc6          | structural maintenance of chromosomes 6                                                        | 67241  | 9.27  | 8.26  | 2.18 | 6.78E-03 |
| 1456200_at   | Ipmk          | inositol polyphosphate multikinase                                                             | 69718  | 7.76  | 6.50  | 2.17 | 3.86E-04 |
| 1416324_s_at | Kctd20        | potassium channel tetramerisation domain containing 20                                         | 66989  | 7.99  | 7.15  | 2.16 | 5.75E-03 |
| 1443966_at   | ---           | ---                                                                                            | ---    | 9.98  | 8.81  | 2.16 | 2.78E-03 |
| 1429399_at   | Rnf125        | ring finger protein 125                                                                        | 67664  | 10.29 | 9.29  | 2.16 | 1.55E-03 |
| 1434285_at   | Frm4a         | FERM domain containing 4A                                                                      | 209630 | 9.28  | 8.32  | 2.15 | 4.95E-03 |
| 1425742_a_at | Tsc22d1       | TSC22 domain family, member 1                                                                  | 21807  | 12.54 | 11.39 | 2.12 | 2.33E-04 |
| 1445597_s_at | Hrasl3        | HRAS like suppressor 3                                                                         | 225845 | 8.87  | 7.69  | 2.11 | 4.60E-03 |
| 1438230_at   | Pggt1b        | protein geranylgeranyltransferase type I, beta subunit                                         | 225467 | 8.45  | 7.49  | 2.10 | 2.16E-03 |
| 1428938_at   | Gnaq          | guanine nucleotide binding protein, alpha q polypeptide                                        | 14682  | 7.74  | 6.39  | 2.08 | 9.38E-03 |
| 1426578_s_at | Snapin        | SNAP-associated protein                                                                        | 20615  | 8.11  | 7.04  | 2.07 | 7.57E-03 |
| 1422879_at   | Sypl          | synaptophysin-like protein                                                                     | 19027  | 9.51  | 8.50  | 2.07 | 3.43E-03 |
| 1419659_s_at | Chic2         | cysteine-rich hydrophobic domain 2                                                             | 74277  | 8.64  | 7.66  | 2.06 | 5.67E-03 |
| 1416373_at   | Nfs1          | nitrogen fixation gene 1 (S. cerevisiae)                                                       | 18041  | 5.59  | 4.51  | 2.04 | 7.80E-03 |
| 1451979_at   | Kras          | v-Ki-ras2 Kirsten rat sarcoma viral oncogene homolog                                           | 16653  | 9.93  | 8.89  | 2.04 | 6.68E-03 |
| 1437734_at   | Ppp1r12a      | protein phosphatase 1, regulatory (inhibitor) subunit 12A                                      | 17931  | 8.65  | 7.55  | 2.03 | 7.86E-03 |
| 1450981_at   | Cnn2          | calponin 2                                                                                     | 12798  | 8.97  | 7.92  | 2.03 | 1.57E-03 |
| 1418186_at   | Gstt1         | glutathione S-transferase, theta 1                                                             | 14871  | 6.28  | 5.28  | 2.02 | 2.96E-04 |
| 1422047_at   | Cdh5          | cadherin 5                                                                                     | 12562  | 12.48 | 11.30 | 2.02 | 7.65E-03 |
| 1448525_a_at | Bnip3l        | BCL2/adenovirus E1B interacting protein 3-like                                                 | 12177  | 9.29  | 8.23  | 2.01 | 1.87E-03 |
| 1423319_at   | Hhex          | hematopoietically expressed homeobox                                                           | 15242  | 8.79  | 7.67  | 2.01 | 6.60E-04 |
